# Supplementary material for: Conceptual model for pluralistic healthcare behaviour: results from a qualitative study in southwestern Uganda
Source: PubMed Central journal article supplement — BMJ Open. 2020 Apr 20;10(4):e033410. doi: 10.1136/bmjopen-2019-033410 (PMC7204928; doi:10.1136/bmjopen-2019-033410), 2020-04-20
Supplement: bmjopen-2019-033410.draft_revisions.pdf [file bmjopen-2019-033410.draft_revisions.pdf]

# BMJ Open

BMJ Open is committed to open peer review. As part of this commitment we make the peer review history of every article we publish publicly available.

When an article is published we post the peer reviewers' comments and the authors' responses online. We also post the versions of the paper that were used during peer review. These are the versions that the peer review comments apply to.

The versions of the paper that follow are the versions that were submitted during the peer review process. They are not the versions of record or the final published versions. They should not be cited or distributed as the published version of this manuscript.

BMJ Open is an open access journal and the full, final, typeset and author-corrected version of record of the manuscript is available on our site with no access controls, subscription charges or pay-per-view fees (<http://bmjopen.bmj.com>).

If you have any questions on BMJ Open's open peer review process please email [info.bmjopen@bmj.com](mailto:info.bmjopen@bmj.com)

# BMJ Open

## A conceptual model for pluralistic healthcare behavior: results from a qualitative study in southwestern Uganda

|                               |                                                                                                                                                                                                                                                                                                                                                    |
|-------------------------------|----------------------------------------------------------------------------------------------------------------------------------------------------------------------------------------------------------------------------------------------------------------------------------------------------------------------------------------------------|
| Journal:                      | <i>BMJ Open</i>                                                                                                                                                                                                                                                                                                                                    |
| Manuscript ID                 | bmjopen-2019-033410                                                                                                                                                                                                                                                                                                                                |
| Article Type:                 | Research                                                                                                                                                                                                                                                                                                                                           |
| Date Submitted by the Author: | 05-Aug-2019                                                                                                                                                                                                                                                                                                                                        |
| Complete List of Authors:     | Sundararajan, Radhika; Weill Cornell Medical College, Center for Global Health; Weill Cornell Medical College, Emergency Medicine<br>Mwanga-Amumpaire, Juliet; Mbarara University of Science and Technology<br>King, Rachel; UCSF Medical Center, Global Health Sciences<br>Ware, Norma; Harvard Medical School, Global Health and Social Medicine |
| Keywords:                     | COMPLEMENTARY MEDICINE, International health services < HEALTH SERVICES ADMINISTRATION & MANAGEMENT, QUALITATIVE RESEARCH, PUBLIC HEALTH                                                                                                                                                                                                           |
|                               |                                                                                                                                                                                                                                                                                                                                                    |

SCHOLARONE™  
Manuscripts

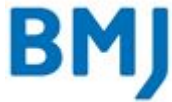

I, the Submitting Author has the right to grant and does grant on behalf of all authors of the Work (as defined in the below author licence), an exclusive licence and/or a non-exclusive licence for contributions from authors who are: i) UK Crown employees; ii) where BMJ has agreed a CC-BY licence shall apply, and/or iii) in accordance with the terms applicable for US Federal Government officers or employees acting as part of their official duties; on a worldwide, perpetual, irrevocable, royalty-free basis to BMJ Publishing Group Ltd ("BMJ") its licensees and where the relevant Journal is co-owned by BMJ to the co-owners of the Journal, to publish the Work in this journal and any other BMJ products and to exploit all rights, as set out in our [licence](#).

The Submitting Author accepts and understands that any supply made under these terms is made by BMJ to the Submitting Author unless you are acting as an employee on behalf of your employer or a postgraduate student of an affiliated institution which is paying any applicable article publishing charge ("APC") for Open Access articles. Where the Submitting Author wishes to make the Work available on an Open Access basis (and intends to pay the relevant APC), the terms of reuse of such Open Access shall be governed by a Creative Commons licence – details of these licences and which [Creative Commons](#) licence will apply to this Work are set out in our licence referred to above.

Other than as permitted in any relevant BMJ Author's Self Archiving Policies, I confirm this Work has not been accepted for publication elsewhere, is not being considered for publication elsewhere and does not duplicate material already published. I confirm all authors consent to publication of this Work and authorise the granting of this licence.

1  
2  
3 **A conceptual model for pluralistic healthcare behavior: results from a qualitative**  
4 **study in southwestern Uganda**  
5

6 Radhika Sundararajan MD, PhD<sup>1,2</sup>  
7 Juliet Mwanga-Amumpaire, MD, MS<sup>3</sup>  
8 Rachel King, PhD, MPH<sup>4</sup>  
9 Norma C. Ware, PhD<sup>5,6</sup>  
10

- 11 1. Department of Emergency Medicine, Weill Cornell Medicine, 525 East 68<sup>th</sup> Street,  
12 New York, 10065, USA, ras9199@med.cornell.edu; 212-746-0780  
13 2. Weill Cornell Center for Global Health, New York, USA  
14 3. Mbarara University of Science and Technology, Mbarara, Uganda  
15 4. Global Health Sciences, University of California San Francisco, USA  
16 5. Department of Medicine, Brigham and Women's Hospital, Boston, USA  
17 6. Department of Global Health and Social Medicine, Harvard Medical School, Boston  
18 USA  
19

20  
21 Word Count: 4953  
22  
23  
24  
25  
26  
27  
28  
29  
30  
31  
32  
33  
34  
35  
36  
37  
38  
39  
40  
41  
42  
43  
44  
45  
46  
47  
48  
49  
50  
51  
52  
53  
54  
55  
56  
57  
58  
59  
60

## ABSTRACT

**Introduction:** *Medical pluralism*, or concurrent utilization of multiple therapeutic modalities, is common in various international contexts, and has been characterized as a factor contributing to poor health outcomes in low-resource settings. Traditional healers are ubiquitous providers in most regions, including the study site of southwestern Uganda. It is not well understood why patients in pluralistic settings continue to engage with *both* therapeutic healthcare modalities, rather than simply selecting one or the other. The goal of this study was to identify factors that motivate pluralistic healthcare utilization, and create a general, conceptual framework of pluralistic health behavior.

**Methods:** In-depth interviews were conducted between September 2017 and February 2018 with patients seeking care at traditional healers (N=30) and at an outpatient medicine clinic (N=30) in Mbarara, Uganda; the study is nested within a longitudinal project examining HIV testing engagement among traditional healer-utilizing communities. Inclusion criteria included age  $\geq 18$  years, and ability to provide informed consent. Participants were recruited from healer practices representing the range of healer specialties. Following an inductive approach, interview transcripts were reviewed and coded to identify conceptual categories explaining healthcare utilization.

**Results:** We identified three broad categories relevant to healthcare utilization among study participants: 1) traditional healers treat patients with “care”; 2) biomedicine uses “modern” technologies; and 3) peer “testimony” influences healthcare engagement. These categories describe variables at the healthcare provider, healthcare system, and peer levels that interrelate to motivate individual engagement in pluralistic health resources.

**Conclusions:** Patients perceive clear advantages and disadvantages to biomedical and traditional care in medically pluralistic settings. We identified factors at the healthcare provider, healthcare system, and peer levels which influence patients’ therapeutic itineraries. Our findings provide a basis to improve health outcomes in medically pluralistic settings, and underscore the importance of recognizing traditional healers as important stakeholders in community health.

Word Count: 297 (300 words max)

Keywords: Medical pluralism, Uganda, traditional healers, qualitative

## STRENGTHS AND LIMITATIONS OF THIS STUDY

- Medical pluralism is common in both high- and low-resource settings, and has been characterized as a factor leading to poor health outcomes for both infectious and non-communicable diseases
- This study identifies factors that motivate utilization of healthcare in a medically pluralistic community
- Patients in pluralistic settings perceive clear advantages and disadvantages of both traditional care and biomedicine; characteristics of healthcare providers, the healthcare system, and peer influences motivate patients to engage with particular healthcare modalities
- Patients often prefer traditional healing instead of biomedicine; this utilization is not simply a function of limited access to biomedical resources
- Traditional healers should be considered important stakeholders in community health

## INTRODUCTION

*Medical pluralism*, or utilization of multiple therapeutic modalities, is common where both biomedical and complementary or alternative treatments are available to patients. This pattern of healthcare engagement is observed in both high-[1,2] and low-resource settings[3-5], and is well described for patients with both acute[6-8] and chronic illness[3,9-11] in various international contexts.

In low- and middle-income countries, traditional medicine is utilized instead of, or in concert with, biomedical therapies. Traditional healers have been defined by the World Health Organization as: 1) persons recognized by local community as healers; 2) having regular patient attendance; and 3) having space to receive and treat patients[5]. They “provide health care by using plant, animal and mineral substances, and other methods based on social, cultural, and religious practices” [12]. Prior work in medically pluralistic contexts shows that initial choice of therapeutic modality is driven by patients’ perceived etiology of illness, and provider trustworthiness[13-16]. Patients may switch modalities in the setting of treatment “failure”, when symptoms worsen or persist despite treatment[13,17].

Medical pluralism has been characterized as a central factor contributing to poor health outcomes. For example, researchers have shown that use of traditional medicine delays HIV testing and ART initiation[18], and interrupts HIV treatment[13], for people living with HIV (PLHIV). In Mozambique, PLHIV initially seeking care from traditional healers experienced significantly longer delays to diagnosis compared with those who did not utilize healers; this delay exponentially increased with corresponding increases in the number of healers consulted prior to receiving HIV testing[18]. In South Africa, medical pluralism was shown to be negatively associated with ART use in a cohort of PLHIV[19]. Research has also demonstrated that medical pluralism contributes to poor outcomes for non-infectious diseases, such as nonadherence to chemotherapy for cancer<sup>4,11</sup>, or poor outpatient linkage to care for patients with hypertension[11].

In many parts of the world, traditional healers are extensively utilized; for example, it is estimated that 80% of the population in sub-Saharan Africa visit traditional healers[5]. Traditional healer utilization may be partially attributed to accessibility: healers are present in higher numbers than physicians and biomedical resources, particularly in low-

1  
2  
3 resource settings[5]. However, their popularity cannot be strictly explained by  
4 convenience; research in urban regions having high density of biomedical facilities  
5 demonstrates similar reliance on traditional healers[1,3]. Patients also seek traditional  
6 therapies to address symptoms attributed to ancestral curses or bewitching, believed  
7 incurable by biomedicine[20]. Use of traditional medicine is also strongly tied to local  
8 religious and ethnic identities[21].  
9

10 Biomedical and traditional healers offer distinctive forms of healthcare for patients. In  
11 medically pluralistic contexts, it is not well understood why patients continue to engage  
12 with *both* therapeutic healthcare modalities, rather than simply selecting one or the  
13 other. There have been many disease-specific studies that describe factors influencing  
14 pluralistic therapeutic itineraries[17,19,22], but there remains a dearth of knowledge on  
15 variables that shape healthcare engagement generally in these communities. The goal  
16 of this study was to identify factors that motivate pluralistic engagement with healthcare  
17 resources, using qualitative research methods. We sought to characterize salient  
18 perceived advantages and disadvantages of each modality, and explain pluralistic  
19 therapeutic itineraries in a sub-Saharan African context. These data were used to  
20 develop a general, conceptual framework that can inform future research on pluralistic  
21 health behavior.  
22

## 23 24 **METHODS**

### 25 26 **Study Setting and Design**

27 This qualitative study was conducted in Mbarara District, Uganda, a district of 418,000  
28 residents located ~275 km southwest of the capital city of Kampala. Southwestern  
29 Uganda is a medically pluralistic context, where both traditional and biomedical  
30 modalities of healthcare co-exist [23-25]. In this region of sub-Saharan Africa, traditional  
31 healers practice herbalism and spiritual healing; they also set broken bones and attend  
32 births in the community. Spiritual healers attribute their powers to the *Bachwezi*, which  
33 are believed to be ancestral spirits from an ancient kingdom that previously occupied this  
34 region of eastern Africa[26,27]. This qualitative study was conducted as part of a multi-  
35 year, mixed methods study of HIV services engagement in a medically pluralistic  
36 community.  
37

### 38 39 **Sampling and Recruitment**

40 Following a purposive sampling strategy, sixty (N=60) adults were identified to  
41 participate as key informants in this study, or “individuals that are especially  
42 knowledgeable about or experienced with a phenomenon of interest”[28]. In our case,  
43 key informants were selected to represent variation in experiences of receiving  
44 modalities of healthcare: biomedical and traditional. That is, participants were patients  
45 representing two subgroups: (1) individuals receiving treatment from traditional healers  
46 (N=30), and (2) individuals receiving treatment from a biomedical general medicine  
47 outpatient clinic (N=30). Inclusion criteria for all participants were: 1) age ≥18 years; 2)  
48 ability to provide informed consent; and 3) seeking healthcare at either a traditional  
49 healer or outpatient biomedical clinic in Mbarara District.  
50

51 A target sample size of thirty participants per subgroup was guided by prior research  
52 suggesting that a range between 20 and 30 interviews is adequate to reach *thematic*  
53 *saturation*, the point at which no new concepts emerge from subsequent interviews[29-  
54 31]. Two authors (RS and JMA) reviewed transcripts as they were completed and  
55 corresponded weekly to identify and discuss emerging themes. After twenty-five  
56  
57  
58  
59  
60

1  
2  
3 interviews per group were conducted, the two authors agreed that interview content no  
4 longer contained new or surprising content. Five additional interviews per group were  
5 conducted to confirm thematic saturation.  
6

7 Participants in the traditional medicine subgroup were recruited from twelve traditional  
8 healer practices which reflected the range of specialties in this region (herbalist, bone  
9 setter, traditional birth attendant and spiritual healer). For the purposes of this study, we  
10 excluded Christian-based spiritual healers (i.e., “Born Again” or Pentecostal ministers).  
11 Participants in the biomedical subgroup were recruited from Mbarara Municipality Clinic,  
12 a general outpatient government-run clinic in the city of Mbarara, which serves  
13 approximately 50,000 patients per year.  
14

15  
16 Healers gave permission for study staff to recruit patients at their practices. At both  
17 traditional and biomedical facilities, research assistants approached patients following  
18 completion of visits healing sessions to assess eligibility and interest in participation.  
19 Recruitment was carried out over a period of six months (September 2017 - February  
20 2018);  
21

### 22 **Data Collection**

23 Data collection for this study consisted of a single in-depth interview, conducted by  
24 Ugandan research assistants (RAs) trained in qualitative research methods. Interviews  
25 followed an interview guide that included the following topics: 1) details of the patient’s  
26 therapeutic itinerary for his/her current symptoms; 2) symptoms that motivated him/her  
27 to seek healthcare; 3) attitudes towards, and experiences with, traditional and  
28 biomedicine; and 4) details of concurrent or recent biomedical and traditional healer  
29 visits. Interviews lasted approximately one hour and were conducted in the local  
30 language (Runyankore), in private locations at either healer practices or at the  
31 participating biomedical clinic. Participants received the equivalent of 10,000 Ugandan  
32 Shillings (UGX, ~\$3 USD) in household staples (cooking oil, sugar, salt, soap) in  
33 recognition the time and effort required to participate in the interview.  
34  
35

36 Interviews were digitally recorded, then transcribed and translated into English by the  
37 same RA who had conducted the interview. All transcripts were produced within 72  
38 hours of the interview being completed. The transcripts were reviewed by the first author  
39 for quality, content, and to provide feedback to the RAs regarding interviewing  
40 techniques. English transcripts were spot-checked against audio recordings by an author  
41 (JMA, who is fluent in Runyakore and English) to ensure validity and integrity of  
42 translations.  
43

### 44 **Analysis of Data**

45 A three-step, inductive approach was used to analyze the qualitative data, as follows: (1)  
46 development of codes; (2) coding; and (3) category construction.  
47

#### 48 **Development of Codes.**

49 Following an inductive approach to qualitative data analysis, interview transcripts were  
50 reviewed by the first author (RS) concurrently with data collection to identify an initial set  
51 of codes, or labels that described key concepts in the dataset. The inductive strategy  
52 provided overlap between qualitative interviewing and data analysis, allowing for iterative  
53 engagement with the dataset to identify emerging concepts of interest. As additional  
54 transcripts were produced and reviewed, codes were reviewed and refined to fit the  
55 data. Using the “constant comparison” method, newly coded text segments were  
56  
57  
58  
59  
60



compared to text segments previously marked with the same code to determine if they reflected the same concept<sup>[32]</sup>. This process was repeated until all transcripts had been reviewed. A final list of codes was produced through discussion and consensus among three co-authors (RS, JMA and RK).

#### Coding:

All study transcripts were coded, and re-coded when necessary, using the finalized list of codes. QSR NVivo 11 (QRS International Pty Ltd) was used for coding and data organization, but not in development of codes.

#### Category Construction:

Next, coded data were examined and grouped to form conceptual categories, where data are aggregated based on similarities of meaning. Categories are defined below using text examples. Quotes from participants are shown as italicized and indented. Interrelationships between categories were identified to create a conceptual framework illustrating factors that influence pluralistic health behavior (Figure 1).

#### Ethical Statement:

This research was approved by the Human Research Protections Program Institutional Research Board at the University of California, San Diego (#170672), Weill Cornell Medical College (#1803019105), Mbarara University of Science and Technology Research Ethics Committee (#16/01-17) and the Ugandan National Council for Science and Technology (#SS4338). Participants provided written and verbal informed consent in Runyankore.

## RESULTS

### Characteristics of Participants

Characteristics of study participants appear in Table 1. Over half of the sample had clinical experience with both biomedical and traditional modalities of healthcare. However, pluralistic behaviors were much more common among patients of traditional healers. The vast majority of participants recruited from the biomedical clinic denied prior experience receiving care from traditional healers (n=28/30, 93%); in contrast, *all* (n=30) traditional healer patients report prior experience receiving biomedical treatment.

Participants recruited from healer practice locations were slightly older, with a higher proportion being married, and with higher reported monthly incomes, compared to the

| Characteristic                                       | Traditional healer clients (N=30)                                                                 | Biomedical clients (N=30)                                         |
|------------------------------------------------------|---------------------------------------------------------------------------------------------------|-------------------------------------------------------------------|
| Had previously received care from alternate modality | N=30 (100%)                                                                                       | N=2 (7%)                                                          |
| Age (in years)                                       | 36.7 (mean)                                                                                       | 31.6 (mean)                                                       |
| Female gender (%)                                    | N = 16 (53%)                                                                                      | N= 18 (60%)                                                       |
| Primary school education or less                     | N= 14 (47%)                                                                                       | N = 13 (43%)                                                      |
| Household size (in persons)                          | 5.4 (mean)                                                                                        | 5.3 (mean)                                                        |
| Marital status                                       | Single (N = 7)<br>Married/Cohabiting (N = 21)<br>Widowed (N = 2)                                  | Single (N = 11)<br>Married/Cohabiting (N = 17)<br>Widowed (N = 2) |
| Christian religion                                   | N = 25                                                                                            | N = 23                                                            |
| Monthly household income (in USD)                    | \$121 (mean)                                                                                      | \$45 (mean)                                                       |
| Type of healer visited                               | Spiritualist (N=12)<br>Bone setter (N=10)<br>Traditional birth attendant (N=4)<br>Herbalist (N=4) | N/A                                                               |

1  
2  
3 biomedicine group. Other characteristics, including gender, household size, highest level  
4 of education, and religious affiliation, were similar between the two groups.  
5

## 6 **Qualitative Results**

### 7 Overview

8 Our qualitative data demonstrate salient perceived advantages and disadvantages to  
9 both healthcare modalities, which motivate patient engagement with healthcare  
10 resources. We have developed three broad categories representing influences on  
11 healthcare utilization that were evident in the data. They are summarized as follows: 1)  
12 traditional healers treat patients with “care”; 2) biomedicine uses “modern” technologies;  
13 and 3) peer “testimony” influences healthcare engagement. Within each of these  
14 categories, we provide examples to illustrate how these factors drive plural healthcare  
15 engagement. We consider each one separately, below, and then present a conceptual  
16 model for how these factors interrelate to create therapeutic itineraries in southwestern  
17 Uganda.  
18

### 19 *A. Traditional healers care about their patients*

20 Patients recruited from traditional healers report positive experiences with their care,  
21 specifically describing that treatments effectively relieve their symptoms. Participants  
22 state that they prefer traditional therapies because traditional practitioners “heal faster”.  
23 This efficient healing is sometimes attributed to the fact that traditional practitioners  
24 spend more time personally treating and caring for their patients, compared with  
25 healthcare workers in biomedical settings:  
26  
27

28 *Those [bonesetters] are super! They heal faster than biomedical. When you*  
29 *take your patient to a bonesetter, he does not take long to get healed, compared*  
30 *to one in the hospital. In hospitals, the healing process is long because they do*  
31 *not do much more than hanging you there [in traction] and leave you. You can*  
32 *even become lame because they do not check to see whether you are healing or*  
33 *not. But for the healer, he does his reviews [checks your wound healing]*  
34 *constantly. (Traditional healer patient, female, 68 years old)*  
35

36 Patients receiving traditional care also state that they are treated with respect when  
37 visiting healers, and that healers are motivated to care for patients, rather than being  
38 strictly economically driven. Participants reported that healers attend to patients  
39 immediately, even if they did not have money; a few participants stated that healers  
40 allowed them to pay for services rendered in installments, or in kind (through farm  
41 goods). A participant seeking care from a traditional birth attendant described her  
42 preference for traditional healing, emphasizing the kindness of her practitioner:  
43  
44

45 *[The healer] does everything for you. Her services are excellent. In fact, when*  
46 *you deliver [your children] from here, you do not even think of going elsewhere*  
47 *another time. She cares so much about her clients. In fact, for all my*  
48 *pregnancies, I received antenatal care from this healer. She is my neighbor, and*  
49 *instead of going to sit at the hospital the whole day waiting for checkup, I come*  
50 *here. She is my neighbor and her services are good. So, I come get my antenatal*  
51 *checkup, and go back home to do my chores. (Traditional healer patient, female*  
52 *35 years old)*  
53

54 In contrast, patients describe experiences with biomedicine with narratives of disrespect,  
55 mistreatment, neglect or “abuse”. The central message of these biomedical testimonies  
56  
57  
58  
59

1  
2  
3 is that healthcare workers do not care about their patients. In some cases, participants  
4 referred to these accounts while explaining why they tend to avoid biomedical facilities.  
5 A woman describes her experience receiving antenatal care at the local hospital:  
6

7 *I came to this hospital for antenatal care and found a nurse who treated me*  
8 *badly. She would tell you to lay on the bed and instead of telling you what to do,*  
9 *she would shout at you and say, "Don't face me! Face the other side!" in a loud*  
10 *voice, and you wonder what the problem was. She embarrassed me and I felt*  
11 *ashamed. I promised myself never to return in this hospital .... She would only*  
12 *shout at us. She was horrible. (Biomedical patient, female, 38 years old)*  
13

14  
15 A number of participants describe experiences at biomedical facilities where they are  
16 never attended to by biomedical staff, despite waiting for many hours – sometimes  
17 spending the entire day without receiving medical attention. These hours spent waiting  
18 come at the expense of childcare, household duties and income-generating activities.  
19 One man describes his experience seeking biomedical care for a toothache as follows:  
20

21 *I went to the referral hospital and spent there the whole day without treatment.*  
22 *The following morning, when I went back, I was given only Panadol*  
23 *[Acetaminophen]. I felt so sad. (Biomedical patient, male, 56 years old)*  
24

25 Another patient states that he gave up after waiting all day for a voluntary circumcision  
26 procedure:  
27

28 *You reach there and sit for the whole day without treatment. Drugs are never*  
29 *there and health workers do not attend to patients as it should be. They arrive at*  
30 *work late and leave work early. They are really bad. I went [to the clinic] one time*  
31 *for circumcision and sat there for many hours until I got hungry and gave up. I left*  
32 *without seeing any doctor. (Traditional healer patient, male, 27 years old)*  
33

#### 34 **B. Biomedicine uses modern technologies to heal**

35  
36 Participants state that biomedical care is preferred in instances where “modern”  
37 technologies can be utilized to provide a diagnosis for one’s symptoms, and guide  
38 treatment. Through blood and radiological tests, healthcare providers can identify the  
39 specific cause of a patient’s illness, and provide appropriate care. Patients perceive that  
40 the information generated by biomedical technology validates the therapies administered  
41 to them:  
42

43 *They use machines to diagnose and test for conditions. They give the right*  
44 *medical information. (Biomedical patient, male, 25).*  
45

46 Having received a specific diagnosis, participants also believe that the treatment  
47 recommended by healthcare workers will be effective in alleviating their symptoms. For  
48 example, one participant described how appropriate medicines have the capacity to  
49 heal, even if taken in small amounts:  
50

51 *When you come [to the clinic] you get diagnosed and they write for you a*  
52 *prescription and you get the medicine then their service is good ... Even if you*  
53 *get very little medicine from them and take it, you get healed. (Biomedical*  
54 *patient, female, 60 years old)*  
55  
56  
57  
58  
59  
60

1  
2  
3 Another patient explains why the capacity to intervene with modern biomedical  
4 technology is more effective in treating symptoms than traditional medicine:  
5

6 *Biomedical facilities are good ... when you are, for instance, in a critical*  
7 *condition, they can put you on life support machines, or they can put you on a*  
8 *drip. They can also give you tablets and injections that can help you. Traditional*  
9 *healers can't manage something like that. They don't have modern equipment.*  
10 *They don't have tablets, and they don't have drips and injections. (Traditional*  
11 *healer patient, male, 26 years old)*  
12

13  
14 Results from biomedical testing guide what some participants describe as “proper”,  
15 effective treatment, compared with traditional healing where therapies are provided in  
16 the absence of any diagnostic testing:  
17

18 *[Biomedical facilities] diagnose you and inform you of the ailment that you are*  
19 *suffering from, and at times inform you that your health is okay ... When you visit*  
20 *biomedical health facilities they diagnose you and inform you of your results and*  
21 *in case you are HIV positive, you can start on medicine ... [Traditional healers]*  
22 *don't have equipment to diagnose, so how do they diagnose for conditions? ... I*  
23 *don't trust them. (Biomedical patient, Female, 22 years old)*  
24

25 While biomedicine is favored for its use of diagnostic technologies, other participants  
26 describe preference for traditional healing *specifically because* these approaches could  
27 enable avoidance of biomedical procedures, which participants describe as  
28 “unnecessary” and having high morbidity and mortality. Participants state that an  
29 advantage of traditional healing is that it supports the body to heal “naturally”, rather  
30 requiring modern, invasive interventions. Participants report seeking traditional care after  
31 having been told by biomedical providers that they would require an operation in order to  
32 recover. Those who ultimately healed after receiving traditional care declared that  
33 biomedical providers rush to use modern technologies, instead of allowing the body to  
34 heal on its own. One patient describes his experience receiving care from a bonesetter,  
35 after suffering severe extremity fractures after falling from a motorcycle:  
36

37  
38 *[The hospital staff] told me that the doctors will cut off my leg because it was*  
39 *badly injured and that there was no way they could fix it ... When we reached*  
40 *[this healer], they told me that the bone that joins the knee was broken but*  
41 *promised that since I was in that place, in two to three weeks, I will be able to*  
42 *walk again. They then aligned my leg and started the treatment ... I am now*  
43 *getting better. If I had remained at the hospital, I know my leg would have been*  
44 *cut off by now. (Traditional healer patient, male, 35 years old)*  
45

46 Another patient describes how effective treatment from an herbalist allowed her sister to  
47 avoid a Caesarean section with her twin pregnancy:  
48

49 *These healers are very useful ... my elder sister had a problem with her twin*  
50 *pregnancy. She was stuck with the pregnancy because the babies could not*  
51 *move. They took her to one of the traditional healers and was given medicine*  
52 *which helped her so much and she delivered her babies without difficulties. We*  
53 *thought she would be operated on while giving birth [via Caesarean section]*  
54 *because the doctors at referral hospital had told her that she will not manage to*  
55 *push and advised her to go for an operation, which did not happen because of*  
56  
57  
58  
59

1  
2  
3 *the medicine the healer gave her. (Traditional healer patient, female, 30 years*  
4 *old)*  
5

6 Participants described fear of utilizing biomedical facilities to deliver their children, as  
7 they believed that physicians would perform unnecessary Caesarian sections,  
8 considered a high-risk procedure for both mothers and infants:  
9

10 *[Doctors] rush women to the operating theatre when it's not necessary. Many*  
11 *women and babies have lost their lives due to the negligence of doctors. Women*  
12 *fear to deliver from hospital. (Traditional healer patient, male, 26 years old)*  
13

### 14 C. Peer “testimony” influences healthcare engagement

15 Our participants recount social narratives, or “testimonies” which describe healthcare  
16 experiences among peers within their communities. These discursive events evaluate a  
17 provider’s competence and effectiveness in addressing ailments, and describe negative  
18 or positive outcomes of treatments. Participants indicate that peer testimonies strongly  
19 influence where they choose to seek care for their symptoms. We found that biomedical  
20 narratives frequently reinforced individual reports of mistreatment; in contrast, narratives  
21 about traditional healing were generally positive and affirmed the “real” nature of this  
22 form of healthcare.  
23

24  
25 Numerous participants who received care from traditional healers describe negative peer  
26 narratives about biomedicine. A participant describes the testimony from his neighbor  
27 that influenced his decision to seek care from a traditional bonesetter:  
28

29 *My neighbor reached [the referral hospital after injuring his leg], but nothing much*  
30 *was done. They made him sit on the waiting bench and the doctor told the*  
31 *caretaker to go and buy a bandage and find an empty box. The doctor then*  
32 *dismantled the box and tied it on the leg using the bandage and left him there.*  
33 *He remained there until morning. .... He never got any treatment [for the leg*  
34 *injury] apart from the empty boxes they tied on the leg. I will never forget what he*  
35 *experienced from the referral hospital. It was so bad and so discouraging. Health*  
36 *workers do not care about patients. (Traditional healer patient, male, 57 years*  
37 *old)*  
38  
39

40 A number of participants recalled community narratives indicating that healthcare  
41 workers would intentionally withhold treatment or harm their patients. One woman  
42 seeking care at a traditional birth attendant practice describes stories that made her fear  
43 that she would be harmed at the hands of healthcare workers:  
44

45 *There was a woman in labor who was supposed to be taken to the operating*  
46 *theatre but the nurses asked her for money, which she did not have. They*  
47 *refused to work on her until other patients contributed some money and gave it to*  
48 *the nurses ... Those nurses do not mind whether you die from there or not ...*  
49 *There is also one mother I heard about who took her child for immunization and*  
50 *got an argument with the nurse. Intentionally the nurse gave the child overdose*  
51 *and the child died. Some of these health workers are so wicked. (Traditional*  
52 *healer patient, female, 35 years old)*  
53  
54  
55  
56  
57  
58  
59

1  
2  
3 Negative peer testimonies were not limited to patients of healers. For example, one  
4 woman seeking biomedical care told a story about her neighbor suffering mistreatment  
5 at the same facility.  
6

7 *My pregnant neighbor delivered her baby in the village compound. [When they*  
8 *arrived at this hospital for post-partum care], the nurse abused her, saying that*  
9 *she should take her stupidity back to her village. They do not care. (Biomedical*  
10 *patient, female, 22 years old).*  
11

12 In stark contrast to narratives surrounding biomedical care, peer testimony surrounding  
13 traditional healing is largely positive. Healers are lauded for their effective care, and  
14 patients are guided by peer testimonials in selecting which healer to visit for their  
15 ailments. One participant seeking care at a traditional herbalist describes the impact of  
16 peer endorsements on her decision to seek care from this particular healer:  
17

18 *This healer is popular and well known, and wherever you go, people will*  
19 *recommend her to treat your sick child ... I have seen so many different people*  
20 *come here to receive treatment ... I am impressed. (Traditional healer patient,*  
21 *male, 18 years old).*  
22  
23

24 A central concept in many testimonies about traditional medicine is the genuineness of  
25 the healer, and how they should be set apart from traditional healers who may be “fake”  
26 or “quacks”. One participant describes how testimonies from peers with similar injuries  
27 directed him to seek care from a specific bonesetter, and how testimonies generate  
28 more patients for particular healers:  
29

30 *Most traditional healers are quacks, and personally I don't trust them.*  
31 *[Interviewer: Then how do you know that you will heal from this treatment?]*  
32 *I get the confidence from other people who have been treated here. There is a*  
33 *man from a nearby dairy. He bones were more severely broken than mine, but*  
34 *he healed from here, and is now doing his work. I have heard many people's*  
35 *testimonies that they have been healed from here ... When I come here and get*  
36 *healed, I will direct another one because he will be healed too and that person*  
37 *will also direct others... A healer who is real does not need to advertise on the*  
38 *radios because the people they heal create market for them. (Traditional healer*  
39 *patient, Male, 26 years old)*  
40  
41  
42

## 43 DISCUSSION

44 This study identified factors that drive engagement with healthcare resources in a  
45 medically pluralistic setting, and identified three central factors that contribute to  
46 therapeutic pluralism. These factors may be summarized as follows: 1) traditional  
47 healers care about their patients, while biomedical providers do not; 2) biomedical  
48 technologies can provide diagnosis and guide treatment, but these technologies are  
49 sometimes intentionally avoided; and 3) peer testimonies influence healthcare utilization,  
50 largely in favor of traditional healing. Figure 1 presents a conceptual model integrating  
51 our findings to show how influences at the healthcare provider, healthcare system, and  
52 peer levels influence individual engagement in pluralistic settings. This model is not  
53 inclusive of all variables that influence health engagement, but illustrates categories that  
54 were described by our participants in driving their own healthcare decision making,  
55 specifically regarding decisions to utilize traditional or biomedical care.  
56  
57  
58  
59

1  
2  
3  
4 First, our data illustrate that healthcare provider characteristics are of central importance  
5 to patients. Specifically, the quality of interpersonal interactions can either motivate or  
6 deter engagement with healthcare services. In our study, patient-provider interactions  
7 with traditional healers are described as generally respectful and supportive. In contrast,  
8 patient-provider interactions in biomedical contexts included narratives of neglect and  
9 “abuse”. The health effects of negative interactions with biomedical staff have been well  
10 described in cases of disengagement with HIV care among people living with HIV[33-  
11 35], decreased PrEP utilization among key populations[36] and among women giving  
12 birth[37-39]. Other researchers have similarly shown that traditional healers are favored  
13 in some cases because they provide social support within their communities, functioning  
14 as counselors, social workers, spiritual guides, and legal advisors[5,20,25,40-44].  
15

16  
17 Characteristics of the available healthcare systems impact healthcare engagement.  
18 Participants appreciate that biomedical laboratory and radiologic testing guide diagnosis  
19 and treatment, thereby gaining reassurance that they can heal from their illness through  
20 “proper” treatment. We note that the desire for healthcare directed by test results is the  
21 central factor favoring biomedical healthcare utilization among our participants.  
22 Interestingly, data from high-resource contexts has shown that diagnostic test results do  
23 not increase patient reassurance or decrease health-related anxiety in outpatient  
24 biomedical settings[45,46]. It is likely that in our medically pluralistic study site, the  
25 capacity of biomedical facilities to perform diagnostic testing is distinctive in contrast to  
26 traditional healing approaches, and therefore considered a benefit. Further, our  
27 qualitative data draws from patients’ own words describing reassurance in receipt of  
28 diagnostic testing, whereby the prior studies employ quantitative measurements of  
29 patient reassurance and anxiety.  
30

31  
32 We also found that traditional healthcare is sometimes preferred as a means to avoid  
33 invasive procedures, such as orthopedic fixation, limb amputation, or Caesarean section.  
34 Our findings are congruent with prior research demonstrating avoidance of facility-based  
35 obstetric services, preference for traditional home birth[25,39,47], and bonesetters to  
36 heal orthopedic injuries in sub-Saharan Africa[48,49]. Motivation to avoid invasive  
37 operative procedures is further explained by data that show poor post-operative  
38 outcomes throughout sub-Saharan Africa[50]; for example, maternal mortality after  
39 Caesarean section is fifty times higher in Africa compared with high income  
40 countries[51]. As such, patients consider invasive biomedical procedures high risk, and  
41 seek to avoid them through receipt of traditional therapies.  
42

43  
44 Additionally, the content of peer testimonies strongly influences patients’ decisions to  
45 utilize traditional or biomedical care. Peers can be defined as other adults residing in the  
46 same community as the participant, who have relevant experiences receiving biomedical  
47 care, traditional care, or both. Peer influences have been shown to have strong impact  
48 on individual healthcare engagement in the cases of HIV services utilization[52-54],  
49 adolescent health[55,56], mental health[57], and substance misuse[58], for example.  
50 Our study shows how peer testimonies serve as endorsements of traditional healing,  
51 legitimizing its use through descriptions of clinical effectiveness. In contrast, largely  
52 negative narratives regarding biomedicine potentiate avoidance of these facilities and  
53 services.  
54

55  
56 Finally, our data contribute to a growing body of work that emphasizes the important role  
57 of traditional healers within the communities they serve. Our findings illustrate why  
58  
59

1  
2  
3 traditional medicine may be preferred, even when biomedical services are available and  
4 accessible to patients. Lack of biomedical engagement in pluralistic settings should not  
5 simply be attributed to lack of access, but should be considered an individual's informed  
6 healthcare choice. We suggest that public health interventions specifically engage with  
7 traditional healers to increase intervention impact and community acceptability; they are  
8 well positioned allies for any community-based health program. Studies have shown that  
9 healers are interested in working with biomedical providers to improve health outcomes  
10 for their patients[59-61].  
11

12 There are a few limitations of this study. It is beyond the scope of this research to  
13 investigate the effectiveness or appropriateness of therapies administered by providers  
14 to the participants in our study. Similarly, it is out of our scope to consider the  
15 ethnopharmacological and ethnobotanical literature investigating the clinical efficacy of  
16 traditional therapies, which could impact a patients' clinical improvement and  
17 assessment of effective treatment; that literature is not discussed here. Last, qualitative  
18 data are meant to be specific and contextual rather than broadly generalizable, and are  
19 useful in generating hypotheses. As such, our data suggest numerous directions for  
20 future study; for example, do the factors we identified influence patients differentially as  
21 a function of patient age, gender, socio-economic status, or other individual  
22 characteristics? Are there distinctions among healers or their clients that predict  
23 increased biomedical or traditional utilization, such as gender, specialty, symptoms, or  
24 cost? How can public health initiatives that collaborate with traditional healers be  
25 optimally delivered in medically pluralistic settings?  
26  
27  
28

## 29 **CONCLUSIONS**

30 Patients perceive clear advantages and disadvantages to biomedical and traditional care  
31 in medically pluralistic settings. We identified factors at the healthcare provider,  
32 healthcare system, and peer levels which can influence patients' therapeutic itineraries,  
33 and illustrate why traditional healers are sometimes preferred. Our findings provide a  
34 basis for public health interventions in medically pluralistic communities, and underscore  
35 the importance of recognizing and engaging with traditional healers as important  
36 stakeholders in community health.  
37  
38

## 39 **ACKNOWLEDGEMENTS**

40 The authors would like to acknowledge the work of our research assistants, Patricia  
41 Tushemereirwe, Donny Ndazima and Doreen Nabukalu. We are grateful to the  
42 traditional healers and patients in Mbarara District for sharing their experiences with us.  
43

## 44 **CONTRIBUTORSHIP STATEMENT**

45 RS conceived of the study. RK and JMA provided input on study design, study  
46 procedures. RS and JMA oversaw data collection. RS was primarily responsible for data  
47 analysis, with input from JMA, RK and NW. RS composed the first draft of the  
48 manuscript. All authors provided input and approve of the final submission.  
49

## 50 **COMPETING INTERESTS**

51 The authors declare no competing interests.  
52

## 53 **FUNDING**

54 This study was supported by the National Institutes of Health (K23 MH111409), PI:  
55 Sundararajan. RK is supported by the National Institutes of Health (R01 MH109337).  
56  
57



The study funder did not have any role in the study design, collection, analysis, interpretation of data, nor in the decision to submit the article for publication. All authors are independent from the funders, and had full access to all of the data. All authors take responsibility for the integrity of the data and accuracy of the data analysis.

#### DATA SHARING STATEMENT

Deidentified data may be shared upon reasonable request by emailing the first author.

#### PATIENT AND PUBLIC INVOLVEMENT STATEMENT

Patients were included as participants in this study. They did not directly participate in the design or implementation of the study, as the purpose of the study was to elicit patient perspectives on community healthcare resources. Results of this study were used to guide development of a study community advisory board, which includes patients and other stakeholders, including healthcare providers and community leaders.

#### REFERENCES

- 1 Shih C-C, Su Y-C, Liao C-C, *et al.* Patterns of medical pluralism among adults: results from the 2001 National Health Interview Survey in Taiwan. *BMC Health Services Research* 2010;**10**:191. doi:10.1186/1472-6963-10-191
- 2 Wade C, Chao M, Kronenberg F, *et al.* Medical pluralism among American women: results of a national survey. *J Womens Health (Larchmt)* 2008;**17**:829–40. doi:10.1089/jwh.2007.0579
- 3 Hughes GD, Aboyade OM, Clark BL, *et al.* The prevalence of traditional herbal medicine use among hypertensives living in South African communities. *BMC Complement Altern Med* 2013;**13**:38. doi:10.1186/1472-6882-13-38
- 4 Broom A, Wijewardena K, Sibbritt D, *et al.* The use of traditional, complementary and alternative medicine in Sri Lankan cancer care: results from a survey of 500 cancer patients. *Public Health* 2010;**124**:232–7. doi:10.1016/j.puhe.2010.02.012
- 5 World Health Organization. WHO Traditional Medicine Strategy 2002–2005. <http://apps.who.int/medicinedocs/pdf/s2297e/s2297e.pdf> (accessed 30 Dec2015).
- 6 Makundi EA, Malebo HM, Mhame P, *et al.* Role of traditional healers in the management of severe malaria among children below five years of age: the case of Kilosa and Handeni Districts, Tanzania. *Malar J* 2006;**5**:58. doi:10.1186/1475-2875-5-58
- 7 Saifodine A, Gudo PS, Sidat M, *et al.* Patient and health system delay among patients with pulmonary tuberculosis in Beira city, Mozambique. *BMC Public Health* 2013;**13**:559. doi:10.1186/1471-2458-13-559
- 8 Beiersmann C, Sanou A, Wladarsch E, *et al.* Malaria in rural Burkina Faso: local illness concepts, patterns of traditional treatment and influence on health-seeking behaviour. *Malar J* 2007;**6**:106. doi:10.1186/1475-2875-6-106

- 1  
2  
3 9 Taylor TN, Dolezal C, Tross S, *et al*. Comparison of HIV/AIDS-specific quality of life  
4 change in Zimbabwean patients at western medicine versus traditional African  
5 medicine care sites. *JAIDS Journal of Acquired Immune Deficiency Syndromes*  
6 2008;**49**:552–6. doi:10.1097/QAI.0b013e31818d5be0  
7
- 8  
9 10 Wanyama JN, Tsui S, Kwok C, *et al*. Persons living with HIV infection on  
10 antiretroviral therapy also consulting traditional healers: a study in three African  
11 countries. *International Journal of STD & AIDS* 2017;**28**:1018–27.  
12 doi:10.1177/0956462416685890
- 13  
14 11 Liwa A, Roediger R, Jaka H, *et al*. Herbal and Alternative Medicine Use in  
15 Tanzanian Adults Admitted with Hypertension-Related Diseases: A Mixed-Methods  
16 Study. *Int J Hypertens* 2017;**2017**:5692572–9. doi:10.1155/2017/5692572  
17
- 18 12 World Health Organization. *The promotion and development of traditional medicine*.  
19 Geneva: : World Health Organization Technical Report Series 1978.  
20
- 21 13 Moshabela M, Bukonya D, Darong G, *et al*. Traditional healers, faith healers and  
22 medical practitioners: the contribution of medical pluralism to bottlenecks along the  
23 cascade of care for HIV/AIDS in Eastern and Southern Africa. *Sex Transm Infect*  
24 2017;**93**:e052974. doi:10.1136/sextrans-2016-052974  
25
- 26 14 Littlewood RA, Venable PA. A Global Perspective on Complementary and  
27 Alternative Medicine Use Among People Living with HIV/AIDS in the Era of  
28 Antiretroviral Treatment. *Curr HIV/AIDS Rep* 2011;**8**:257–68. doi:10.1007/s11904-  
29 011-0090-8  
30
- 31 15 Finkler K. Sacred Healing and Biomedicine Compared. *Medical Anthropology*  
32 *Quarterly* 1994;**8**:178–97.  
33
- 34 16 Sundararajan R, Kalkonde Y, Gokhale C, *et al*. Barriers to malaria control among  
35 marginalized tribal communities: a qualitative study. *PLoS ONE* 2013;**8**:e81966.  
36 doi:10.1371/journal.pone.0081966  
37
- 38 17 Moshabela M, Pronyk P, Williams N, *et al*. Patterns and implications of medical  
39 pluralism among HIV/AIDS patients in rural South Africa. *AIDS Behav*  
40 2011;**15**:842–52. doi:10.1007/s10461-010-9747-3  
41
- 42 18 Audet CM, Blevins M, Rosenberg C, *et al*. Symptomatic HIV-Positive Persons in  
43 Rural Mozambique Who First Consult a Traditional Healer Have Delays in HIV  
44 Testing : A Cross-Sectional Study. *Journal of Acquired Immune Deficiency*  
45 *Syndrome* 2014;**66**:80–6.  
46
- 47 19 Pantelic M, Cluver L, Boyes M, *et al*. Medical Pluralism Predicts Non-ART Use  
48 among Parents in Need of ART: A Community Survey in KwaZulu-Natal, South  
49 Africa. *AIDS Behav* 2014;**19**:137–44. doi:10.1007/s10461-014-0852-6  
50
- 51 20 Green EC. Sexually transmitted disease, ethnomedicine and health policy in Africa.  
52 *Social Science & Medicine* 1992;**35**:121–30. doi:10.1016/0277-9536(92)90159-N  
53  
54  
55  
56  
57  
58  
59

- 1  
2  
3 21 Broom A, Doron A, Tovey P. The inequalities of medical pluralism: Hierarchies of  
4 health, the politics of tradition and the economies of care in Indian oncology. *Soc*  
5 *Sci Med* 2009;**69**:698–706. doi:10.1016/j.socscimed.2009.07.002  
6  
7 22 Wanyenze RK, Kanya MR, Fatch R, *et al.* Missed opportunities for HIV testing and  
8 late-stage diagnosis among HIV-infected patients in Uganda. *PLoS ONE*  
9 2011;**6**:e21794. doi:10.1371/journal.pone.0021794  
10  
11 23 Horwitz RH, Tsai AC, Maling S, *et al.* No Association Found Between Traditional  
12 Healer Use and Delayed Antiretroviral Initiation in Rural Uganda. *AIDS Behav*  
13 2012;**17**:260–5. doi:10.1007/s10461-011-0132-7  
14  
15 24 Sundararajan R, Mwanga-Amumpaire J, Adrama H, *et al.* Sociocultural and  
16 Structural Factors Contributing to Delays in Treatment for Children with Severe  
17 Malaria: A Qualitative Study in Southwestern Uganda. *American Journal of Tropical*  
18 *Medicine and Hygiene* 2015;**92**:933–40. doi:10.4269/ajtmh.14-0784  
19  
20 25 Kyomuhendo GB. Low use of rural maternity services in Uganda: impact of  
21 women's status, traditional beliefs and limited resources. *Reproductive Health*  
22 *Matters* 2003;**11**:16–26. doi:10.1016/S0968-8080(03)02176-1  
23  
24 26 van Duijl M, Kleijn W, de Jong J. Unravelling the spirits' message: a study of help-  
25 seeking steps and explanatory models among patients suffering from spirit  
26 possession in Uganda. *Int J Ment Health Syst* 2014;**8**:24. doi:10.1186/1752-4458-8-  
27 24  
28  
29 27 Berger I, Buchanan C. The Cwezi cults and the history of western Uganda. In:  
30 Gallagher JT, ed. *East African Culture History*. Syracuse: 1976.  
31  
32 28 Palinkas LA, Horwitz SM, Green CA, *et al.* Purposeful Sampling for Qualitative Data  
33 Collection and Analysis in Mixed Method Implementation Research. *Adm Policy*  
34 *Ment Health* 2015;**42**:533–44. doi:10.1007/s10488-013-0528-y  
35  
36 29 Creswell JW. *Qualitative Inquiry & Research Design*. SAGE Publications: 2007.  
37  
38 30 Patton MQ. *Qualitative Evaluation and Research Methods*. SAGE Publications,  
39 1990.  
40  
41 31 Morse JM. Determining sample size. 2000.  
42  
43 32 Glaser BG, Strauss A. *The Discovery of Grounded Theory: Strategies for*  
44 *Qualitative Research*. Chicago: : Aldine 1967.  
45  
46 33 Ware NC, Wyatt MA, Geng EH, *et al.* Toward an understanding of disengagement  
47 from HIV treatment and care in sub-Saharan Africa: a qualitative study. *PLoS Med*  
48 2013;**10**:e1001369–discussione1001369. doi:10.1371/journal.pmed.1001369  
49  
50 34 Mwamba C, Sharma A, Mukamba N, *et al.* 'They care rudely!': resourcing and  
51 relational health system factors that influence retention in care for people living with  
52 HIV in Zambia. *BMJ Glob Health* 2018;**3**:e001007. doi:10.1136/bmjgh-2018-001007  
53  
54  
55  
56  
57  
58  
59

- 1  
2  
3 35 Layer EH, Brahmhatt H, Beckham SW, *et al.* 'I pray that they accept me without  
4 scolding:' experiences with disengagement and re-engagement in HIV care and  
5 treatment services in Tanzania. *AIDS Patient Care STDS* 2014;**28**:483–8.  
6 doi:10.1089/apc.2014.0077  
7
- 8 36 Quinn K, Dickson-Gomez J, Zarwell M, *et al.* 'A Gay Man and a Doctor are Just like,  
9 a Recipe for Destruction': How Racism and Homonegativity in Healthcare Settings  
10 Influence PrEP Uptake Among Young Black MSM. *AIDS Behav* 2019;**23**:1951–63.  
11 doi:10.1007/s10461-018-2375-z  
12
- 13 37 Bradley S, McCourt C, Rayment J, *et al.* Disrespectful intrapartum care during  
14 facility-based delivery in sub-Saharan Africa: A qualitative systematic review and  
15 thematic synthesis of women's perceptions and experiences. *Soc Sci Med*  
16 2016;**169**:157–70. doi:10.1016/j.socscimed.2016.09.039  
17
- 18 38 Asefa A, Bekele D, Morgan A, *et al.* Service providers' experiences of disrespectful  
19 and abusive behavior towards women during facility based childbirth in Addis  
20 Ababa, Ethiopia. *Reprod Health* 2018;**15**:4. doi:10.1186/s12978-017-0449-4  
21  
22
- 23 39 Sipsma H, Thompson J, Maurer L, *et al.* Preferences for home delivery in Ethiopia:  
24 provider perspectives. *Glob Public Health* 2013;**8**:1014–26.  
25 doi:10.1080/17441692.2013.835434  
26
- 27 40 Ndyomugenyi R, Neema S, Magnussen P. The use of formal and informal services  
28 for antenatal care and malaria treatment in rural Uganda. *Health Policy Plan*  
29 1998;**13**:94–102.  
30
- 31 41 Morris K. Treating HIV in South Africa—a tale of two systems. *The Lancet*  
32 2001;**357**:1190. doi:10.1016/S0140-6736(00)04401-9  
33
- 34 42 Bulterys M, Fowler MG, Shaffer N, *et al.* Role of traditional birth attendants in  
35 preventing perinatal transmission of HIV. *BMJ* 2002;**324**:222–4.  
36 doi:10.1136/bmj.324.7331.222  
37
- 38 43 Bodeker G, Carter G, Burford G, *et al.* HIV/AIDS: Traditional Systems of Health  
39 Care in the Management of a Global Epidemic. *The Journal of Alternative and*  
40 *Complementary Medicine* 2006;**12**:563–76. doi:10.1089/acm.2006.12.563  
41  
42
- 43 44 Lau BW. Why do patients go to traditional healers? *J R Soc Health* 1989;**109**:92–5.  
44
- 45 45 Rolfe A, Burton C. Reassurance after diagnostic testing with a low pretest  
46 probability of serious disease: systematic review and meta-analysis. *JAMA Intern*  
47 *Med* 2013;**173**:407–16. doi:10.1001/jamainternmed.2013.2762  
48
- 49 46 van Ravesteijn H, van Dijk I, Darmon D, *et al.* The reassuring value of diagnostic  
50 tests: a systematic review. *Patient Educ Couns* 2012;**86**:3–8.  
51 doi:10.1016/j.pec.2011.02.003  
52
- 53 47 Geleto A, Chojenta C, Mussa A, *et al.* Barriers to access and utilization of  
54 emergency obstetric care at health facilities in sub-Saharan Africa—a systematic  
55 review protocol. *Syst Rev* 2018;**7**:60. doi:10.1186/s13643-018-0720-y  
56  
57  
58  
59

- 1  
2  
3 48 Kisitu DK, Eyer LE, Kajja I, *et al.* A pilot orthopedic trauma registry in Ugandan  
4 district hospitals. *J Surg Res* 2016;**202**:481–8. doi:10.1016/j.jss.2015.12.028  
5
- 6 49 Onyemaechi NO, Lasebikan OA, Elachi IC, *et al.* Patronage of traditional  
7 bonesetters in Makurdi, north-central Nigeria. *Patient Prefer Adherence*  
8 2015;**9**:275–9. doi:10.2147/PPA.S76877  
9
- 10 50 Uribe-Leitz T, Jaramillo J, Maurer L, *et al.* Variability in mortality following  
11 caesarean delivery, appendectomy, and groin hernia repair in low-income and  
12 middle-income countries: a systematic review and analysis of published data.  
13 *Lancet Glob Health* 2016;**4**:e165–74. doi:10.1016/S2214-109X(15)00320-4  
14
- 15 51 Bishop D, Dyer RA, Maswime S, *et al.* Maternal and neonatal outcomes after  
16 caesarean delivery in the African Surgical Outcomes Study: a 7-day prospective  
17 observational cohort study. *Lancet Glob Health* 2019;**7**:e513–22.  
18 doi:10.1016/S2214-109X(19)30036-1  
19
- 20 52 Chang LW, Kagaayi J, Nakigozi G, *et al.* Effect of peer health workers on AIDS care  
21 in Rakai, Uganda: a cluster-randomized trial. *PLoS ONE* 2010;**5**:e10923.  
22 doi:10.1371/journal.pone.0010923  
23
- 24 53 Simoni JM, Nelson KM, Franks JC, *et al.* Are peer interventions for HIV efficacious?  
25 A systematic review. *AIDS Behav* 2011;**15**:1589–95. doi:10.1007/s10461-011-  
26 9963-5  
27
- 28 54 Semitala FC, Camlin CS, Wallenta J, *et al.* Understanding uptake of an intervention  
29 to accelerate antiretroviral therapy initiation in Uganda via qualitative inquiry. *J Int*  
30 *AIDS Soc* 2017;**20**:e25033. doi:10.1002/jia2.25033  
31
- 32 55 Kågesten A, Gibbs S, Blum RW, *et al.* Understanding Factors that Shape Gender  
33 Attitudes in Early Adolescence Globally: A Mixed-Methods Systematic Review.  
34 *PLoS ONE* 2016;**11**:e0157805. doi:10.1371/journal.pone.0157805  
35
- 36 56 Rock A, Barrington C, Abdoulayi S, *et al.* Social networks, social participation, and  
37 health among youth living in extreme poverty in rural Malawi. *Soc Sci Med*  
38 2016;**170**:55–62. doi:10.1016/j.socscimed.2016.10.005  
39
- 40 57 Coatsworth-Puspoky R, Forchuk C, Ward-Griffin C. Peer support relationships: an  
41 unexplored interpersonal process in mental health. *J Psychiatr Ment Health Nurs*  
42 2006;**13**:490–7. doi:10.1111/j.1365-2850.2006.00970.x  
43
- 44 58 Alberta AJ, Ploski RR, Carlson SL. Addressing challenges to providing peer-based  
45 recovery support. *J Behav Health Serv Res* 2012;**39**:481–91. doi:10.1007/s11414-  
46 012-9286-y  
47
- 48 59 King R, Homsy J. Involving traditional healers in AIDS education and counselling in  
49 sub-Saharan Africa: a review. *AIDS* 1997;**11 Suppl A**:S217–25.  
50
- 51 60 Kayombo EJ, Uiso FC, Mbwambo ZH, *et al.* Experience of initiating collaboration of  
52 traditional healers in managing HIV and AIDS in Tanzania. *J Ethnobiol Ethnomed*  
53 2007;**3**:6. doi:10.1186/1746-4269-3-6  
54  
55  
56  
57  
58  
59  
60

1  
2  
3 61 Green EC. The participation of African traditional healers in AIDS/STD prevention  
4 programmes. *Trop Doct* 1997;**27 Suppl 1**:56–9. doi:10.1177/00494755970270S117  
5  
6

7 **FIGURE CAPTION**

8 Figure 1. Conceptual model showing key factors within various levels (healthcare  
9 provider, healthcare system, peer) influencing individual health behavior within medically  
10 pluralistic contexts.  
11  
12  
13  
14  
15  
16  
17  
18  
19  
20  
21  
22  
23  
24  
25  
26  
27  
28  
29  
30  
31  
32  
33  
34  
35  
36  
37  
38  
39  
40  
41  
42  
43  
44  
45  
46  
47  
48  
49  
50  
51  
52  
53  
54  
55  
56  
57  
58  
59  
60

1  
2  
3  
4  
5  
6  
7  
8  
9  
10  
11  
12  
13  
14  
15  
16  
17  
18  
19  
20  
21  
22  
23  
24  
25  
26  
27  
28  
29  
30  
31  
32  
33  
34  
35  
36  
37  
38  
39  
40  
41  
42  
43  
44  
45  
46  
47  
48  
49  
50  
51  
52  
53  
54  
55  
56  
57  
58  
59  
60

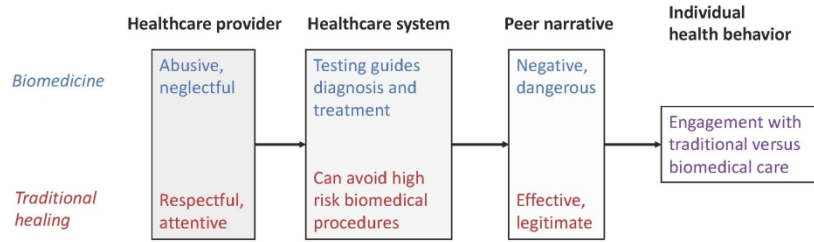

Figure 1. Conceptual model showing key factors within various levels (healthcare provider, healthcare system, peer) influencing individual health behavior within medically pluralistic contexts.

338x190mm (200 x 200 DPI)

# BMJ Open

## A conceptual model for pluralistic healthcare behavior: results from a qualitative study in southwestern Uganda

|                                 |                                                                                                                                                                                                                                                                                                                                                    |
|---------------------------------|----------------------------------------------------------------------------------------------------------------------------------------------------------------------------------------------------------------------------------------------------------------------------------------------------------------------------------------------------|
| Journal:                        | <i>BMJ Open</i>                                                                                                                                                                                                                                                                                                                                    |
| Manuscript ID                   | bmjopen-2019-033410.R1                                                                                                                                                                                                                                                                                                                             |
| Article Type:                   | Research                                                                                                                                                                                                                                                                                                                                           |
| Date Submitted by the Author:   | 14-Jan-2020                                                                                                                                                                                                                                                                                                                                        |
| Complete List of Authors:       | Sundararajan, Radhika; Weill Cornell Medical College, Center for Global Health; Weill Cornell Medical College, Emergency Medicine<br>Mwanga-Amumpaire, Juliet; Mbarara University of Science and Technology<br>King, Rachel; UCSF Medical Center, Global Health Sciences<br>Ware, Norma; Harvard Medical School, Global Health and Social Medicine |
| <b>Primary Subject Heading</b>: | Global health                                                                                                                                                                                                                                                                                                                                      |
| Secondary Subject Heading:      | Complementary medicine                                                                                                                                                                                                                                                                                                                             |
| Keywords:                       | COMPLEMENTARY MEDICINE, International health services < HEALTH SERVICES ADMINISTRATION & MANAGEMENT, QUALITATIVE RESEARCH, PUBLIC HEALTH                                                                                                                                                                                                           |
|                                 |                                                                                                                                                                                                                                                                                                                                                    |

SCHOLARONE™  
Manuscripts



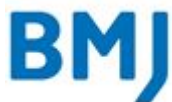

I, the Submitting Author has the right to grant and does grant on behalf of all authors of the Work (as defined in the below author licence), an exclusive licence and/or a non-exclusive licence for contributions from authors who are: i) UK Crown employees; ii) where BMJ has agreed a CC-BY licence shall apply, and/or iii) in accordance with the terms applicable for US Federal Government officers or employees acting as part of their official duties; on a worldwide, perpetual, irrevocable, royalty-free basis to BMJ Publishing Group Ltd ("BMJ") its licensees and where the relevant Journal is co-owned by BMJ to the co-owners of the Journal, to publish the Work in this journal and any other BMJ products and to exploit all rights, as set out in our [licence](#).

The Submitting Author accepts and understands that any supply made under these terms is made by BMJ to the Submitting Author unless you are acting as an employee on behalf of your employer or a postgraduate student of an affiliated institution which is paying any applicable article publishing charge ("APC") for Open Access articles. Where the Submitting Author wishes to make the Work available on an Open Access basis (and intends to pay the relevant APC), the terms of reuse of such Open Access shall be governed by a Creative Commons licence – details of these licences and which [Creative Commons](#) licence will apply to this Work are set out in our licence referred to above.

Other than as permitted in any relevant BMJ Author's Self Archiving Policies, I confirm this Work has not been accepted for publication elsewhere, is not being considered for publication elsewhere and does not duplicate material already published. I confirm all authors consent to publication of this Work and authorise the granting of this licence.

1  
2  
3 **A conceptual model for pluralistic healthcare behavior: results from a qualitative**  
4 **study in southwestern Uganda**  
5

6 Radhika Sundararajan MD, PhD<sup>1,2\*</sup>  
7 Juliet Mwanga-Amumpaire, MD, MS<sup>3</sup>  
8 Rachel King, PhD, MPH<sup>4</sup>  
9 Norma C. Ware, PhD<sup>5,6</sup>  
10

11 1. Department of Emergency Medicine, Weill Cornell Medicine, 525 East 68<sup>th</sup> Street,  
12 New York, 10065, USA, ras9199@med.cornell.edu; 212-746-0780

13 2. Weill Cornell Center for Global Health, New York, USA

14 3. Mbarara University of Science and Technology, Mbarara, Uganda

15 4. Global Health Sciences, University of California San Francisco, USA

16 5. Department of Medicine, Brigham and Women's Hospital, Boston, USA

17 6. Department of Global Health and Social Medicine, Harvard Medical School, Boston  
18 USA

19 \*corresponding author  
20  
21  
22  
23  
24  
25  
26  
27  
28  
29  
30  
31  
32  
33  
34  
35  
36  
37  
38  
39  
40  
41  
42  
43  
44  
45  
46  
47  
48  
49  
50  
51  
52  
53  
54  
55  
56  
57  
58  
59  
60

## ABSTRACT

**Introduction:** *Medical pluralism*, or concurrent utilization of multiple therapeutic modalities, is common in various international contexts, and has been characterized as a factor contributing to poor health outcomes in low-resource settings. Traditional healers are ubiquitous providers in most regions, including the study site of southwestern Uganda. Where both informal and formal healthcare services are both available, patients do not engage with both options equally. It is not well understood why patients choose to engage with one healthcare modality over the other. The goal of this study was explain therapeutic itineraries in a sub-Saharan African context and create a conceptual framework of pluralistic health behavior.

**Methods:** In-depth interviews were conducted from September 2017 – February 2018 with patients seeking care at traditional healers (N=30) and at an outpatient medicine clinic (N=30) in Mbarara, Uganda; the study is nested within a longitudinal project examining HIV testing engagement among traditional healer-utilizing communities. Inclusion criteria included age  $\geq 18$  years, and ability to provide informed consent. Participants were recruited from practices representing the range of healer specialties. Following an inductive approach, interview transcripts were reviewed and coded to identify conceptual categories explaining healthcare utilization.

**Results:** We identified three broad categories relevant to healthcare utilization: 1) traditional healers treat patients with “care”; 2) biomedicine uses “modern” technologies; and 3) peer “testimony” influences healthcare engagement. These categories describe variables at the healthcare provider, healthcare system, and peer levels that interrelate to motivate individual engagement in pluralistic health resources.

**Conclusions:** Patients perceive clear advantages and disadvantages to biomedical and traditional care in medically pluralistic settings. We identified factors at the healthcare provider, healthcare system, and peer levels which influence patients’ therapeutic itineraries. Our findings provide a basis to improve health outcomes in medically pluralistic settings, and underscore the importance of recognizing traditional healers as important stakeholders in community health.

**Keywords:** Medical pluralism, Uganda, traditional healers, qualitative

## STRENGTHS AND LIMITATIONS OF THIS STUDY

- This study illuminates factors that motivate engagement with healthcare resources by using data from biomedical and traditional medicine utilizers
- This study employed qualitative methods to explore participants' own experiences of healthcare modalities, and identify perceived advantages and disadvantages of each form of healing
- Participants within the traditional medicine group had nearly all previously sought biomedical care, while the biomedical group largely denied prior use of traditional medicine
- While the data gathered is highly contextual and specific to the study context, the conceptual model presented offers a broad application to other medically pluralistic communities
- Based on study findings, we suggest future approaches to healthcare initiatives, policies, and research in pluralistic settings

## INTRODUCTION

*Medical pluralism*, or utilization of multiple therapeutic modalities, is common where both biomedical and complementary or alternative treatments are available to patients. This pattern of healthcare engagement is observed in both high-[1-3] and low-resource settings[4-6], and is well described for patients with both acute[7] and chronic illness[8-10] in various international contexts. In low- and middle-income countries, complementary and alternative healthcare services are often provided by traditional healers, who practice outside of the formal biomedical system. Traditional healers are broadly defined by the World Health Organization as: 1) persons recognized by local community as healers; 2) having regular patient attendance; and 3) having space to receive and treat patients[11,12]. They “provide health care by using plant, animal and mineral substances, and other methods based on social, cultural, and religious practices”[13,14]. It is estimated that 80% of the population in sub-Saharan Africa visit traditional healers[15].

As such, traditional healers are an initial point of contact for patients in medically pluralistic settings. Patients may prefer informal health services from traditional healers because of their increased accessibility: healers are present in higher numbers than physicians and biomedical facilities, particularly in low-resource settings[16,17]. However, their popularity cannot be strictly explained by convenience. Research in urban regions having high density of biomedical institutions demonstrates similar reliance on traditional healers[16-18]. Patients may also seek out traditional therapies to address symptoms attributed to ancestral curses or bewitching, believed incurable by biomedicine[19]. Use of traditional medicine is also strongly tied to local religious and ethnic identities[20]. Patients may pursue traditional healing in the setting of biomedicine treatment “failure”, when symptoms worsen or persist despite ongoing therapies[21,22].

Prior research has shown that traditional healer use is a factor contributing to poor health outcomes among patients. For example, receiving care from a traditional healer has been shown to delay HIV testing and antiretroviral therapy (ART) initiation[23], and interrupt HIV treatment[22] for people living with HIV (PLHIV). In Mozambique, PLHIV initially seeking care from traditional healers experienced significantly longer delays to diagnosis compared with those who did not utilize healers; this delay exponentially grew with corresponding increases in the number of healers consulted prior to receiving HIV testing[23]. In South Africa, medical pluralism was shown to be negatively associated

1  
2  
3 with ART use in a cohort of PLHIV[24]. Use of traditional healers was also identified as  
4 an important variable contributing to the recent Ebola outbreak in West Africa[25].  
5 Studies have demonstrated that medical pluralism similarly contributes to poor outcomes  
6 for non-infectious diseases, such as nonadherence to chemotherapy for cancer[26,27],  
7 or poor outpatient linkage to care for patients with hypertension[28].  
8

9  
10 Because they are frequently consulted for most types of illness, traditional healers could  
11 be important allies for public health initiatives. Some programs have attempted to  
12 engage with healers for these purposes, which have included trainings for healers to  
13 deliver counseling and facility referral for HIV[29,30], TB[31], or malaria testing[32], or to  
14 increase uptake of prenatal care[33]. However, in most cases, program effectiveness  
15 has been limited by the fact that patients may not complete referrals to facilities. These  
16 findings highlight the fact that where both informal and formal healthcare services are  
17 available, patients do not engage with both options equally.  
18

19  
20 There remains a critical lack of understanding about why patients choose to utilize one  
21 healthcare resource, but not another. It is clear that biomedicine and traditional healing  
22 offer distinctive forms of healthcare for patients. But there is a dearth of knowledge on  
23 perceived advantages and disadvantages of each modality from the perspective of the  
24 healthcare user. Without this information, healthcare initiatives in pluralistic settings  
25 cannot be truly “patient-centered”, and are at risk for failure. The goal of this study was  
26 to identify factors that motivate engagement with healthcare resources, using qualitative  
27 research methods. We sought to explain therapeutic itineraries in a sub-Saharan African  
28 context by conducting interviews with users of biomedical and traditional healthcare  
29 resources. These data were used to develop a general, conceptual framework that can  
30 inform future work in medically pluralistic settings.  
31

## 32 **METHODS**

### 33 **Study Setting and Design**

34  
35 This qualitative study was conducted in Mbarara District, Uganda, a rural district of  
36 418,000 residents located ~275 km southwest of the capital city of Kampala.  
37 Southwestern Uganda is a medically pluralistic context, where both traditional and  
38 biomedical modalities of healthcare co-exist[34-36]. In this region of sub-Saharan Africa,  
39 traditional healers practice herbalism and spiritual healing; they also set broken bones  
40 and attend births in the community. Spiritual healers attribute their powers to the  
41 *Bachwezi*, which are believed to be ancestral spirits from an ancient kingdom that  
42 previously occupied this region of eastern Africa[37,38]. In Uganda, traditional healing is  
43 not formally recognized by the Ministry of Health; there is no centralized oversight of  
44 traditional healing training programs or services. This research was conducted as part of  
45 a multi-year, mixed methods study of HIV services engagement in a medically pluralistic  
46 community.  
47

### 48 **Sampling and Recruitment**

49  
50 Following a purposive sampling strategy, sixty (N=60) adults were identified to  
51 participate as key informants in this study, or “individuals that are especially  
52 knowledgeable about or experienced with a phenomenon of interest”[39]. In our case,  
53 key informants were selected to represent variation in experiences of receiving  
54 modalities of healthcare: biomedical and traditional. That is, participants were patients  
55 representing two subgroups: (1) individuals receiving treatment from traditional healers  
56 (N=30), and (2) individuals receiving treatment from a biomedical general medicine  
57  
58  
59

1  
2  
3 outpatient clinic (N=30). Inclusion criteria for all participants were: 1) age  $\geq 18$  years; 2)  
4 ability to provide informed consent; and 3) seeking healthcare at either a traditional  
5 healer or outpatient biomedical clinic in Mbarara District.  
6

7 Both verbal and written informed consent were obtained by Ugandan research  
8 assistants (RAs) prior to enrollment. After verbally reviewing the consent form, research  
9 staff used a 5-item questionnaire to assess whether the potential participant understood  
10 the study and consent process. This questionnaire posed questions critical to  
11 demonstrating consent, such as “How much time will this take you?”; “What are the  
12 possible benefits for you?”. If a potential participant demonstrated errors in  
13 understanding, these were corrected, and potential participants asked if they needed  
14 further clarification. If, after further attempts to clarify misunderstandings, study staff  
15 determined that the potential participant did not comprehend the consent process, or  
16 critical aspects of the study, they were not enrolled.  
17

18  
19 Participants in the traditional medicine subgroup were recruited from twelve traditional  
20 healer practices which reflected the range of specialties in this region (herbalist, bone  
21 setter, traditional birth attendant, and spiritual healer). All were located within 20  
22 kilometers of Mbarara town center. It is well established that men tend to have low  
23 uptake of in healthcare services in sub-Saharan Africa[1-3]. In order to ensure that male  
24 perspectives were represented, we recruited two-thirds of participants at healer practices  
25 who were known to provide services for men. Therefore, more bonesetter and spiritual  
26 healer patients are included in the traditional healer group. For the purposes of this  
27 study, we excluded Christian-based spiritual healers (i.e., “Born Again” or Pentecostal  
28 ministers). Participants in the biomedical subgroup were recruited from Mbarara  
29 Municipality Clinic, a general outpatient government-run clinic in the town of Mbarara,  
30 which serves approximately 50,000 patients per year. Services at this clinic are provided  
31 free of charge.  
32

33  
34 At both traditional and biomedical facilities, RAs approached patients following  
35 completion of visits to assess eligibility and interest in participation. Potential participants  
36 were individually recruited by RAs, who visited recruitment sites once per week during  
37 business hours to screen for eligible patients. Recruitment visits were scheduled on  
38 random days of the week to maximize variation of participants included in this study. A  
39 maximum of two participants was enrolled during each site visit in order to allow ample  
40 time to review informed consent and conduct minimally-structured interviews. This  
41 approach ensured interview quality, and was central to the inductive data analysis  
42 process by providing time to review interview content, provide feedback to RAs, and  
43 identify preliminary codes (see “Data Collection” and “Analysis of Data” sections for  
44 more details). Biomedical clinic leadership and traditional healers gave permission for  
45 study staff to recruit patients at their practices. Recruitment was carried out over a period  
46 of six months (September 2017 - February 2018).  
47

48  
49 A target sample size of 30 participants per subgroup was guided by prior research  
50 suggesting that a range between 20 and 30 interviews is adequate to reach *thematic*  
51 *saturation*, the point at which no new concepts emerge from subsequent interviews[40-  
52 42]. Two authors (RS and JMA) reviewed transcripts as they were completed and  
53 corresponded weekly to identify and discuss emerging themes. After 30 interviews per  
54 group were conducted, the authors agreed that thematic saturation had been reached,  
55 and interview content no longer contained new or surprising content.  
56  
57  
58  
59  
60

### Data Collection

Data collection for this study consisted of a single in-depth interview, conducted by Ugandan RAs trained in qualitative research methods. Interviews followed an interview guide that included the following topics: 1) details of the patient's therapeutic itinerary for his/her current symptoms; 2) symptoms that motivated him/her to seek healthcare; 3) attitudes towards, and experiences with, traditional and biomedicine; and 4) details of concurrent or recent biomedical and traditional healer visits. Interviews lasted approximately one hour and were conducted in the local language (Runyankore), in private locations at either healer practices or at the participating biomedical clinic. Participants received the equivalent of 10,000 Ugandan Shillings (UGX, ~\$3 USD) in household staples (cooking oil, sugar, salt, soap) in recognition of the time and effort required to participate in the interview.

Interviews were digitally recorded, then transcribed and translated into English by the same RA who had conducted the interview. All transcripts were produced within 72 hours of the interview being completed. The transcripts were reviewed by the first author for quality, content, and to provide feedback to the RAs regarding interviewing techniques. English transcripts were spot-checked against audio recordings by an author (JMA, who is fluent in Runyankore and English) to ensure validity and integrity of translations.

### Analysis of Data

A three-step, inductive approach was used to analyze the qualitative data, as follows: (1) development of codes; (2) coding; and (3) category construction. We employed an interpretive phenomenological approach to data analysis[43,44], as the goal of this study was to explore participants' own experiences and perspectives on healthcare engagement.

#### Development of Codes.

Following an inductive process, interview transcripts were reviewed by the first author (RS) concurrently with data collection to identify an initial set of codes, or labels that described key concepts in the dataset. The inductive strategy provided overlap between qualitative interviewing and data analysis, allowing for iterative engagement with the dataset to identify emerging concepts of interest. As additional transcripts were produced and reviewed, codes were reviewed and refined to fit the data. Using the "constant comparison" method, newly coded text segments were compared to text segments previously marked with the same code to determine if they reflected the same concept[45]. This process was repeated until all transcripts had been reviewed. A final list of codes was produced through discussion and consensus among three co-authors (RS, JMA and RK).

#### Coding:

All study transcripts were coded, and re-coded when necessary, using the finalized list of codes. QSR NVivo 11 (QRS International Pty Ltd) was used for coding and data organization, but not in development of codes.

#### Category Construction:

Next, coded data were examined and grouped to form conceptual categories, where data are aggregated based on similarities of meaning. Categories are defined below using text examples. Quotes from participants are shown as italicized and indented.

Interrelationships between categories were identified to create a conceptual framework illustrating factors that influence health behavior in a pluralistic context (Figure 1).

### Ethical Statement:

This research was approved by the Human Research Protections Program Institutional Research Board at the University of California, San Diego (#170672), Weill Cornell Medical College (#1803019105), Mbarara University of Science and Technology Research Ethics Committee (#16/01-17) and the Ugandan National Council for Science and Technology (#SS4338). Participants provided written and verbal informed consent in Runyankore.

## RESULTS

### Characteristics of Participants

Characteristics of study participants appear in Table 1. Over half of the sample had clinical experience with both biomedical and traditional modalities of healthcare.

| Characteristic                                           | Traditional healer clients (N=30)                                                                | Biomedical clients (N=30)                                         |
|----------------------------------------------------------|--------------------------------------------------------------------------------------------------|-------------------------------------------------------------------|
| Report previously receiving care from alternate modality | N=30 (100%)                                                                                      | N=2 (7%)                                                          |
| Age (in years)                                           | 30 (median)<br>IQR = 20                                                                          | 28.5 (median)<br>IQR = 10.75                                      |
| Female gender (%)                                        | N = 16 (53%)                                                                                     | N= 18 (60%)                                                       |
| Primary school education or less                         | N= 14 (47%)                                                                                      | N = 13 (43%)                                                      |
| Household size (in persons)                              | 5 (median)<br>IQR = 3                                                                            | 4.5 (median)<br>IQR = 3.5                                         |
| Marital status                                           | Single (N = 7)<br>Married/Cohabiting (N = 21)<br>Widowed (N = 2)                                 | Single (N = 11)<br>Married/Cohabiting (N = 17)<br>Widowed (N = 2) |
| Christian religion                                       | N = 25 (83%)                                                                                     | N = 23 (77%)                                                      |
| Monthly household income (in USD)                        | \$41 (median),<br>IQR = 76                                                                       | \$22 (median)<br>IQR = 46                                         |
| Type of healer visited on day of enrollment              | Spiritualist (N=12)<br>Bonesetter (N=10)<br>Traditional birth attendant (N=4)<br>Herbalist (N=4) | N/A                                                               |

However, pluralistic behaviors were much more commonly reported among patients of traditional healers. Only two participants recruited from the biomedical clinic reported prior experience receiving care from traditional healers (n=2/30, 7%); in contrast, all (n=30) traditional healer patients reported prior experience receiving biomedical treatment.

Participants recruited from healer practice locations were slightly older, with a higher proportion being married, and with higher reported monthly incomes, compared to the biomedicine group. Biomedical participants were recruited from a government-run medical

clinic, where they received health services at no cost. Therefore, we would expect lower household incomes, as they have preferentially sought to receive free medical care, rather than present to a fee-for-service facility. Other characteristics, including gender, household size, highest level of education, and religious affiliation, were similar between the two groups.

### Qualitative Results

#### Overview

Our qualitative data indicate important perceived advantages and disadvantages to both healthcare modalities, which motivate patient engagement with available resources. We have developed three broad categories representing influences on therapeutic itineraries that were evident in the data. They are summarized as follows: 1) traditional healers



1  
2  
3 treat patients with “care”; 2) biomedicine uses “modern” technologies; and 3) peer  
4 “testimony” influences healthcare engagement. Within each of these categories, we  
5 provide examples to illustrate how these factors drive plural healthcare engagement. We  
6 consider each one separately, below, and then present a conceptual model for how  
7 these factors interrelate to create therapeutic itineraries in southwestern Uganda.  
8

9  
10 *A. Traditional healers care about their patients*

11 Patients recruited from traditional healers report positive experiences with their care,  
12 specifically describing that treatments effectively relieve their symptoms. Participants  
13 state that they prefer traditional therapies because traditional practitioners “heal faster”.  
14 This efficient healing is sometimes attributed to the fact that traditional practitioners  
15 spend more time personally treating and caring for their patients, compared with  
16 healthcare workers in biomedical settings:  
17

18 *Those [bonesetters] are super! They heal faster than biomedical. When you*  
19 *take your patient to a bonesetter, he does not take long to get healed, compared*  
20 *to one in the hospital. In hospitals, the healing process is long because they do*  
21 *not do much more than hanging you there [in traction] and leave you. You can*  
22 *even become lame because they do not check to see whether you are healing or*  
23 *not. But for the healer, he does his reviews [checks your wound healing]*  
24 *constantly. (Bonesetter patient, female)*  
25

26 Patients receiving traditional care also state that they are treated with respect when  
27 visiting healers, and that healers are motivated to care for patients, rather than being  
28 strictly economically driven. Participants reported that healers attend to patients  
29 immediately, even if they did not have money; a few participants stated that healers  
30 allowed them to pay for services rendered in installments, or in kind (through farm  
31 goods). A participant seeking care from a traditional birth attendant described her  
32 preference for traditional healing, emphasizing the kindness of her practitioner:  
33

34  
35 *[The healer] does everything for you. Her services are excellent. In fact, when*  
36 *you deliver [your children] from here, you do not even think of going elsewhere*  
37 *another time. She cares so much about her clients. In fact, for all my*  
38 *pregnancies, I received antenatal care from this healer. She is my neighbor, and*  
39 *instead of going to sit at the hospital the whole day waiting for checkup, I come*  
40 *here. She is my neighbor and her services are good. So, I come get my antenatal*  
41 *checkup, and go back home to do my chores. (Traditional birth attendant patient,*  
42 *female)*  
43

44 In contrast, patients describe experiences with biomedicine with narratives of disrespect,  
45 mistreatment, neglect or “abuse”. The central message of these biomedical testimonies  
46 is that healthcare workers do not care about their patients. In some cases, participants  
47 referred to these accounts while explaining why they tend to avoid biomedical facilities.  
48 A woman describes her experience receiving antenatal care at the local hospital:  
49

50  
51 *I came to this hospital for antenatal care and found a nurse who treated me*  
52 *badly. She would tell you to lay on the bed and instead of telling you what to do,*  
53 *she would shout at you and say, “Don’t face me! Face the other side!” in a loud*  
54 *voice, and you wonder what the problem was. She embarrassed me and I felt*  
55 *ashamed. I promised myself never to return in this hospital .... She would only*  
56 *shout at us. She was horrible. (Biomedical patient, female)*  
57  
58  
59

1  
2  
3  
4 A number of participants describe experiences at biomedical facilities where they are  
5 never attended to by biomedical staff, despite waiting for many hours – sometimes  
6 spending the entire day without receiving medical attention. These hours spent waiting  
7 come at the expense of childcare, household duties and income-generating activities.  
8 One man describes his experience seeking biomedical care for a toothache as follows:  
9

10  
11 *I went to the referral hospital and spent there the whole day without treatment.*  
12 *The following morning, when I went back, I was given only Panadol*  
13 *[Acetaminophen]. I felt so sad. (Biomedical patient, male)*

14  
15 Another patient states that he gave up after waiting all day for a voluntary circumcision  
16 procedure:  
17

18 *You reach there and sit for the whole day without treatment. Drugs are never*  
19 *there and health workers do not attend to patients as it should be. They arrive at*  
20 *work late and leave work early. They are really bad. I went [to the clinic] one time*  
21 *for circumcision and sat there for many hours until I got hungry and gave up. I left*  
22 *without seeing any doctor. (Bonesetter patient, male)*  
23

#### 24 B. Biomedicine uses modern technologies to heal

25 Participants state that biomedical care is preferred in instances where “modern”  
26 technologies can be utilized to provide a diagnosis for one’s symptoms, and guide  
27 treatment. Through blood and radiological tests, healthcare providers can identify the  
28 specific cause of a patient’s illness, and provide appropriate care. Patients perceive that  
29 the information generated by biomedical technology validates the therapies administered  
30 to them:  
31

32  
33 *They use machines to diagnose and test for conditions. They give the right*  
34 *medical information. (Biomedical patient, male).*  
35

36 Having received a specific diagnosis, participants also believe that the treatment  
37 recommended by healthcare workers will be effective in alleviating their symptoms. For  
38 example, one participant described how appropriate medicines have the capacity to  
39 heal, even if taken in small amounts:  
40

41 *When you come [to the clinic] you get diagnosed and they write for you a*  
42 *prescription and you get the medicine then their service is good ... Even if you*  
43 *get very little medicine from them and take it, you get healed. (Biomedical*  
44 *patient, female)*  
45

46 Another patient explains why the capacity to intervene with modern biomedical  
47 technology is more effective in treating symptoms than traditional medicine:  
48

49 *Biomedical facilities are good ... when you are, for instance, in a critical*  
50 *condition, they can put you on life support machines, or they can put you on a*  
51 *drip. They can also give you tablets and injections that can help you. Traditional*  
52 *healers can't manage something like that. They don't have modern equipment.*  
53 *They don't have tablets, and they don't have drips and injections. (Bonesetter*  
54 *patient, male)*  
55  
56  
57  
58  
59  
60

1  
2  
3 Results from biomedical testing guide what some participants describe as “proper”,  
4 effective treatment, compared with traditional healing where therapies are provided in  
5 the absence of any diagnostic testing:  
6

7 *[Biomedical facilities] diagnose you and inform you of the ailment that you are*  
8 *suffering from, and at times inform you that your health is okay ... When you visit*  
9 *biomedical health facilities they diagnose you and inform you of your results and*  
10 *in case you are HIV positive, you can start on medicine ... [Traditional healers]*  
11 *don't have equipment to diagnose, so how do they diagnose for conditions? ... I*  
12 *don't trust them. (Biomedical patient, Female)*  
13

14  
15 While biomedicine is favored for its use of diagnostic technologies, other participants  
16 describe preference for traditional healing *specifically because* these approaches could  
17 enable avoidance of biomedical procedures, which participants describe as  
18 “unnecessary” and having high morbidity and mortality. Participants state that an  
19 advantage of traditional healing is that it supports the body to heal “naturally”, rather  
20 requiring modern, invasive interventions. Participants report seeking traditional care after  
21 having been told by biomedical providers that they would require an operation in order to  
22 recover. Those who ultimately healed after receiving traditional care declared that  
23 biomedical providers rush to use modern technologies, instead of allowing the body to  
24 heal on its own. One patient describes his experience receiving care from a bonesetter,  
25 after suffering severe extremity fractures after falling from a motorcycle:  
26

27 *[The hospital staff] told me that the doctors will cut off my leg because it was*  
28 *badly injured and that there was no way they could fix it ... When we reached*  
29 *[this healer], they told me that the bone that joins the knee was broken but*  
30 *promised that since I was in that place, in two to three weeks, I will be able to*  
31 *walk again. They then aligned my leg and started the treatment ... I am now*  
32 *getting better. If I had remained at the hospital, I know my leg would have been*  
33 *cut off by now. (Bonesetter patient, male)*  
34

35  
36 Another patient describes how effective treatment from an herbalist allowed her sister to  
37 avoid a Caesarean section with her twin pregnancy:  
38

39 *These healers are very useful ... my elder sister had a problem with her twin*  
40 *pregnancy. She was stuck with the pregnancy because the babies could not*  
41 *move. They took her to one of the traditional healers and was given medicine*  
42 *which helped her so much and she delivered her babies without difficulties. We*  
43 *thought she would be operated on while giving birth [via Caesarean section]*  
44 *because the doctors at referral hospital had told her that she will not manage to*  
45 *push and advised her to go for an operation, which did not happen because of*  
46 *the medicine the healer gave her. (Spiritual healer patient, female)*  
47

48  
49 Participants described fear of utilizing biomedical facilities to deliver their children, as  
50 they believed that physicians would perform unnecessary Caesarian sections,  
51 considered a high-risk procedure for both mothers and infants:  
52

53 *[Doctors] rush women to the operating theatre when it's not necessary. Many*  
54 *women and babies have lost their lives due to the negligence of doctors. Women*  
55 *fear to deliver from hospital. (Spiritual healer patient, male)*  
56  
57  
58  
59

### C. Peer “testimony” influences healthcare engagement

Our participants recount social narratives, or “testimonies” which describe healthcare experiences among peers within their communities. These discursive events evaluate a provider’s competence and effectiveness in addressing ailments, and describe negative or positive outcomes of treatments. Participants indicate that peer testimonies strongly influence where they choose to seek care for their symptoms. We found that biomedical narratives frequently reinforced individual reports of mistreatment; in contrast, narratives about traditional healing were generally positive and affirmed the “real” nature of this form of healthcare.

Numerous participants who received care from traditional healers describe negative peer narratives about biomedicine. A participant describes the testimony from his neighbor that influenced his decision to seek care from a traditional bonesetter:

*My neighbor reached [the referral hospital after injuring his leg], but nothing much was done. They made him sit on the waiting bench and the doctor told the caretaker to go and buy a bandage and find an empty box. The doctor then dismantled the box and tied it on the leg using the bandage and left him there. He remained there until morning. .... He never got any treatment [for the leg injury] apart from the empty boxes they tied on the leg. I will never forget what he experienced from the referral hospital. It was so bad and so discouraging. Health workers do not care about patients. (Bonesetter patient, male)*

A number of participants recalled community narratives indicating that healthcare workers would intentionally withhold treatment or harm their patients. One woman seeking care at a traditional birth attendant practice describes stories that made her fear that she would be harmed at the hands of healthcare workers:

*There was a woman in labor who was supposed to be taken to the operating theatre but the nurses asked her for money, which she did not have. They refused to work on her until other patients contributed some money and gave it to the nurses ... Those nurses do not mind whether you die from there or not ... There is also one mother I heard about who took her child for immunization and got an argument with the nurse. Intentionally the nurse gave the child overdose and the child died. Some of these health workers are so wicked. (Herbalist patient, female)*

Negative peer testimonies were not limited to patients of healers. For example, one woman seeking biomedical care told a story about her neighbor suffering mistreatment at the same facility.

*My pregnant neighbor delivered her baby in the village compound. [When they arrived at this hospital for post-partum care], the nurse abused her, saying that she should take her stupidity back to her village. They do not care. (Biomedical patient, female).*

In stark contrast to narratives surrounding biomedical care, peer testimony surrounding traditional healing is largely positive. Healers are lauded for their effective care, and patients are guided by peer testimonials in selecting which healer to visit for their ailments. One participant seeking care at a traditional herbalist describes the impact of peer endorsements on her decision to seek care from this particular healer:

1  
2  
3  
4 *This healer is popular and well known, and wherever you go, people will*  
5 *recommend her to treat your sick child ... I have seen so many different people*  
6 *come here to receive treatment ... I am impressed. (Spiritual healer patient,*  
7 *male).*  
8

9  
10 A central concept in many testimonies about traditional medicine is the genuineness of  
11 the healer, and how they should be set apart from traditional healers who may be “fake”  
12 or “quacks”. One participant describes how testimonies from peers with similar injuries  
13 directed him to seek care from a specific bonesetter, and how testimonies generate  
14 more patients for particular healers:  
15

16 *Most traditional healers are quacks, and personally I don't trust them.*  
17 *[Interviewer: Then how do you know that you will heal from this treatment?]*  
18 *I get the confidence from other people who have been treated here. There is a*  
19 *man from a nearby dairy. He bones were more severely broken than mine, but*  
20 *he healed from here, and is now doing his work. I have heard many people's*  
21 *testimonies that they have been healed from here ... When I come here and get*  
22 *healed, I will direct another one because he will be healed too and that person*  
23 *will also direct others... A healer who is real does not need to advertise on the*  
24 *radios because the people they heal create market for them. (Bonesetter patient,*  
25 *male)*  
26

#### 27 *D. Conceptual Model*

28 Figure 1 presents a conceptual model integrating our findings to show how influences at  
29 the healthcare provider, healthcare system, and peer levels influence individual  
30 engagement with healthcare in pluralistic settings. These variables interact to shape an  
31 individual's therapeutic itinerary, but not necessarily in a stepwise manner. For  
32 healthcare users, one or more characteristics of a healthcare system may be of  
33 paramount importance in determining use of this resource, but each modality comes with  
34 potential disadvantages. Negative experiences could prompt users to switch to the  
35 alternate modality. We heard this process described by participants who believed their  
36 ailments were initially mismanaged by biomedical providers, and were subsequently  
37 healed using traditional approaches. Similarly, positive experiences contribute towards  
38 continued use of a healthcare modality, and an individual may become reticent to  
39 engage with the alternative in light of continued positive health outcomes.  
40  
41

## 42 **DISCUSSION**

43 This study identified variables that drive engagement with healthcare resources in a  
44 medically pluralistic setting, and identified three central factors that contribute to  
45 therapeutic pluralism. These may be summarized as follows: 1) traditional healers care  
46 about their patients, while biomedical providers do not; 2) biomedical technologies can  
47 provide diagnosis and guide treatment, but these technologies are sometimes  
48 intentionally avoided; and 3) peer testimonies influence healthcare utilization, largely in  
49 favor of traditional healing. These can be considered conceptually as factors operating at  
50 the healthcare provider, healthcare system, and peer levels (Figure 1).  
51

52  
53 Our work illustrates how healthcare provider characteristics are of central importance to  
54 patients. The quality of interpersonal interactions can either motivate or deter  
55 engagement with healthcare services. We found that patient-provider interactions with  
56 traditional healers are described as generally respectful and supportive, while patient-  
57  
58  
59

1  
2  
3 provider interactions in biomedical contexts included narratives of neglect and “abuse”.  
4 These findings align prior work showing that initial choice of therapeutic modality in  
5 pluralistic contexts is driven by perceived trustworthiness of a healthcare provider[22,46-  
6 49]. Our participant accounts of negative interactions with biomedical staff are congruent  
7 with prior work linking negative interactions with disengagement with HIV care among  
8 people living with HIV[4-6], decreased HIV pre-exposure prophylaxis (PrEP) utilization  
9 among key populations[7] and lack of healthcare facility use among pregnant women[8-  
10 10].  
11

12 We also describe how some characteristics of the available healthcare systems impact  
13 healthcare engagement. Our results speak to the hegemony of biomedicine in Uganda,  
14 and more broadly throughout post-colonial sub-Saharan Africa, where biomedicine is  
15 highly valued, and may be considered of superior quality and efficacy compared with  
16 traditional healing[11,12]. Some participants report gaining reassurance through  
17 laboratory and radiologic testing to guide diagnosis and therapy, describing this as  
18 “proper” treatment. We note that the desire for healthcare directed by “modern” test  
19 results is the central factor favoring biomedical healthcare utilization among our  
20 participants. Interestingly, other data from high-resource contexts has shown that  
21 diagnostic test results do not increase patient reassurance or decrease health-related  
22 anxiety in outpatient biomedical settings[50,51]. However, in our medically pluralistic  
23 study site, the capacity of biomedical facilities to perform diagnostic testing is distinctive  
24 in contrast to traditional medicine approaches, and therefore some patients consider  
25 access to testing as a benefit.  
26  
27

28 Traditional healthcare is sometimes preferred as a means to avoid invasive procedures,  
29 such as orthopedic fixation, limb amputation, or Caesarean section. Our findings are  
30 congruent with prior research demonstrating avoidance of facility-based obstetric  
31 services, preference for traditional home birth[10,36,52], and bonesetters to heal  
32 orthopedic injuries in sub-Saharan Africa[53,54]. Motivation to avoid invasive operative  
33 procedures is further explained by poor post-operative outcomes throughout sub-  
34 Saharan Africa[55]. For example, maternal mortality after Caesarean section is fifty  
35 times higher in Africa compared with high income countries[56]. As such, patients  
36 consider invasive biomedical procedures high risk, and seek to avoid them through  
37 receipt of traditional therapies.  
38  
39

40 Additionally, we note that the content of peer testimonies strongly influences patients’  
41 decisions to utilize traditional or biomedical care. Peer influences have been shown to  
42 have strong impact on individual healthcare engagement in the cases of HIV services  
43 utilization[57-59], adolescent health[60,61], mental health[62], and substance  
44 misuse[63], for example. Our study shows how peer testimonies serve as endorsements  
45 of traditional healing, legitimizing its use through descriptions of clinical effectiveness. In  
46 contrast, largely negative narratives regarding biomedicine potentiate avoidance of these  
47 facilities and services.  
48

49 Our findings provide insight on how patients decide to engage with particular healthcare  
50 resources, and can guide efforts to improve healthcare quality and interventions in  
51 medically pluralistic communities. Importantly, our conceptual model can direct  
52 strategies to engage those who may avoid biomedical resources, and have low uptake  
53 of conventional healthcare outreach program, which are frequently facility-based, and/or  
54 delivered by biomedical providers. Our data suggest that healthcare users value the  
55 interpersonal interactions and trustworthiness of healers, but also may gain reassurance  
56  
57  
58  
59

1  
2  
3 through receipt of biomedical testing and diagnostic technologies. An ideal health  
4 resource in a pluralistic context would potentially incorporate all of these valuable  
5 attributes. Traditional healers in Ghana have taken this approach, utilizing components  
6 of biomedical knowledge through reference to medical textbooks and “Google” [64].  
7 Similarly, we know of healers in Mbarara District who use glucometers, blood pressure  
8 cuffs, and performed commercially available rapid diagnostics tests for HIV and malaria.  
9 Our data suggest that decentralized healthcare services would be highly acceptable  
10 among pluralistic communities. An example of this approach at the national health policy  
11 level is demonstrated in the case of “differentiated care” for PLHIV[20], where service  
12 delivery is tailored to the needs of PLHIV in their communities, and biomedical facility  
13 visits are minimized.  
14

15  
16 Finally, our data contribute to a body of work that emphasizes the important role of  
17 traditional healers within the communities they serve. We hope our findings explain the  
18 persistent appeal of traditional medicine, and demonstrate that pluralistic behavior  
19 should be considered more than ‘an inconvenient truth’ for biomedical providers,  
20 researchers and policy makers. Low biomedical engagement in pluralistic settings  
21 should not simply be attributed to lack of access to formal resources, but should be  
22 considered an individual’s informed healthcare choice. We recommend that researchers  
23 and policy makers involve traditional healers when designing and implementing  
24 community-based health initiatives because healers are well positioned allies for  
25 healthcare programs. Community members may consider healers more trustworthy than  
26 biomedical providers[49]. Biomedicine could learn a great deal from healers regarding  
27 the power of interpersonal relationships as part of the healthcare process[13,14]. For  
28 example, Moshabela et. al. (2016) considered the roles of traditional healers in the  
29 context of a community-wide HIV testing and treatment intervention. They found that  
30 healers boosted impact and acceptability of the intervention through educating clients on  
31 HIV-related stigma and supporting linkage to HIV care[19].  
32

33  
34 Many studies have shown that healers are interested in working with biomedical  
35 providers to improve health outcomes for their patients[29,65,66]. However, the  
36 converse is not typically the case. Biomedical objections to traditional healing largely  
37 focus on use of alternatively explanatory mechanisms (such as belief that evil spirits or  
38 bad luck may cause physical symptoms), lack of standardized training and oversight of  
39 practices, and delivery of varying concentrations or mixtures of herbal therapies[15]. In  
40 fact, negative attitudes towards traditional medicine have been described as the primary  
41 barrier to true collaboration between traditional and biomedicine, as biomedical providers  
42 repeatedly downplay the skills and contributions of traditional healers[16,17]. Biomedical  
43 providers may express distrust and disapproval of traditional medicine in interactions  
44 with their patients[16-18]. Related to this lack of trust is the observation that our  
45 participant groups reported markedly different experiences with pluralistic healthcare  
46 utilization. Most biomedical participants denied prior use of traditional medicine, while  
47 most traditional medicine users reported having previously sought biomedical care. This  
48 difference in self-reporting is likely an example of a well described phenomenon, where  
49 patients are reticent to disclose traditional medicine use in the context of receiving  
50 biomedical care[18,67,68]. Therefore, we suspect that participants seeking care in the  
51 biomedical context under-reported traditional medicine use due to fear of social  
52 judgement.  
53

54  
55 There are a few limitations of this study. We acknowledge that baseline characteristics of  
56 participants recruited from traditional healer practices are different than those recruited  
57  
58  
59

1  
2  
3 from an outpatient biomedical practice. Qualitative samples are intended to be relevant  
4 to the research question, and may not be representative, as would be prioritized in a  
5 quantitative study. We did not record medical histories for our participants, and cannot  
6 speak to how particular diagnoses may motivate to healthcare itinerary, beyond the  
7 symptoms prompting the current visit. This study includes only people seeking  
8 healthcare from traditional healers, and similar work is needed for those seeking care  
9 from faith healers. Further, we acknowledge the potential impact of social judgement and  
10 recognize that some biomedical participants may have been reticent to share positive  
11 feelings about traditional medicine during their interviews. Last, our qualitative data  
12 indicate multiple directions for future research. For example, what are strategies to  
13 facilitate bidirectional cooperation between traditional and biomedical systems? How  
14 would one design and implement a decentralized healthcare initiative in cooperation with  
15 traditional healers?  
16

## 17 **CONCLUSIONS**

18 Patients perceive clear advantages and disadvantages to biomedical and traditional care  
19 in medically pluralistic settings. We identified factors at the healthcare provider,  
20 healthcare system, and peer levels which can influence patients' therapeutic itineraries,  
21 and illustrate why traditional medicine is sometimes preferred. Our findings can inform  
22 community-based, public health interventions in medically pluralistic contexts, and  
23 underscore the importance of recognizing and engaging with traditional healers as  
24 important stakeholders in community health.  
25

## 26 **ACKNOWLEDGEMENTS**

27 The authors would like to acknowledge the work of our research assistants, Patricia  
28 Tushemereirwe, Donny Ndazima and Doreen Nabukalu. We are grateful to the  
29 traditional healers and patients in Mbarara District for sharing their experiences with us.  
30  
31

## 32 **CONTRIBUTORSHIP STATEMENT**

33 RS conceived of the study. RK and JMA provided input on study design, study  
34 procedures. RS and JMA oversaw data collection. RS was primarily responsible for data  
35 analysis, with input from JMA, RK and NW. RS composed the first draft of the  
36 manuscript. All authors provided input and approve of the final submission.  
37  
38

## 39 **COMPETING INTERESTS**

40 The authors declare no competing interests.  
41

## 42 **FUNDING**

43 This study was supported by the National Institutes of Health (K23 MH111409), PI:  
44 Sundararajan. RK is supported by the National Institutes of Health (R01 MH109337).  
45 The study funder did not have any role in the study design, collection, analysis,  
46 interpretation of data, nor in the decision to submit the article for publication. All authors  
47 are independent from the funders, and had full access to all of the data. All authors take  
48 responsibility for the integrity of the data and accuracy of the data analysis.  
49

## 50 **DATA SHARING STATEMENT**

51 Deidentified data may be shared upon reasonable request by emailing the first author.  
52  
53

## 54 **PATIENT AND PUBLIC INVOLVEMENT STATEMENT**

55 Patients were included as participants in this study. They did not directly participate in  
56 the design or implementation of the study, as the purpose of the study was to elicit  
57  
58  
59



1  
2  
3 patient perspectives on community healthcare resources. Results of this study were  
4 used to guide development of a study community advisory board, which includes  
5 patients and other stakeholders, including healthcare providers, traditional healers and  
6 community leaders.  
7

## 8 9 REFERENCES

- 10  
11 1 Camlin CS, Ssemmondo E, Chamie G, *et al.* Men 'missing' from population-based  
12 HIV testing: insights from qualitative research. *AIDS Care* 2016;**28 Suppl 3**:67–73.  
13 doi:10.1080/09540121.2016.1164806  
14
- 15 2 Boum Y, Atwine D, Orikiriza P, *et al.* Male Gender is independently associated with  
16 pulmonary tuberculosis among sputum and non-sputum producers people with  
17 presumptive tuberculosis in Southwestern Uganda. *BMC Infect Dis* 2014;**14**:638.  
18 doi:10.1186/s12879-014-0638-5  
19
- 20 3 Chikovore J, Gillespie N, McGrath N, *et al.* Men, masculinity, and engagement with  
21 treatment as prevention in KwaZulu-Natal, South Africa. *AIDS Care* 2016;**28 Suppl**  
22 **3**:74–82. doi:10.1080/09540121.2016.1178953  
23
- 24 4 Ware NC, Wyatt MA, Geng EH, *et al.* Toward an understanding of disengagement  
25 from HIV treatment and care in sub-Saharan Africa: a qualitative study. *PLoS Med*  
26 2013;**10**:e1001369. doi:10.1371/journal.pmed.1001369  
27
- 28 5 Mwamba C, Sharma A, Mukamba N, *et al.* 'They care rudely!': resourcing and  
29 relational health system factors that influence retention in care for people living with  
30 HIV in Zambia. *BMJ Glob Health* 2018;**3**:e001007. doi:10.1136/bmjgh-2018-001007  
31
- 32 6 Layer EH, Brahmabhatt H, Beckham SW, *et al.* 'I pray that they accept me without  
33 scolding:' experiences with disengagement and re-engagement in HIV care and  
34 treatment services in Tanzania. *AIDS Patient Care STDS* 2014;**28**:483–8.  
35 doi:10.1089/apc.2014.0077  
36
- 37 7 Quinn K, Dickson-Gomez J, Zarwell M, *et al.* 'A Gay Man and a Doctor are Just like,  
38 a Recipe for Destruction': How Racism and Homonegativity in Healthcare Settings  
39 Influence PrEP Uptake Among Young Black MSM. *AIDS Behav* 2019;**23**:1951–63.  
40 doi:10.1007/s10461-018-2375-z  
41
- 42 8 Bradley S, McCourt C, Rayment J, *et al.* Disrespectful intrapartum care during  
43 facility-based delivery in sub-Saharan Africa: A qualitative systematic review and  
44 thematic synthesis of women's perceptions and experiences. *Soc Sci Med*  
45 2016;**169**:157–70. doi:10.1016/j.socscimed.2016.09.039  
46
- 47 9 Asefa A, Bekele D, Morgan A, *et al.* Service providers' experiences of disrespectful  
48 and abusive behavior towards women during facility based childbirth in Addis  
49 Ababa, Ethiopia. *Reprod Health* 2018;**15**:4. doi:10.1186/s12978-017-0449-4  
50
- 51 10 Sipsma H, Thompson J, Maurer L, *et al.* Preferences for home delivery in Ethiopia:  
52 provider perspectives. *Glob Public Health* 2013;**8**:1014–26.  
53 doi:10.1080/17441692.2013.835434  
54

- 11 Abdullahi AA. Trends and challenges of traditional medicine in Africa. *Afr J Tradit Complement Altern Med* 2011;**8**:115–23. doi:10.4314/ajtcam.v8i5S.5
- 12 Busia K. Medical provision in Africa -- past and present. *Phytother Res* 2005;**19**:919–23. doi:10.1002/ptr.1775
- 13 Blasini M, Peiris N, Wright T, *et al*. The Role of Patient-Practitioner Relationships in Placebo and Nocebo Phenomena. *Int Rev Neurobiol* 2018;**139**:211–31. doi:10.1016/bs.irm.2018.07.033
- 14 Kleinman A, Sung L. Why Do Indigenous Practitioners Successfully Heal? 1979;**138**:7–26. doi:10.1016/-01607987(79)90014-0
- 15 King R. Collaboration with traditional healers in HIV/AIDS prevention and care in sub-Saharan Africa. UNAIDS. Available at [www.data.unaids.org/publications/irc-pubjc-tradhealen.pdf](http://www.data.unaids.org/publications/irc-pubjc-tradhealen.pdf). 2000. Accessed 1 October 2019.
- 16 Audet CM, Salato J, Blevins M, *et al*. Educational intervention increased referrals to allopathic care by traditional healers in three high HIV-prevalence rural districts in Mozambique. *PLoS ONE* 2013;**8**:e70326–8. doi:10.1371/journal.pone.0070326
- 17 Gall A, Anderson K, Adams J, *et al*. An exploration of healthcare providers' experiences and perspectives of Traditional and complementary medicine usage and disclosure by Indigenous cancer patients. *BMC Complement Altern Med* 2019;**19**:259–9. doi:10.1186/s12906-019-2665-7
- 18 Puoane TR, Hughes GD, Uwimana J, *et al*. Why HIV positive patients on antiretroviral treatment and/or cotrimoxazole prophylaxis use traditional medicine: perceptions of health workers, traditional healers and patients: a study in two provinces of South Africa. *Afr J Tradit Complement Altern Med* 2012;**9**:495–502. doi:10.4314/ajtcam.v9i4.6
- 19 Moshabela M, Zuma T, Orne-Gliemann J, *et al*. 'It is better to die': experiences of traditional health practitioners within the HIV treatment as prevention trial communities in rural South Africa (ANRS 12249 TasP trial). *AIDS Care* 2016;**28** Suppl 3:24–32. doi:10.1080/09540121.2016.1181296
- 20 Long L, Kuchukhidze S, Pascoe S, *et al*. Differentiated models of service delivery for antiretroviral treatment of HIV in sub-Saharan Africa: a rapid review protocol. *Syst Rev* 2019;**8**:314–6. doi:10.1186/s13643-019-1210-6
- 21 Moshabela M, Pronyk P, Williams N, *et al*. Patterns and implications of medical pluralism among HIV/AIDS patients in rural South Africa. *AIDS Behav* 2011;**15**:842–52. doi:10.1007/s10461-010-9747-3
- 22 Moshabela M, Bukenya D, Darong G, *et al*. Traditional healers, faith healers and medical practitioners: the contribution of medical pluralism to bottlenecks along the cascade of care for HIV/AIDS in Eastern and Southern Africa. *Sex Transm Infect* 2017;**93**:e052974. doi:10.1136/sextrans-2016-052974

- 1  
2  
3 23 Audet CM, Blevins M, Rosenberg C, *et al.* Symptomatic HIV-Positive Persons in  
4 Rural Mozambique Who First Consult a Traditional Healer Have Delays in HIV  
5 Testing : A Cross-Sectional Study. *Journal of Acquired Immune Deficiency*  
6 *Syndrome* 2014;**66**:80–6.  
7
- 8 24 Pantelic M, Cluver L, Boyes M, *et al.* Medical Pluralism Predicts Non-ART Use  
9 among Parents in Need of ART: A Community Survey in KwaZulu-Natal, South  
10 Africa. *AIDS Behav* 2014;**19**:137–44. doi:10.1007/s10461-014-0852-6  
11
- 12 25 Manguvo A, Mafuvadze B. The impact of traditional and religious practices on the  
13 spread of Ebola in West Africa: time for a strategic shift. *Pan Afr Med J* 2015;**22**  
14 **Suppl 1**:9. doi:10.11694/pamj.suppl.2015.22.1.6190  
15
- 16 26 Iskandarsyah A, de Klerk C, Suardi DR, *et al.* Consulting a traditional healer and  
17 negative illness perceptions are associated with non-adherence to treatment in  
18 Indonesian women with breast cancer. *Psychooncology* 2014;**23**:1118–24.  
19 doi:10.1002/pon.3534  
20
- 21 27 Broom A, Wijewardena K, Sibbritt D, *et al.* The use of traditional, complementary  
22 and alternative medicine in Sri Lankan cancer care: results from a survey of 500  
23 cancer patients. *Public Health* 2010;**124**:232–7. doi:10.1016/j.puhe.2010.02.012  
24  
25
- 26 28 Liwa A, Roediger R, Jaka H, *et al.* Herbal and Alternative Medicine Use in  
27 Tanzanian Adults Admitted with Hypertension-Related Diseases: A Mixed-Methods  
28 Study. *Int J Hypertens* 2017;**2017**:5692572–9. doi:10.1155/2017/5692572  
29
- 30 29 King R, Homsy J. Involving traditional healers in AIDS education and counselling in  
31 sub-Saharan Africa: a review. *AIDS* 1997;**11 Suppl A**:S217–25.  
32
- 33 30 Homsy J, King R. The role of traditional healers in HIV / AIDS counselling in  
34 Kampala, Uganda. Key issues and debates: traditional healers. *Soc Afr SIDA*  
35 1996;:2–3. PMID: 12179372  
36
- 37 31 Peltzer K, Mngqundaniso N, Petros G. A controlled study of an HIV/AIDS/STI/TB  
38 intervention with traditional healers in KwaZulu-Natal, South Africa. *AIDS Behav*  
39 2006;**10**:683–90. doi:10.1007/s10461-006-9110-x  
40
- 41 32 Makundi EA, Malebo HM, Mhame P, *et al.* Role of traditional healers in the  
42 management of severe malaria among children below five years of age: the case of  
43 Kilosa and Handeni Districts, Tanzania. *Malar J* 2006;**5**:58. doi:10.1186/1475-2875-  
44 5-58  
45
- 46 33 Audet CM, Hamilton E, Hughart L, *et al.* Engagement of Traditional Healers and  
47 Birth Attendants as a Controversial Proposal to Extend the HIV Health Workforce.  
48 *Curr HIV/AIDS Rep* 2015;**12**:238–45. doi:10.1007/s11904-015-0258-8  
49
- 50 34 Horwitz RH, Tsai AC, Maling S, *et al.* No Association Found Between Traditional  
51 Healer Use and Delayed Antiretroviral Initiation in Rural Uganda. *AIDS Behav*  
52 2012;**17**:260–5. doi:10.1007/s10461-011-0132-7  
53  
54  
55  
56  
57  
58  
59

- 1  
2  
3 35 Sundararajan R, Mwanga-Amumpaire J, Adrama H, *et al*. Sociocultural and  
4 Structural Factors Contributing to Delays in Treatment for Children with Severe  
5 Malaria: A Qualitative Study in Southwestern Uganda. *American Journal of Tropical*  
6 *Medicine and Hygiene* 2015;**92**:933–40. doi:10.4269/ajtmh.14-0784  
7
- 8 36 Kyomuhendo GB. Low use of rural maternity services in Uganda: impact of  
9 women's status, traditional beliefs and limited resources. *Reproductive Health*  
10 *Matters* 2003;**11**:16–26. doi:10.1016/S0968-8080(03)02176-1  
11
- 12 37 van Duijl M, Kleijn W, de Jong J. Unravelling the spirits' message: a study of help-  
13 seeking steps and explanatory models among patients suffering from spirit  
14 possession in Uganda. *Int J Ment Health Syst* 2014;**8**:24. doi:10.1186/1752-4458-8-  
15 24  
16
- 17 38 Berger I, Buchanan C. The Cwezi cults and the history of western Uganda. In:  
18 Gallagher JT, ed. *East African Culture History*. Syracuse: Maxwell School of  
19 Citizenship and Public Affairs. 1976.  
20
- 21 39 Palinkas LA, Horwitz SM, Green CA, *et al*. Purposeful Sampling for Qualitative Data  
22 Collection and Analysis in Mixed Method Implementation Research. *Adm Policy*  
23 *Ment Health* 2015;**42**:533–44. doi:10.1007/s10488-013-0528-y  
24
- 25 40 Creswell JW. *Qualitative Inquiry & Research Design*. Sage Publications. 2017.  
26
- 27 41 Patton MQ. *Qualitative Evaluation and Research Methods*. Sage Publications.  
28 1990.  
29
- 30 42 Morse JM. Determining sample size. *Qualitative Health Research*. 2000;**10**:3-5.  
31
- 32 43 Smith JA, Flowers P, Larkin M. *Interpretive Phenomenological Analysis*. Sage  
33 Publications. 2009.  
34
- 35 44 Smith J, Osborn M. Interpretive phenomenological analysis. In: Smith JA, ed.  
36 *Qualitative Psychology*. 2015, 53–80.  
37
- 38 45 Glaser BG, Strauss A. *The Discovery of Grounded Theory: Strategies for*  
39 *Qualitative Research*. Chicago: Aldine. 1967.  
40
- 41 46 Littlewood RA, Venable PA. A Global Perspective on Complementary and  
42 Alternative Medicine Use Among People Living with HIV/AIDS in the Era of  
43 Antiretroviral Treatment. *Curr HIV/AIDS Rep* 2011;**8**:257–68. doi:10.1007/s11904-  
44 011-0090-8  
45
- 46 47 Finkler K. Sacred Healing and Biomedicine Compared. *Medical Anthropology*  
47 *Quarterly* 1994;**8**:178–97. doi:10.1525/maq.1994.8.2.02a00030  
48
- 49 48 Sundararajan R, Kalkonde Y, Gokhale C, *et al*. Barriers to malaria control among  
50 marginalized tribal communities: a qualitative study. *PLoS ONE* 2013;**8**:e81966.  
51 doi:10.1371/journal.pone.0081966  
52  
53  
54  
55  
56  
57  
58  
59  
60

- 1  
2  
3 49 Hampshire K, Hamill H, Mariwah S, *et al*. The application of Signalling Theory to  
4 health-related trust problems: The example of herbal clinics in Ghana and  
5 Tanzania. *Soc Sci Med* 2017;**188**:109–18. doi:10.1016/j.socscimed.2017.07.009  
6
- 7 50 Rolfe A, Burton C. Reassurance after diagnostic testing with a low pretest  
8 probability of serious disease: systematic review and meta-analysis. *JAMA Intern  
9 Med* 2013;**173**:407–16. doi:10.1001/jamainternmed.2013.2762  
10
- 11 51 van Ravesteijn H, van Dijk I, Darmon D, *et al*. The reassuring value of diagnostic  
12 tests: a systematic review. *Patient Educ Couns* 2012;**86**:3–8.  
13 doi:10.1016/j.pec.2011.02.003  
14
- 15 52 Geleto A, Chojenta C, Mussa A, *et al*. Barriers to access and utilization of  
16 emergency obstetric care at health facilities in sub-Saharan Africa-a systematic  
17 review protocol. *Syst Rev* 2018;**7**:60. doi:10.1186/s13643-018-0720-y  
18
- 19 53 Kisitu DK, Eyler LE, Kajja I, *et al*. A pilot orthopedic trauma registry in Ugandan  
20 district hospitals. *J Surg Res* 2016;**202**:481–8. doi:10.1016/j.jss.2015.12.028  
21
- 22 54 Onyemaechi NO, Lasebikan OA, Elachi IC, *et al*. Patronage of traditional  
23 bonesetters in Makurdi, north-central Nigeria. *Patient Prefer Adherence*  
24 2015;**9**:275–9. doi:10.2147/PPA.S76877  
25
- 26 55 Uribe-Leitz T, Jaramillo J, Maurer L, *et al*. Variability in mortality following  
27 caesarean delivery, appendectomy, and groin hernia repair in low-income and  
28 middle-income countries: a systematic review and analysis of published data.  
29 *Lancet Glob Health* 2016;**4**:e165–74. doi:10.1016/S2214-109X(15)00320-4  
30
- 31 56 Bishop D, Dyer RA, Maswime S, *et al*. Maternal and neonatal outcomes after  
32 caesarean delivery in the African Surgical Outcomes Study: a 7-day prospective  
33 observational cohort study. *Lancet Glob Health* 2019;**7**:e513–22.  
34 doi:10.1016/S2214-109X(19)30036-1  
35
- 36 57 Chang LW, Kagaayi J, Nakigozi G, *et al*. Effect of peer health workers on AIDS care  
37 in Rakai, Uganda: a cluster-randomized trial. *PLoS ONE* 2010;**5**:e10923.  
38 doi:10.1371/journal.pone.0010923  
39
- 40 58 Simoni JM, Nelson KM, Franks JC, *et al*. Are peer interventions for HIV efficacious?  
41 A systematic review. *AIDS Behav* 2011;**15**:1589–95. doi:10.1007/s10461-011-  
42 9963-5  
43
- 44 59 Semitala FC, Camlin CS, Wallenta J, *et al*. Understanding uptake of an intervention  
45 to accelerate antiretroviral therapy initiation in Uganda via qualitative inquiry. *J Int  
46 AIDS Soc* 2017;**20**:e25033. doi:10.1002/jia2.25033  
47
- 48 60 Kågesten A, Gibbs S, Blum RW, *et al*. Understanding Factors that Shape Gender  
49 Attitudes in Early Adolescence Globally: A Mixed-Methods Systematic Review.  
50 *PLoS ONE* 2016;**11**:e0157805. doi:10.1371/journal.pone.0157805  
51  
52  
53  
54  
55  
56  
57  
58  
59  
60

- 1  
2  
3 61 Rock A, Barrington C, Abdoulayi S, *et al*. Social networks, social participation, and  
4 health among youth living in extreme poverty in rural Malawi. *Soc Sci Med*  
5 2016;**170**:55–62. doi:10.1016/j.socscimed.2016.10.005  
6  
7 62 Coatsworth-Puspoky R, Forchuk C, Ward-Griffin C. Peer support relationships: an  
8 unexplored interpersonal process in mental health. *J Psychiatr Ment Health Nurs*  
9 2006;**13**:490–7. doi:10.1111/j.1365-2850.2006.00970.x  
10  
11 63 Alberta AJ, Ploski RR, Carlson SL. Addressing challenges to providing peer-based  
12 recovery support. *J Behav Health Serv Res* 2012;**39**:481–91. doi:10.1007/s11414-  
13 012-9286-y  
14  
15 64 Hampshire KR, Owusu SA. Grandfathers, Google, and dreams: medical pluralism,  
16 globalization, and new healing encounters in Ghana. *Med Anthropol* 2013;**32**:247–  
17 65. doi:10.1080/01459740.2012.692740  
18  
19 65 Kayombo EJ, Uiso FC, Mbwambo ZH, *et al*. Experience of initiating collaboration of  
20 traditional healers in managing HIV and AIDS in Tanzania. *J Ethnobiol Ethnomed*  
21 2007;**3**:6. doi:10.1186/1746-4269-3-6  
22  
23 66 Green EC. The participation of African traditional healers in AIDS/STD prevention  
24 programmes. *Trop Doct* 1997;**27 Suppl 1**:56–9. doi:10.1177/00494755970270S117  
25  
26 67 James PB, Wardle J, Steel A, *et al*. Traditional, complementary and alternative  
27 medicine use in Sub-Saharan Africa: a systematic review. *BMJ Glob Health*  
28 2018;**3**:e000895. doi:10.1136/bmjgh-2018-000895  
29  
30 68 Kelak JA, Cheah WL, Safii R. Patient's Decision to Disclose the Use of Traditional  
31 and Complementary Medicine to Medical Doctor: A Descriptive Phenomenology  
32 Study. *Evid Based Complement Alternat Med* 2018;**2018**:4735234–11.  
33 doi:10.1155/2018/4735234  
34  
35  
36  
37

### FIGURE CAPTION

38 Figure 1. Conceptual model showing key factors within various levels (healthcare  
39 provider, healthcare system, peer) influencing individual health behavior within medically  
40 pluralistic contexts. Each factor differentially influences an individual's therapeutic  
41 itinerary. Negative factors may motivate a switch to the other modality, and positive  
42 factors contribute towards continued use of a particular healthcare modality. This model  
43 is not inclusive of all variables that influence health engagement, but illustrates  
44 categories that were described by our participants in driving their healthcare decision  
45 making, specifically regarding decisions to utilize traditional or biomedical care.  
46  
47  
48  
49  
50  
51  
52  
53  
54  
55  
56  
57  
58  
59  
60

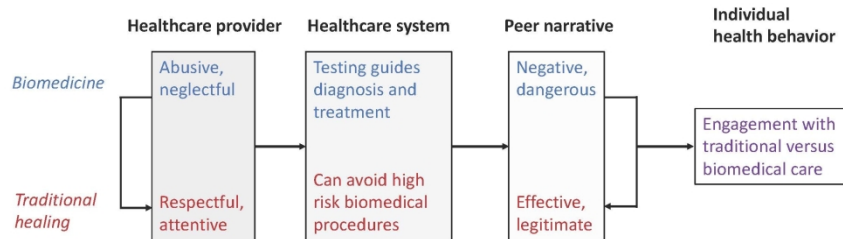

Figure 1. Conceptual model showing key factors within various levels (healthcare provider, healthcare system, peer) influencing individual health behavior within medically pluralistic contexts. Each factor differentially influences an individual's therapeutic itinerary. Negative factors may motivate a switch to the other modality, and positive factors contribute towards continued use of a particular healthcare modality. This model is not inclusive of all variables that influence health engagement, but illustrates categories that were described by our participants in driving their healthcare decision making, specifically regarding decisions to utilize traditional or biomedical care.

338x190mm (200 x 200 DPI)

## Standards for Reporting Qualitative Research (SRQR)\*

<http://www.equator-network.org/reporting-guidelines/srqr/>

Page/line no(s).

### Title and abstract

|                                                                                                                                                                                                                                                              |   |
|--------------------------------------------------------------------------------------------------------------------------------------------------------------------------------------------------------------------------------------------------------------|---|
| <p><b>Title</b> - Concise description of the nature and topic of the study Identifying the study as qualitative or indicating the approach (e.g., ethnography, grounded theory) or data collection methods (e.g., interview, focus group) is recommended</p> | 1 |
| <p><b>Abstract</b> - Summary of key elements of the study using the abstract format of the intended publication; typically includes background, purpose, methods, results, and conclusions</p>                                                               | 2 |

### Introduction

|                                                                                                                                                                     |     |
|---------------------------------------------------------------------------------------------------------------------------------------------------------------------|-----|
| <p><b>Problem formulation</b> - Description and significance of the problem/phenomenon studied; review of relevant theory and empirical work; problem statement</p> | 3-4 |
| <p><b>Purpose or research question</b> - Purpose of the study and specific objectives or questions</p>                                                              | 4   |

### Methods

|                                                                                                                                                                                                                                                                                                                                                                                                             |     |
|-------------------------------------------------------------------------------------------------------------------------------------------------------------------------------------------------------------------------------------------------------------------------------------------------------------------------------------------------------------------------------------------------------------|-----|
| <p><b>Qualitative approach and research paradigm</b> - Qualitative approach (e.g., ethnography, grounded theory, case study, phenomenology, narrative research) and guiding theory if appropriate; identifying the research paradigm (e.g., postpositivist, constructivist/ interpretivist) is also recommended; rationale**</p>                                                                            | 6   |
| <p><b>Researcher characteristics and reflexivity</b> - Researchers' characteristics that may influence the research, including personal attributes, qualifications/experience, relationship with participants, assumptions, and/or presuppositions; potential or actual interaction between researchers' characteristics and the research questions, approach, methods, results, and/or transferability</p> | 6   |
| <p><b>Context</b> - Setting/site and salient contextual factors; rationale**</p>                                                                                                                                                                                                                                                                                                                            | 4-5 |
| <p><b>Sampling strategy</b> - How and why research participants, documents, or events were selected; criteria for deciding when no further sampling was necessary (e.g., sampling saturation); rationale**</p>                                                                                                                                                                                              | 4-6 |
| <p><b>Ethical issues pertaining to human subjects</b> - Documentation of approval by an appropriate ethics review board and participant consent, or explanation for lack thereof; other confidentiality and data security issues</p>                                                                                                                                                                        | 7   |
| <p><b>Data collection methods</b> - Types of data collected; details of data collection procedures including (as appropriate) start and stop dates of data collection and analysis, iterative process, triangulation of sources/methods, and modification of procedures in response to evolving study findings; rationale**</p>                                                                             | 6   |



|    |                                                                                         |     |
|----|-----------------------------------------------------------------------------------------|-----|
| 1  |                                                                                         |     |
| 2  |                                                                                         |     |
| 3  | <b>Data collection instruments and technologies</b> - Description of instruments (e.g., |     |
| 4  | interview guides, questionnaires) and devices (e.g., audio recorders) used for data     |     |
| 5  | collection; if/how the instrument(s) changed over the course of the study               | 5-6 |
| 6  |                                                                                         |     |
| 7  | <b>Units of study</b> - Number and relevant characteristics of participants, documents, |     |
| 8  | or events included in the study; level of participation (could be reported in results)  | 7   |
| 9  |                                                                                         |     |
| 10 | <b>Data processing</b> - Methods for processing data prior to and during analysis,      |     |
| 11 | including transcription, data entry, data management and security, verification of      |     |
| 12 | data integrity, data coding, and anonymization/de-identification of excerpts            | 6-7 |
| 13 |                                                                                         |     |
| 14 | <b>Data analysis</b> - Process by which inferences, themes, etc., were identified and   |     |
| 15 | developed, including the researchers involved in data analysis; usually references a    |     |
| 16 | specific paradigm or approach; rationale**                                              | 6-7 |
| 17 |                                                                                         |     |
| 18 | <b>Techniques to enhance trustworthiness</b> - Techniques to enhance trustworthiness    |     |
| 19 | and credibility of data analysis (e.g., member checking, audit trail, triangulation);   |     |
| 20 | rationale**                                                                             | 6   |

### Results/findings

|    |                                                                                             |      |
|----|---------------------------------------------------------------------------------------------|------|
| 23 | <b>Synthesis and interpretation</b> - Main findings (e.g., interpretations, inferences, and |      |
| 24 | themes); might include development of a theory or model, or integration with                |      |
| 25 | prior research or theory                                                                    | 8-12 |
| 26 |                                                                                             |      |
| 27 | <b>Links to empirical data</b> - Evidence (e.g., quotes, field notes, text excerpts,        |      |
| 28 | photographs) to substantiate analytic findings                                              | 8-12 |
| 29 |                                                                                             |      |

### Discussion

|    |                                                                                           |       |
|----|-------------------------------------------------------------------------------------------|-------|
| 32 | <b>Integration with prior work, implications, transferability, and contribution(s) to</b> |       |
| 33 | <b>the field</b> - Short summary of main findings; explanation of how findings and        |       |
| 34 | conclusions connect to, support, elaborate on, or challenge conclusions of earlier        |       |
| 35 | scholarship; discussion of scope of application/generalizability; identification of       |       |
| 36 | unique contribution(s) to scholarship in a discipline or field                            | 12-15 |
| 37 |                                                                                           |       |
| 38 | <b>Limitations</b> - Trustworthiness and limitations of findings                          | 15    |
| 39 |                                                                                           |       |

### Other

|    |                                                                                            |    |
|----|--------------------------------------------------------------------------------------------|----|
| 42 | <b>Conflicts of interest</b> - Potential sources of influence or perceived influence on    |    |
| 43 | study conduct and conclusions; how these were managed                                      | 16 |
| 44 |                                                                                            |    |
| 45 | <b>Funding</b> - Sources of funding and other support; role of funders in data collection, |    |
| 46 | interpretation, and reporting                                                              | 16 |
| 47 |                                                                                            |    |

\*The authors created the SRQR by searching the literature to identify guidelines, reporting standards, and critical appraisal criteria for qualitative research; reviewing the reference lists of retrieved sources; and contacting experts to gain feedback. The SRQR aims to improve the transparency of all aspects of qualitative research by providing clear standards for reporting qualitative research.

1  
2  
3  
4  
5  
6  
7  
8  
9  
10  
11  
12  
13  
14  
15  
16  
17  
18  
19  
20  
21  
22  
23  
24  
25  
26  
27  
28  
29  
30  
31  
32  
33  
34  
35  
36  
37  
38  
39  
40  
41  
42  
43  
44  
45  
46  
47  
48  
49  
50  
51  
52  
53  
54  
55  
56  
57  
58  
59  
60

\*\*The rationale should briefly discuss the justification for choosing that theory, approach, method, or technique rather than other options available, the assumptions and limitations implicit in those choices, and how those choices influence study conclusions and transferability. As appropriate, the rationale for several items might be discussed together.

**Reference:**

O'Brien BC, Harris IB, Beckman TJ, Reed DA, Cook DA. **Standards for reporting qualitative research: a synthesis of recommendations.** *Academic Medicine*, Vol. 89, No. 9 / Sept 2014  
DOI: 10.1097/ACM.0000000000000388

For peer review only

# BMJ Open

## A conceptual model for pluralistic healthcare behavior: results from a qualitative study in southwestern Uganda

|                                 |                                                                                                                                                                                                                                                                                                                                                    |
|---------------------------------|----------------------------------------------------------------------------------------------------------------------------------------------------------------------------------------------------------------------------------------------------------------------------------------------------------------------------------------------------|
| Journal:                        | <i>BMJ Open</i>                                                                                                                                                                                                                                                                                                                                    |
| Manuscript ID                   | bmjopen-2019-033410.R2                                                                                                                                                                                                                                                                                                                             |
| Article Type:                   | Research                                                                                                                                                                                                                                                                                                                                           |
| Date Submitted by the Author:   | 24-Feb-2020                                                                                                                                                                                                                                                                                                                                        |
| Complete List of Authors:       | Sundararajan, Radhika; Weill Cornell Medical College, Center for Global Health; Weill Cornell Medical College, Emergency Medicine<br>Mwanga-Amumpaire, Juliet; Mbarara University of Science and Technology<br>King, Rachel; UCSF Medical Center, Global Health Sciences<br>Ware, Norma; Harvard Medical School, Global Health and Social Medicine |
| <b>Primary Subject Heading</b>: | Global health                                                                                                                                                                                                                                                                                                                                      |
| Secondary Subject Heading:      | Complementary medicine                                                                                                                                                                                                                                                                                                                             |
| Keywords:                       | COMPLEMENTARY MEDICINE, International health services < HEALTH SERVICES ADMINISTRATION & MANAGEMENT, QUALITATIVE RESEARCH, PUBLIC HEALTH                                                                                                                                                                                                           |
|                                 |                                                                                                                                                                                                                                                                                                                                                    |

SCHOLARONE™  
Manuscripts



I, the Submitting Author has the right to grant and does grant on behalf of all authors of the Work (as defined in the below author licence), an exclusive licence and/or a non-exclusive licence for contributions from authors who are: i) UK Crown employees; ii) where BMJ has agreed a CC-BY licence shall apply, and/or iii) in accordance with the terms applicable for US Federal Government officers or employees acting as part of their official duties; on a worldwide, perpetual, irrevocable, royalty-free basis to BMJ Publishing Group Ltd ("BMJ") its licensees and where the relevant Journal is co-owned by BMJ to the co-owners of the Journal, to publish the Work in this journal and any other BMJ products and to exploit all rights, as set out in our [licence](#).

The Submitting Author accepts and understands that any supply made under these terms is made by BMJ to the Submitting Author unless you are acting as an employee on behalf of your employer or a postgraduate student of an affiliated institution which is paying any applicable article publishing charge ("APC") for Open Access articles. Where the Submitting Author wishes to make the Work available on an Open Access basis (and intends to pay the relevant APC), the terms of reuse of such Open Access shall be governed by a Creative Commons licence – details of these licences and which [Creative Commons](#) licence will apply to this Work are set out in our licence referred to above.

Other than as permitted in any relevant BMJ Author's Self Archiving Policies, I confirm this Work has not been accepted for publication elsewhere, is not being considered for publication elsewhere and does not duplicate material already published. I confirm all authors consent to publication of this Work and authorise the granting of this licence.

1  
2  
3 **A conceptual model for pluralistic healthcare behavior: results from a qualitative**  
4 **study in southwestern Uganda**  
5

6 Radhika Sundararajan MD, PhD<sup>1,2\*</sup>  
7 Juliet Mwanga-Amumpaire, MD, MS<sup>3</sup>  
8 Rachel King, PhD, MPH<sup>4</sup>  
9 Norma C. Ware, PhD<sup>5,6</sup>  
10

11 1. Department of Emergency Medicine, Weill Cornell Medicine, 525 East 68<sup>th</sup> Street,  
12 New York, 10065, USA, ras9199@med.cornell.edu; 212-746-0780

13 2. Weill Cornell Center for Global Health, New York, USA

14 3. Mbarara University of Science and Technology, Mbarara, Uganda

15 4. Global Health Sciences, University of California San Francisco, USA

16 5. Department of Medicine, Brigham and Women's Hospital, Boston, USA

17 6. Department of Global Health and Social Medicine, Harvard Medical School, Boston  
18 USA

19 \*corresponding author  
20  
21  
22  
23  
24  
25  
26  
27  
28  
29  
30  
31  
32  
33  
34  
35  
36  
37  
38  
39  
40  
41  
42  
43  
44  
45  
46  
47  
48  
49  
50  
51  
52  
53  
54  
55  
56  
57  
58  
59  
60

**ABSTRACT**

**Introduction:** *Medical pluralism*, or concurrent utilization of multiple therapeutic modalities, is common in various international contexts, and has been characterized as a factor contributing to poor health outcomes in low-resource settings. Traditional healers are ubiquitous providers in most regions, including the study site of southwestern Uganda. Where both informal and formal healthcare services are both available, patients do not engage with both options equally. It is not well understood why patients choose to engage with one healthcare modality over the other. The goal of this study was to explain therapeutic itineraries and create a conceptual framework of pluralistic health behavior.

**Methods:** In-depth interviews were conducted from September 2017 – February 2018 with patients seeking care at traditional healers (N=30) and at an outpatient medicine clinic (N=30) in Mbarara, Uganda; the study is nested within a longitudinal project examining HIV testing engagement among traditional healer-utilizing communities. Inclusion criteria included age  $\geq 18$  years, and ability to provide informed consent. Participants were recruited from practices representing the range of healer specialties. Following an inductive approach, interview transcripts were reviewed and coded to identify conceptual categories explaining healthcare utilization.

**Results:** We identified three broad categories relevant to healthcare utilization: 1) traditional healers treat patients with “care”; 2) biomedicine uses “modern” technologies; and 3) peer “testimony” influences healthcare engagement. These categories describe variables at the healthcare provider, healthcare system, and peer levels that interrelate to motivate individual engagement in pluralistic health resources.

**Conclusions:** Patients perceive clear advantages and disadvantages to biomedical and traditional care in medically pluralistic settings. We identified factors at the healthcare provider, healthcare system, and peer levels which influence patients’ therapeutic itineraries. Our findings provide a basis to improve health outcomes in medically pluralistic settings, and underscore the importance of recognizing traditional healers as important stakeholders in community health.

**Keywords:** Medical pluralism, Uganda, traditional healers, qualitative

## STRENGTHS AND LIMITATIONS OF THIS STUDY

- This study illuminates factors that motivate engagement with healthcare resources by using data from biomedical and traditional medicine utilizers
- This study employed qualitative methods to explore participants' own experiences of healthcare modalities, and identify perceived advantages and disadvantages of each form of healing
- While the data gathered is highly contextual and specific to the study context, the conceptual model presented offers a broad application to other medically pluralistic communities
- This conceptual model could be used to guide healthcare initiatives, policies, and research in pluralistic settings

## INTRODUCTION

*Medical pluralism*, or utilization of multiple therapeutic modalities, is common where both biomedical and complementary or alternative treatments are available to patients. This pattern of healthcare engagement is observed in both high-[1-3] and low-resource settings[4-6], and is well described for patients with both acute[7] and chronic illness[8-10] in various international contexts. In low- and middle-income countries, complementary and alternative healthcare services are often provided by traditional healers, who practice outside of the formal biomedical system. Traditional healers are broadly defined by the World Health Organization as: 1) persons recognized by local community as healers; 2) having regular patient attendance; and 3) having space to receive and treat patients[11,12]. They “provide health care by using plant, animal and mineral substances, and other methods based on social, cultural, and religious practices”[13,14]. It is estimated that 80% of the population in sub-Saharan Africa visit traditional healers[15].

As such, traditional healers are an initial point of contact for patients in medically pluralistic settings. Patients may prefer informal health services from traditional healers because of their increased accessibility: healers are present in higher numbers than physicians and biomedical facilities, particularly in low-resource settings[16,17]. However, their popularity cannot be strictly explained by convenience. Research in urban regions having high density of biomedical institutions demonstrates similar reliance on traditional healers[16-18]. Patients may also seek out traditional therapies to address symptoms attributed to ancestral curses or bewitching, believed incurable by biomedicine[19]. Use of traditional medicine is also strongly tied to local religious and ethnic identities[20]. Patients may pursue traditional healing in the setting of biomedicine treatment “failure”, when symptoms worsen or persist despite ongoing therapies[21,22].

Prior research has shown that traditional healer use is a factor contributing to poor health outcomes among patients. For example, receiving care from a traditional healer has been shown to delay HIV testing and antiretroviral therapy (ART) initiation[23], and interrupt HIV treatment[22] for people living with HIV (PLHIV). In Mozambique, PLHIV initially seeking care from traditional healers experienced significantly longer delays to diagnosis compared with those who did not utilize healers; this delay exponentially grew with corresponding increases in the number of healers consulted prior to receiving HIV testing[23]. In South Africa, medical pluralism was shown to be negatively associated with ART use in a cohort of PLHIV[24]. Use of traditional healers was also identified as an important variable contributing to the recent Ebola outbreak in West Africa[25]. Studies have demonstrated that medical pluralism similarly contributes to poor outcomes

1  
2  
3 for non-infectious diseases, such as nonadherence to chemotherapy for cancer[26,27],  
4 or poor outpatient linkage to care for patients with hypertension[28].  
5

6 Because they are frequently consulted for most types of illness, traditional healers could  
7 be important allies for public health initiatives. Some programs have attempted to  
8 engage with healers for these purposes, which have included trainings for healers to  
9 deliver counseling and facility referral for HIV[29,30], TB[31], or malaria testing[32], or to  
10 increase uptake of prenatal care[33]. However, in most cases, program effectiveness  
11 has been limited by the fact that patients may not complete referrals to facilities. These  
12 findings highly the fact that where both informal and formal healthcare services are  
13 available, patients do not engage with both options equally.  
14

15  
16 There remains a critical lack of understanding about why patients choose to utilize one  
17 healthcare resource, but not another. It is clear that biomedicine and traditional healing  
18 offer distinctive forms of healthcare for patients. But there is a dearth of knowledge on  
19 perceived advantages and disadvantages of each modality from the perspective of the  
20 healthcare user. Without this information, healthcare initiatives in pluralistic settings  
21 cannot be truly “patient-centered”, and are at risk for failure. The goal of this study was  
22 to identify factors that motivate engagement with healthcare resources, using qualitative  
23 research methods. We sought to explain therapeutic itineraries by conducting interviews  
24 with users of biomedical and traditional healthcare resources. These data were used to  
25 develop a general, conceptual framework that can inform future work in medically  
26 pluralistic settings.  
27

## 28 **METHODS**

### 29 **Study Setting and Design**

30  
31 This qualitative study was conducted in Mbarara District, Uganda, a rural district of  
32 418,000 residents located ~275 km southwest of the capital city of Kampala.  
33 Southwestern Uganda is a medically pluralistic context, where both traditional and  
34 biomedical modalities of healthcare co-exist[34-36]. In this region of sub-Saharan Africa,  
35 traditional healers practice herbalism and spiritual healing; they also set broken bones  
36 and attend births in the community. Spiritual healers attribute their powers to the  
37 *Bachwezi*, which are believed to be ancestral spirits from an ancient kingdom that  
38 previously occupied this region of eastern Africa[37,38]. In Uganda, traditional healing is  
39 not formally recognized by the Ministry of Health; there is no centralized oversight of  
40 traditional healing training programs or services. This research was conducted as part of  
41 a multi-year, mixed methods study of HIV services engagement in a medically pluralistic  
42 community.  
43  
44

### 45 **Sampling and Recruitment**

46 Following a purposive sampling strategy, sixty (N=60) adults were identified to  
47 participate as key informants in this study, or “individuals that are especially  
48 knowledgeable about or experienced with a phenomenon of interest”[39]. In our case,  
49 key informants were selected to represent variation in experiences of receiving  
50 modalities of healthcare: biomedical and traditional. That is, participants were patients  
51 representing two subgroups: (1) individuals receiving treatment from traditional healers  
52 (N=30), and (2) individuals receiving treatment from a biomedical general medicine  
53 outpatient clinic (N=30). Inclusion criteria for all participants were: 1) age ≥18 years; 2)  
54 ability to provide informed consent; and 3) seeking healthcare at either a traditional  
55 healer or outpatient biomedical clinic in Mbarara District.  
56  
57  
58  
59  
60



1  
2  
3  
4 Both verbal and written informed consent were obtained by Ugandan research  
5 assistants (RAs) prior to enrollment. After verbally reviewing the consent form, research  
6 staff used a 5-item questionnaire to assess whether the potential participant understood  
7 the study and consent process. This questionnaire posed questions critical to  
8 demonstrating consent, such as “How much time will this take you?”; “What are the  
9 possible benefits for you?”. If a potential participant demonstrated errors in  
10 understanding, these were corrected, and potential participants asked if they needed  
11 further clarification. If, after further attempts to clarify misunderstandings, study staff  
12 determined that the potential participant did not comprehend the consent process, or  
13 critical aspects of the study, they were not enrolled.  
14

15  
16 Participants in the traditional medicine subgroup were recruited from twelve traditional  
17 healer practices which reflected the range of specialties in this region (herbalist, bone  
18 setter, traditional birth attendant, and spiritual healer). All were located within 20  
19 kilometers of Mbarara town center. It is well established that men tend to have low  
20 uptake of in healthcare services in sub-Saharan Africa[1-3]. In order to ensure that male  
21 perspectives were represented, we recruited two-thirds of participants at healer practices  
22 who were known to provide services for men. Therefore, more bonesetter and spiritual  
23 healer patients are included in the traditional healer group. For the purposes of this  
24 study, we excluded Christian-based spiritual healers (i.e., “Born Again” or Pentecostal  
25 ministers). Participants in the biomedical subgroup were recruited from Mbarara  
26 Municipality Clinic, a general outpatient government-run clinic in the town of Mbarara,  
27 which serves approximately 50,000 patients per year. Services at this clinic are provided  
28 free of charge.  
29

30  
31 At both traditional and biomedical facilities, RAs approached patients following  
32 completion of visits to assess eligibility and interest in participation. Potential participants  
33 were individually recruited by RAs, who visited recruitment sites once per week during  
34 business hours to screen for eligible patients. Recruitment visits were scheduled on  
35 random days of the week to maximize variation of participants included in this study. A  
36 maximum of two participants was enrolled during each site visit in order to allow ample  
37 time to review informed consent and conduct minimally-structured interviews. This  
38 approach ensured interview quality, and was central to the inductive data analysis  
39 process by providing time to review interview content, provide feedback to RAs, and  
40 identify preliminary codes (see “Data Collection” and “Analysis of Data” sections for  
41 more details). Biomedical clinic leadership and traditional healers gave permission for  
42 study staff to recruit patients at their practices. Recruitment was carried out over a period  
43 of six months (September 2017 - February 2018).  
44

45  
46 A target sample size of 30 participants per subgroup was guided by prior research  
47 suggesting that a range between 20 and 30 interviews is adequate to reach *thematic*  
48 *saturation*, the point at which no new concepts emerge from subsequent interviews[40-  
49 42]. After 30 interviews per group were conducted, the study authors agreed that  
50 thematic saturation had been reached, and interview content no longer contained new or  
51 surprising content.  
52

### 53 **Data Collection**

54 Three Ugandan Research Assistants (RAs) with prior experience in conducting  
55 qualitative interviews in southwestern Uganda collected data for this study. Prior to  
56 initiation of data collection, all RAs took part in a three-day training session led by RS  
57  
58  
59

1  
2  
3 and JMA, which focused on the principles of qualitative research, approaches to  
4 conducting high quality interviews, and establishing standard procedures for interview  
5 translation and transcription. In addition, the RAs underwent intensive training with  
6 interview guide questions to ensure consistency of delivery and use throughout the  
7 study.  
8

9  
10 Each study participant took part in a single, individual, in-depth interview with one of  
11 these RAs. Interviews were conducted following an interview guide that included the  
12 following topics: 1) details of the patient's therapeutic itinerary for his/her current  
13 symptoms; 2) symptoms that motivated him/her to seek healthcare; 3) attitudes towards,  
14 and experiences with, traditional and biomedicine; and 4) details of concurrent or recent  
15 biomedical and traditional healer visits. The interview guide was created in English,  
16 translated to the local language (Runyankore), and back-translated into English to verify  
17 preservation of meaning. In addition, the interview guide was piloted with three  
18 traditional healers prior to initiation of data collection in August 2017; these responses  
19 were not included in our analysis.  
20

21 Interviews lasted approximately one hour and were conducted in the local language  
22 (Runyankore), in private locations at either healer practices or at the participating  
23 biomedical clinic. Participants received the equivalent of 10,000 Ugandan Shillings  
24 (UGX, ~\$3 USD) in household staples (cooking oil, sugar, salt, soap) in recognition of  
25 the time and effort required to participate in the interview.  
26

27 Interviews were digitally recorded, then transcribed and translated into English by the  
28 same RA who had conducted the interview. All transcripts were produced within 72  
29 hours of the interview being completed. The transcripts were reviewed by the first author  
30 for quality, content, and to provide feedback to the RAs regarding interviewing  
31 techniques. This monitoring process allowed for RAs to receive consistent feedback to  
32 improve interviewing skills to ensure that interviews were of high quality, explored  
33 participants unique experiences, and facilitated consistency on interview guide topics  
34 across interviewers. English transcripts were spot-checked against audio recordings by  
35 an author (JMA, who is fluent in Runyankore and English) to ensure validity and integrity  
36 of translations.  
37

### 38 39 **Analysis of Data**

40 A three-step, inductive approach was used to analyze the qualitative data, as follows: (1)  
41 development of codes; (2) coding; and (3) category construction. We employed an  
42 interpretive phenomenological approach to data analysis[43,44], as the goal of this study  
43 was to explore participants' own experiences and perspectives on healthcare  
44 engagement.  
45

#### 46 **Development of Codes.**

47 Two authors (RS and JMA) reviewed transcripts within 72 hours of completion and  
48 corresponded weekly to identify and discuss emerging concepts. Guided by these  
49 discussions, the first author (RS) produced an initial set of codes, or labels that  
50 described key concepts in the dataset. Using an inductive strategy, this process was  
51 conducted while interviews were ongoing, providing overlap between qualitative  
52 interviewing and data analysis, allowing for iterative engagement with the dataset to  
53 identify concepts of interest. As additional transcripts were produced and reviewed,  
54 codes were reviewed and refined to fit the data. Using the "constant comparison"  
55 method, newly coded text segments were compared to text segments previously marked  
56  
57  
58  
59  
60

with the same code to determine if they reflected the same concept[45]. This process was repeated until all transcripts had been reviewed. A final list of codes was produced through discussion and consensus among three co-authors (RS, JMA and RK).

#### Coding:

All study transcripts were coded, and re-coded when necessary, using the finalized list of codes. QSR NVivo 11 (QRS International Pty Ltd) was used for coding and data organization, but not in development of codes.

#### Category Construction:

Next, coded data were examined and grouped to form conceptual categories, where data are aggregated based on similarities of meaning. Categories are defined below using text examples. Quotes from participants are shown as italicized and indented. Interrelationships between categories were identified to create a conceptual framework illustrating factors that influence health behavior in a pluralistic context (Figure 1).

#### Ethical Statement:

This research was approved by the Human Research Protections Program Institutional Research Board at the University of California, San Diego (#170672), Weill Cornell Medical College (#1803019105), Mbarara University of Science and Technology Research Ethics Committee (#16/01-17) and the Ugandan National Council for Science and Technology (#SS4338). Participants provided written and verbal informed consent in Runyankore.

## RESULTS

### Characteristics of Participants

| Characteristic                                           | Traditional healer clients (N=30)                                                                | Biomedical clients (N=30)                                         |
|----------------------------------------------------------|--------------------------------------------------------------------------------------------------|-------------------------------------------------------------------|
| Report previously receiving care from alternate modality | N=30 (100%)                                                                                      | N=2 (7%)                                                          |
| Age (in years)                                           | 30 (median)<br>IQR = 20                                                                          | 28.5 (median)<br>IQR = 10.75                                      |
| Female gender (%)                                        | N = 16 (53%)                                                                                     | N= 18 (60%)                                                       |
| Primary school education or less                         | N= 14 (47%)                                                                                      | N = 13 (43%)                                                      |
| Household size (in persons)                              | 5 (median)<br>IQR = 3                                                                            | 4.5 (median)<br>IQR = 3.5                                         |
| Marital status                                           | Single (N = 7)<br>Married/Cohabiting (N = 21)<br>Widowed (N = 2)                                 | Single (N = 11)<br>Married/Cohabiting (N = 17)<br>Widowed (N = 2) |
| Christian religion                                       | N = 25 (83%)                                                                                     | N = 23 (77%)                                                      |
| Monthly household income (in USD)                        | \$41 (median),<br>IQR = 76                                                                       | \$22 (median)<br>IQR = 46                                         |
| Type of healer visited on day of enrollment              | Spiritualist (N=12)<br>Bonesetter (N=10)<br>Traditional birth attendant (N=4)<br>Herbalist (N=4) | N/A                                                               |

Characteristics of study participants appear in Table 1. Over half of the sample had clinical experience with both biomedical and traditional modalities of healthcare. However, pluralistic behaviors were much more commonly reported among patients of traditional healers. Only two participants recruited from the biomedical clinic reported prior experience receiving care from traditional healers (n=2/30, 7%); in contrast, all (n=30) traditional healer patients reported prior experience receiving biomedical treatment.

Participants recruited from healer practice locations were slightly older, with a higher

proportion being married, and with higher reported monthly incomes, compared to the

1  
2  
3  
4  
5  
6  
7  
8  
9  
biomedicine group. Biomedical participants were recruited from a government-run medical clinic, where they received health services at no cost. Therefore, we would expect lower household incomes, as they have preferentially sought to receive free medical care, rather than present to a fee-for-service facility. Other characteristics, including gender, household size, highest level of education, and religious affiliation, were similar between the two groups.

## 10 **Qualitative Results**

### 11 Overview

12 Our qualitative data indicate important perceived advantages and disadvantages to both  
13 healthcare modalities, which motivate patient engagement with available resources. We  
14 have developed three broad categories representing influences on therapeutic itineraries  
15 that were evident in the data. They are summarized as follows: 1) traditional healers  
16 treat patients with “care”; 2) biomedicine uses “modern” technologies; and 3) peer  
17 “testimony” influences healthcare engagement. Within each of these categories, we  
18 provide examples to illustrate how these factors drive plural healthcare engagement. We  
19 consider each one separately, below, and then present a conceptual model for how  
20 these factors interrelate to create therapeutic itineraries in southwestern Uganda.  
21  
22

#### 23 A. *Traditional healers care about their patients*

24 Patients recruited from traditional healers report positive experiences with their care,  
25 specifically describing that treatments effectively relieve their symptoms. Participants  
26 state that they prefer traditional therapies because traditional practitioners “heal faster”.  
27 This efficient healing is sometimes attributed to the fact that traditional practitioners  
28 spend more time personally treating and caring for their patients, compared with  
29 healthcare workers in biomedical settings:  
30

31 *Those [bonesetters] are super! They heal faster than biomedical. When you*  
32 *take your patient to a bonesetter, he does not take long to get healed, compared*  
33 *to one in the hospital. In hospitals, the healing process is long because they do*  
34 *not do much more than hanging you there [in traction] and leave you. You can*  
35 *even become lame because they do not check to see whether you are healing or*  
36 *not. But for the healer, he does his reviews [checks your wound healing]*  
37 *constantly. (Bonesetter patient, female)*  
38  
39

40 Patients receiving traditional care also state that they are treated with respect when  
41 visiting healers, and that healers are motivated to care for patients, rather than being  
42 strictly economically driven. Participants reported that healers attend to patients  
43 immediately, even if they did not have money; a few participants stated that healers  
44 allowed them to pay for services rendered in installments, or in kind (through farm  
45 goods). A participant seeking care from a traditional birth attendant described her  
46 preference for traditional healing, emphasizing the kindness of her practitioner:  
47

48 *[The healer] does everything for you. Her services are excellent. In fact, when*  
49 *you deliver [your children] from here, you do not even think of going elsewhere*  
50 *another time. She cares so much about her clients. In fact, for all my*  
51 *pregnancies, I received antenatal care from this healer. She is my neighbor, and*  
52 *instead of going to sit at the hospital the whole day waiting for checkup, I come*  
53 *here. She is my neighbor and her services are good. So, I come get my antenatal*  
54 *checkup, and go back home to do my chores. (Traditional birth attendant patient,*  
55 *female)*  
56  
57  
58  
59  
60

1  
2  
3  
4 In contrast, patients describe experiences with biomedicine with narratives of disrespect,  
5 mistreatment, neglect or “abuse”. The central message of these biomedical testimonies  
6 is that healthcare workers do not care about their patients. In some cases, participants  
7 referred to these accounts while explaining why they tend to avoid biomedical facilities.  
8 A woman describes her experience receiving antenatal care at the local hospital:  
9

10  
11 *I came to this hospital for antenatal care and found a nurse who treated me*  
12 *badly. She would tell you to lay on the bed and instead of telling you what to do,*  
13 *she would shout at you and say, “Don’t face me! Face the other side!” in a loud*  
14 *voice, and you wonder what the problem was. She embarrassed me and I felt*  
15 *ashamed. I promised myself never to return in this hospital .... She would only*  
16 *shout at us. She was horrible. (Biomedical patient, female)*  
17

18 A number of participants describe experiences at biomedical facilities where they are  
19 never attended to by biomedical staff, despite waiting for many hours – sometimes  
20 spending the entire day without receiving medical attention. These hours spent waiting  
21 come at the expense of childcare, household duties and income-generating activities.  
22 One man describes his experience seeking biomedical care for a toothache as follows:  
23

24  
25 *I went to the referral hospital and spent there the whole day without treatment.*  
26 *The following morning, when I went back, I was given only Panadol*  
27 *[Acetaminophen]. I felt so sad. (Biomedical patient, male)*  
28

29 Another patient states that he gave up after waiting all day for a voluntary circumcision  
30 procedure:

31  
32 *You reach there and sit for the whole day without treatment. Drugs are never*  
33 *there and health workers do not attend to patients as it should be. They arrive at*  
34 *work late and leave work early. They are really bad. I went [to the clinic] one time*  
35 *for circumcision and sat there for many hours until I got hungry and gave up. I left*  
36 *without seeing any doctor. (Bonesetter patient, male)*  
37

### 38 B. Biomedicine uses modern technologies to heal

39 Participants state that biomedical care is preferred in instances where “modern”  
40 technologies can be utilized to provide a diagnosis for one’s symptoms, and guide  
41 treatment. Through blood and radiological tests, healthcare providers can identify the  
42 specific cause of a patient’s illness, and provide appropriate care. Patients perceive that  
43 the information generated by biomedical technology validates the therapies administered  
44 to them:  
45

46  
47 *They use machines to diagnose and test for conditions. They give the right*  
48 *medical information. (Biomedical patient, male).*  
49

50 Having received a specific diagnosis, participants also believe that the treatment  
51 recommended by healthcare workers will be effective in alleviating their symptoms. For  
52 example, one participant described how appropriate medicines have the capacity to  
53 heal, even if taken in small amounts:  
54

55  
56 *When you come [to the clinic] you get diagnosed and they write for you a*  
57 *prescription and you get the medicine then their service is good ... Even if you*  
58  
59  
60

1  
2  
3 *get very little medicine from them and take it, you get healed. (Biomedical*  
4 *patient, female)*  
5

6 Another patient explains why the capacity to intervene with modern biomedical  
7 technology is more effective in treating symptoms than traditional medicine:  
8

9 *Biomedical facilities are good ... when you are, for instance, in a critical*  
10 *condition, they can put you on life support machines, or they can put you on a*  
11 *drip. They can also give you tablets and injections that can help you. Traditional*  
12 *healers can't manage something like that. They don't have modern equipment.*  
13 *They don't have tablets, and they don't have drips and injections. (Bonesetter*  
14 *patient, male)*  
15

16  
17 Results from biomedical testing guide what some participants describe as “proper”,  
18 effective treatment, compared with traditional healing where therapies are provided in  
19 the absence of any diagnostic testing:  
20

21 *[Biomedical facilities] diagnose you and inform you of the ailment that you are*  
22 *suffering from, and at times inform you that your health is okay ... When you visit*  
23 *biomedical health facilities they diagnose you and inform you of your results and*  
24 *in case you are HIV positive, you can start on medicine ... [Traditional healers]*  
25 *don't have equipment to diagnose, so how do they diagnose for conditions? ... I*  
26 *don't trust them. (Biomedical patient, Female)*  
27

28 While biomedicine is favored for its use of diagnostic technologies, other participants  
29 describe preference for traditional healing *specifically because* these approaches could  
30 enable avoidance of biomedical procedures, which participants describe as  
31 “unnecessary” and having high morbidity and mortality. Participants state that an  
32 advantage of traditional healing is that it supports the body to heal “naturally”, rather  
33 requiring modern, invasive interventions. Participants report seeking traditional care after  
34 having been told by biomedical providers that they would require an operation in order to  
35 recover. Those who ultimately healed after receiving traditional care declared that  
36 biomedical providers rush to use modern technologies, instead of allowing the body to  
37 heal on its own. One patient describes his experience receiving care from a bonesetter,  
38 after suffering severe extremity fractures after falling from a motorcycle:  
39  
40

41 *[The hospital staff] told me that the doctors will cut off my leg because it was*  
42 *badly injured and that there was no way they could fix it ... When we reached*  
43 *[this healer], they told me that the bone that joins the knee was broken but*  
44 *promised that since I was in that place, in two to three weeks, I will be able to*  
45 *walk again. They then aligned my leg and started the treatment ... I am now*  
46 *getting better. If I had remained at the hospital, I know my leg would have been*  
47 *cut off by now. (Bonesetter patient, male)*  
48

49 Another patient describes how effective treatment from an herbalist allowed her sister to  
50 avoid a Caesarean section with her twin pregnancy:  
51

52 *These healers are very useful ... my elder sister had a problem with her twin*  
53 *pregnancy. She was stuck with the pregnancy because the babies could not*  
54 *move. They took her to one of the traditional healers and was given medicine*  
55 *which helped her so much and she delivered her babies without difficulties. We*  
56  
57  
58  
59

1  
2  
3 *thought she would be operated on while giving birth [via Caesarean section]*  
4 *because the doctors at referral hospital had told her that she will not manage to*  
5 *push and advised her to go for an operation, which did not happen because of*  
6 *the medicine the healer gave her. (Spiritual healer patient, female)*  
7

8 Participants described fear of utilizing biomedical facilities to deliver their children, as  
9 they believed that physicians would perform unnecessary Caesarian sections,  
10 considered a high-risk procedure for both mothers and infants:  
11

12 *[Doctors] rush women to the operating theatre when it's not necessary. Many*  
13 *women and babies have lost their lives due to the negligence of doctors. Women*  
14 *fear to deliver from hospital. (Spiritual healer patient, male)*  
15

### 16 C. Peer “testimony” influences healthcare engagement

17 Our participants recount social narratives, or “testimonies” which describe healthcare  
18 experiences among peers within their communities. These discursive events evaluate a  
19 provider’s competence and effectiveness in addressing ailments, and describe negative  
20 or positive outcomes of treatments. Participants indicate that peer testimonies strongly  
21 influence where they choose to seek care for their symptoms. We found that biomedical  
22 narratives frequently reinforced individual reports of mistreatment; in contrast, narratives  
23 about traditional healing were generally positive and affirmed the “real” nature of this  
24 form of healthcare.  
25

26  
27 Numerous participants who received care from traditional healers describe negative peer  
28 narratives about biomedicine. A participant describes the testimony from his neighbor  
29 that influenced his decision to seek care from a traditional bonesetter:  
30

31 *My neighbor reached [the referral hospital after injuring his leg], but nothing much*  
32 *was done. They made him sit on the waiting bench and the doctor told the*  
33 *caretaker to go and buy a bandage and find an empty box. The doctor then*  
34 *dismantled the box and tied it on the leg using the bandage and left him there.*  
35 *He remained there until morning. .... He never got any treatment [for the leg*  
36 *injury] apart from the empty boxes they tied on the leg. I will never forget what he*  
37 *experienced from the referral hospital. It was so bad and so discouraging. Health*  
38 *workers do not care about patients. (Bonesetter patient, male)*  
39  
40

41 A number of participants recalled community narratives indicating that healthcare  
42 workers would intentionally withhold treatment or harm their patients. One woman  
43 seeking care at a traditional birth attendant practice describes stories that made her fear  
44 that she would be harmed at the hands of healthcare workers:  
45

46 *There was a woman in labor who was supposed to be taken to the operating*  
47 *theatre but the nurses asked her for money, which she did not have. They*  
48 *refused to work on her until other patients contributed some money and gave it to*  
49 *the nurses ... Those nurses do not mind whether you die from there or not ...*  
50 *There is also one mother I heard about who took her child for immunization and*  
51 *got an argument with the nurse. Intentionally the nurse gave the child overdose*  
52 *and the child died. Some of these health workers are so wicked. (Herbalist*  
53 *patient, female)*  
54  
55  
56  
57  
58  
59  
60

1  
2  
3 Negative peer testimonies were not limited to patients of healers. For example, one  
4 woman seeking biomedical care told a story about her neighbor suffering mistreatment  
5 at the same facility.  
6

7 *My pregnant neighbor delivered her baby in the village compound. [When they*  
8 *arrived at this hospital for post-partum care], the nurse abused her, saying that*  
9 *she should take her stupidity back to her village. They do not care. (Biomedical*  
10 *patient, female).*  
11

12 In stark contrast to narratives surrounding biomedical care, peer testimony surrounding  
13 traditional healing is largely positive. Healers are lauded for their effective care, and  
14 patients are guided by peer testimonials in selecting which healer to visit for their  
15 ailments. One participant seeking care at a traditional herbalist describes the impact of  
16 peer endorsements on her decision to seek care from this particular healer:  
17

18 *This healer is popular and well known, and wherever you go, people will*  
19 *recommend her to treat your sick child ... I have seen so many different people*  
20 *come here to receive treatment ... I am impressed. (Spiritual healer patient,*  
21 *male).*  
22  
23

24 A central concept in many testimonies about traditional medicine is the genuineness of  
25 the healer, and how they should be set apart from traditional healers who may be “fake”  
26 or “quacks”. One participant describes how testimonies from peers with similar injuries  
27 directed him to seek care from a specific bonesetter, and how testimonies generate  
28 more patients for particular healers:  
29

30 *Most traditional healers are quacks, and personally I don't trust them.*  
31 *[Interviewer: Then how do you know that you will heal from this treatment?]*  
32 *I get the confidence from other people who have been treated here. There is a*  
33 *man from a nearby dairy. He bones were more severely broken than mine, but*  
34 *he healed from here, and is now doing his work. I have heard many people's*  
35 *testimonies that they have been healed from here ... When I come here and get*  
36 *healed, I will direct another one because he will be healed too and that person*  
37 *will also direct others... A healer who is real does not need to advertise on the*  
38 *radios because the people they heal create market for them. (Bonesetter patient,*  
39 *male)*  
40  
41

#### 42 *D. Conceptual Model*

43 Figure 1 presents a conceptual model integrating our findings to show how influences at  
44 the healthcare provider, healthcare system, and peer levels influence individual  
45 engagement with healthcare in pluralistic settings. These variables interact to shape an  
46 individual's therapeutic itinerary, but not necessarily in a stepwise manner. For  
47 healthcare users, one or more characteristics of a healthcare system may be of  
48 paramount importance in determining use of this resource, but each modality comes with  
49 potential disadvantages. Negative experiences could prompt users to switch to the  
50 alternate modality. We heard this process described by participants who believed their  
51 ailments were initially mismanaged by biomedical providers, and were subsequently  
52 healed using traditional approaches. Similarly, positive experiences contribute towards  
53 continued use of a healthcare modality, and an individual may become reticent to  
54 engage with the alternative in light of continued positive health outcomes.  
55  
56  
57  
58  
59  
60



## DISCUSSION

This study identified variables that drive engagement with healthcare resources in a medically pluralistic setting, and identified three central factors that contribute to therapeutic pluralism. These may be summarized as follows: 1) traditional healers care about their patients, while biomedical providers do not; 2) biomedical technologies can provide diagnosis and guide treatment, but these technologies are sometimes intentionally avoided; and 3) peer testimonies influence healthcare utilization, largely in favor of traditional healing. These can be considered conceptually as factors operating at the healthcare provider, healthcare system, and peer levels (Figure 1).

Our work illustrates how healthcare provider characteristics are of central importance to patients. The quality of interpersonal interactions can either motivate or deter engagement with healthcare services. We found that patient-provider interactions with traditional healers are described as generally respectful and supportive, while patient-provider interactions in biomedical contexts included narratives of neglect and “abuse”. These findings align prior work showing that initial choice of therapeutic modality in pluralistic contexts is driven by perceived trustworthiness of a healthcare provider[22,46-49]. Our participant accounts of negative interactions with biomedical staff are congruent with prior work linking negative interactions with disengagement with HIV care among people living with HIV[4-6], decreased HIV pre-exposure prophylaxis (PrEP) utilization among key populations[7] and lack of healthcare facility use among pregnant women[8-10].

We also describe how some characteristics of the available healthcare systems impact healthcare engagement. Our results speak to the hegemony of biomedicine in Uganda, and more broadly throughout post-colonial sub-Saharan Africa, where biomedicine is highly valued, and may be considered of superior quality and efficacy compared with traditional healing[11,12]. Some participants report gaining reassurance through laboratory and radiologic testing to guide diagnosis and therapy, describing this as “proper” treatment. We note that the desire for healthcare directed by “modern” test results is the central factor favoring biomedical healthcare utilization among our participants. Interestingly, other data from high-resource contexts has shown that diagnostic test results do not increase patient reassurance or decrease health-related anxiety in outpatient biomedical settings[50,51]. However, in our medically pluralistic study site, the capacity of biomedical facilities to perform diagnostic testing is distinctive in contrast to traditional medicine approaches, and therefore some patients consider access to testing as a benefit.

Traditional healthcare is sometimes preferred as a means to avoid invasive procedures, such as orthopedic fixation, limb amputation, or Caesarean section. Our findings are congruent with prior research demonstrating avoidance of facility-based obstetric services, preference for traditional home birth[10,36,52], and bonesetters to heal orthopedic injuries in sub-Saharan Africa[53,54]. Motivation to avoid invasive operative procedures is further explained by poor post-operative outcomes throughout sub-Saharan Africa[55]. For example, maternal mortality after Caesarean section is fifty times higher in Africa compared with high income countries[56]. As such, patients consider invasive biomedical procedures high risk, and seek to avoid them through receipt of traditional therapies.

Additionally, we note that the content of peer testimonies strongly influences patients’ decisions to utilize traditional or biomedical care. Peer influences have been shown to

1  
2  
3 have strong impact on individual healthcare engagement in the cases of HIV services  
4 utilization[57-59], adolescent health[60,61], mental health[62], and substance  
5 misuse[63], for example. Our study shows how peer testimonies serve as endorsements  
6 of traditional healing, legitimizing its use through descriptions of clinical effectiveness. In  
7 contrast, largely negative narratives regarding biomedicine potentiate avoidance of these  
8 facilities and services.  
9

10 Our findings provide insight on how patients decide to engage with particular healthcare  
11 resources, and can guide efforts to improve healthcare quality and interventions in  
12 medically pluralistic communities. Importantly, our conceptual model can direct  
13 strategies to engage those who may avoid biomedical resources, and have low uptake  
14 of conventional healthcare outreach program, which are frequently facility-based, and/or  
15 delivered by biomedical providers. Our data suggest that healthcare users value the  
16 interpersonal interactions and trustworthiness of healers, but also may gain reassurance  
17 through receipt of biomedical testing and diagnostic technologies. An ideal health  
18 resource in a pluralistic context would potentially incorporate all of these valuable  
19 attributes. Traditional healers in Ghana have taken this approach, utilizing components  
20 of biomedical knowledge through reference to medical textbooks and “Google”[64].  
21 Similarly, we know of healers in Mbarara District who use glucometers, blood pressure  
22 cuffs, and performed commercially available rapid diagnostics tests for HIV and malaria.  
23 Our data suggest that decentralized healthcare services would be highly acceptable  
24 among pluralistic communities. An example of his approach at the national health policy  
25 level is demonstrated in the case of “differentiated care” for PLHIV[20], where service  
26 delivery is tailored to the needs of PLHIV in their communities, and biomedical facility  
27 visits are minimized.  
28  
29

30 Finally, our data contribute to a body of work that emphasizes the important role of  
31 traditional healers within the communities they serve. We hope our findings explain the  
32 persistent appeal of traditional medicine, and demonstrate that pluralistic behavior  
33 should be considered more than ‘an inconvenient truth’ for biomedical providers,  
34 researchers and policy makers. Low biomedical engagement in pluralistic settings  
35 should not simply be attributed to lack of access to formal resources, but should be  
36 considered an individual’s informed healthcare choice. We recommend that researchers  
37 and policy makers involve traditional healers when designing and implementing  
38 community-based health initiatives because healers are well positioned allies for  
39 healthcare programs. Community members may consider healers more trustworthy than  
40 biomedical providers[49]. Biomedicine could learn a great deal from healers regarding  
41 the power of interpersonal relationships as part of the healthcare process[13,14]. For  
42 example, Moshabela et. al. (2016) considered the roles of traditional healers in the  
43 context of a community-wide HIV testing and treatment intervention. They found that  
44 healers boosted impact and acceptability of the intervention through educating clients on  
45 HIV-related stigma and supporting linkage to HIV care[19].  
46  
47

48 Many studies have shown that healers are interested in working with biomedical  
49 providers to improve health outcomes for their patients[29,65,66]. However, the  
50 converse is not typically the case. Biomedical objections to traditional healing largely  
51 focus on use of alternatively explanatory mechanisms (such as belief that evil spirits or  
52 bad luck may cause physical symptoms), lack of standardized training and oversight of  
53 practices, and delivery of varying concentrations or mixtures of herbal therapies[15]. In  
54 fact, negative attitudes towards traditional medicine have been described as the primary  
55 barrier to true collaboration between traditional and biomedicine, as biomedical providers  
56  
57  
58  
59

1  
2  
3 repeatedly downplay the skills and contributions of traditional healers[16,17]. Biomedical  
4 providers may express distrust and disapproval of traditional medicine in interactions  
5 with their patients[16-18]. Related to this lack of trust is the observation that our  
6 participant groups reported markedly different experiences with pluralistic healthcare  
7 utilization. Most biomedical participants denied prior use of traditional medicine, while  
8 most traditional medicine users reported having previously sought biomedical care. This  
9 difference in self-reporting is likely an example of a well described phenomenon, where  
10 patients are reticent to disclose traditional medicine use in the context of receiving  
11 biomedical care[18,67,68]. Therefore, we suspect that participants seeking care in the  
12 biomedical context under-reported traditional medicine use due to fear of social  
13 judgement.  
14

15  
16 There are a few limitations of this study. We acknowledge that baseline characteristics of  
17 participants recruited from traditional healer practices are different than those recruited  
18 from an outpatient biomedical practice. Qualitative samples are intended to be relevant  
19 to the research question, and may not be representative, as would be prioritized in a  
20 quantitative study. We did not record medical histories for our participants, and cannot  
21 speak to how particular diagnoses may motivate to healthcare itinerary, beyond the  
22 symptoms prompting the current visit. This study includes only people seeking  
23 healthcare from traditional healers, and similar work is needed for those seeking care  
24 from faith healers. Further, we acknowledge the potential impact of social judgement and  
25 recognize that some biomedical participants may have been reticent to share positive  
26 feelings about traditional medicine during their interviews. Last, our qualitative data  
27 indicate multiple directions for future research. For example, what are strategies to  
28 facilitate bidirectional cooperation between traditional and biomedical systems? How  
29 would one design and implement a decentralized healthcare initiative in cooperation with  
30 traditional healers?  
31

## 32 **CONCLUSIONS**

33 Patients perceive clear advantages and disadvantages to biomedical and traditional care  
34 in medically pluralistic settings. We identified factors at the healthcare provider,  
35 healthcare system, and peer levels which can influence patients' therapeutic itineraries,  
36 and illustrate why traditional medicine is sometimes preferred. Our findings can inform  
37 community-based, public health interventions in medically pluralistic contexts, and  
38 underscore the importance of recognizing and engaging with traditional healers as  
39 important stakeholders in community health.  
40

## 41 **ACKNOWLEDGEMENTS**

42 The authors would like to acknowledge the work of our research assistants, Patricia  
43 Tushemereirwe, Donny Ndazima and Doreen Nabukalu. We are grateful to the  
44 traditional healers and patients in Mbarara District for sharing their experiences with us.  
45  
46

## 47 **CONTRIBUTORSHIP STATEMENT**

48 RS conceived of the study. RK and JMA provided input on study design, study  
49 procedures. RS and JMA oversaw data collection. RS was primarily responsible for data  
50 analysis, with input from JMA, RK and NW. RS composed the first draft of the  
51 manuscript. All authors provided input and approve of the final submission.  
52

## 53 **COMPETING INTERESTS**

54 The authors declare no competing interests.  
55  
56  
57  
58  
59  
60

## FUNDING

This study was supported by the National Institutes of Health (K23 MH111409), PI: Sundararajan. RK is supported by the National Institutes of Health (R01 MH109337). The study funder did not have any role in the study design, collection, analysis, interpretation of data, nor in the decision to submit the article for publication. All authors are independent from the funders, and had full access to all of the data. All authors take responsibility for the integrity of the data and accuracy of the data analysis.

## DATA SHARING STATEMENT

Deidentified data may be shared upon reasonable request by emailing the first author.

## PATIENT AND PUBLIC INVOLVEMENT STATEMENT

Patients were included as participants in this study. They did not directly participate in the design or implementation of the study, as the purpose of the study was to elicit patient perspectives on community healthcare resources. Results of this study were used to guide development of a study community advisory board, which includes patients and other stakeholders, including healthcare providers, traditional healers and community leaders.

## REFERENCES

- 1 Camlin CS, Ssemmondo E, Chamie G, *et al.* Men 'missing' from population-based HIV testing: insights from qualitative research. *AIDS Care* 2016;**28 Suppl 3**:67–73. doi:10.1080/09540121.2016.1164806
- 2 Boum Y, Atwine D, Orikiran P, *et al.* Male Gender is independently associated with pulmonary tuberculosis among sputum and non-sputum producers people with presumptive tuberculosis in Southwestern Uganda. *BMC Infect Dis* 2014;**14**:638. doi:10.1186/s12879-014-0638-5
- 3 Chikovore J, Gillespie N, McGrath N, *et al.* Men, masculinity, and engagement with treatment as prevention in KwaZulu-Natal, South Africa. *AIDS Care* 2016;**28 Suppl 3**:74–82. doi:10.1080/09540121.2016.1178953
- 4 Ware NC, Wyatt MA, Geng EH, *et al.* Toward an understanding of disengagement from HIV treatment and care in sub-Saharan Africa: a qualitative study. *PLoS Med* 2013;**10**:e1001369. doi:10.1371/journal.pmed.1001369
- 5 Mwamba C, Sharma A, Mukamba N, *et al.* 'They care rudely!': resourcing and relational health system factors that influence retention in care for people living with HIV in Zambia. *BMJ Glob Health* 2018;**3**:e001007. doi:10.1136/bmjgh-2018-001007
- 6 Layer EH, Brahmabhatt H, Beckham SW, *et al.* 'I pray that they accept me without scolding:' experiences with disengagement and re-engagement in HIV care and treatment services in Tanzania. *AIDS Patient Care STDS* 2014;**28**:483–8. doi:10.1089/apc.2014.0077
- 7 Quinn K, Dickson-Gomez J, Zarwell M, *et al.* 'A Gay Man and a Doctor are Just like, a Recipe for Destruction': How Racism and Homonegativity in Healthcare Settings

- 1  
2  
3 Influence PrEP Uptake Among Young Black MSM. *AIDS Behav* 2019;**23**:1951–63.  
4 doi:10.1007/s10461-018-2375-z  
5
- 6 8 Bradley S, McCourt C, Rayment J, *et al*. Disrespectful intrapartum care during  
7 facility-based delivery in sub-Saharan Africa: A qualitative systematic review and  
8 thematic synthesis of women's perceptions and experiences. *Soc Sci Med*  
9 2016;**169**:157–70. doi:10.1016/j.socscimed.2016.09.039  
10
- 11 9 Asefa A, Bekele D, Morgan A, *et al*. Service providers' experiences of disrespectful  
12 and abusive behavior towards women during facility based childbirth in Addis  
13 Ababa, Ethiopia. *Reprod Health* 2018;**15**:4. doi:10.1186/s12978-017-0449-4  
14
- 15 10 Sipsma H, Thompson J, Maurer L, *et al*. Preferences for home delivery in Ethiopia:  
16 provider perspectives. *Glob Public Health* 2013;**8**:1014–26.  
17 doi:10.1080/17441692.2013.835434  
18
- 19 11 Abdullahi AA. Trends and challenges of traditional medicine in Africa. *Afr J Tradit*  
20 *Complement Altern Med* 2011;**8**:115–23. doi:10.4314/ajtcam.v8i5S.5  
21
- 22 12 Busia K. Medical provision in Africa -- past and present. *Phytother Res*  
23 2005;**19**:919–23. doi:10.1002/ptr.1775  
24
- 25 13 Blasini M, Peiris N, Wright T, *et al*. The Role of Patient-Practitioner Relationships in  
26 Placebo and Nocebo Phenomena. *Int Rev Neurobiol* 2018;**139**:211–31.  
27 doi:10.1016/bs.irm.2018.07.033  
28
- 29 14 Kleinman A, Sung L. Why Do Indigenous Practitioners Successfully Heal?  
30 1979;**138**:7–26. doi:10.1016/-01607987(79)90014-0  
31
- 32 15 King R. Collaboration with traditional healers in HIV/AIDS prevention and care in  
33 sub-Saharan Africa. UNAIDS. Available at [www.data.unaids.org/publications/irc-](http://www.data.unaids.org/publications/irc-pubj-c-tradhealen.pdf)  
34 [pubj-c-tradhealen.pdf](http://www.data.unaids.org/publications/irc-pubj-c-tradhealen.pdf). 2000. Accessed 1 October 2019.  
35
- 36 16 Audet CM, Salato J, Blevins M, *et al*. Educational intervention increased referrals to  
37 allopathic care by traditional healers in three high HIV-prevalence rural districts in  
38 Mozambique. *PLoS ONE* 2013;**8**:e70326–8. doi:10.1371/journal.pone.0070326  
39
- 40 17 Gall A, Anderson K, Adams J, *et al*. An exploration of healthcare providers'  
41 experiences and perspectives of Traditional and complementary medicine usage  
42 and disclosure by Indigenous cancer patients. *BMC Complement Altern Med*  
43 2019;**19**:259–9. doi:10.1186/s12906-019-2665-7  
44
- 45 18 Puoane TR, Hughes GD, Uwimana J, *et al*. Why HIV positive patients on  
46 antiretroviral treatment and/or cotrimoxazole prophylaxis use traditional medicine:  
47 perceptions of health workers, traditional healers and patients: a study in two  
48 provinces of South Africa. *Afr J Tradit Complement Altern Med* 2012;**9**:495–502.  
49 doi:10.4314/ajtcam.v9i4.6  
50
- 51 19 Moshabela M, Zuma T, Orne-Gliemann J, *et al*. 'It is better to die': experiences of  
52 traditional health practitioners within the HIV treatment as prevention trial  
53  
54  
55  
56  
57  
58  
59

- 1  
2  
3 communities in rural South Africa (ANRS 12249 TasP trial). *AIDS Care* 2016;**28**  
4 **Suppl 3**:24–32. doi:10.1080/09540121.2016.1181296  
5
- 6 20 Long L, Kuchukhidze S, Pascoe S, *et al*. Differentiated models of service delivery  
7 for antiretroviral treatment of HIV in sub-Saharan Africa: a rapid review protocol.  
8 *Syst Rev* 2019;**8**:314–6. doi:10.1186/s13643-019-1210-6  
9
- 10 21 Moshabela M, Pronyk P, Williams N, *et al*. Patterns and implications of medical  
11 pluralism among HIV/AIDS patients in rural South Africa. *AIDS Behav*  
12 2011;**15**:842–52. doi:10.1007/s10461-010-9747-3  
13
- 14 22 Moshabela M, Bukenya D, Darong G, *et al*. Traditional healers, faith healers and  
15 medical practitioners: the contribution of medical pluralism to bottlenecks along the  
16 cascade of care for HIV/AIDS in Eastern and Southern Africa. *Sex Transm Infect*  
17 2017;**93**:e052974. doi:10.1136/sextrans-2016-052974  
18
- 19 23 Audet CM, Blevins M, Rosenberg C, *et al*. Symptomatic HIV-Positive Persons in  
20 Rural Mozambique Who First Consult a Traditional Healer Have Delays in HIV  
21 Testing : A Cross-Sectional Study. *Journal of Acquired Immune Deficiency*  
22 *Syndrome* 2014;**66**:80–6.  
23
- 24 24 Pantelic M, Cluver L, Boyes M, *et al*. Medical Pluralism Predicts Non-ART Use  
25 among Parents in Need of ART: A Community Survey in KwaZulu-Natal, South  
26 Africa. *AIDS Behav* 2014;**19**:137–44. doi:10.1007/s10461-014-0852-6  
27
- 28 25 Manguvo A, Mafuvadze B. The impact of traditional and religious practices on the  
29 spread of Ebola in West Africa: time for a strategic shift. *Pan Afr Med J* 2015;**22**  
30 **Suppl 1**:9. doi:10.11694/pamj.suppl.2015.22.1.6190  
31
- 32 26 Iskandarsyah A, de Klerk C, Suardi DR, *et al*. Consulting a traditional healer and  
33 negative illness perceptions are associated with non-adherence to treatment in  
34 Indonesian women with breast cancer. *Psychooncology* 2014;**23**:1118–24.  
35 doi:10.1002/pon.3534  
36
- 37 27 Broom A, Wijewardena K, Sibbritt D, *et al*. The use of traditional, complementary  
38 and alternative medicine in Sri Lankan cancer care: results from a survey of 500  
39 cancer patients. *Public Health* 2010;**124**:232–7. doi:10.1016/j.puhe.2010.02.012  
40
- 41 28 Liwa A, Roediger R, Jaka H, *et al*. Herbal and Alternative Medicine Use in  
42 Tanzanian Adults Admitted with Hypertension-Related Diseases: A Mixed-Methods  
43 Study. *Int J Hypertens* 2017;**2017**:5692572–9. doi:10.1155/2017/5692572  
44
- 45 29 King R, Homsy J. Involving traditional healers in AIDS education and counselling in  
46 sub-Saharan Africa: a review. *AIDS* 1997;**11 Suppl A**:S217–25.  
47
- 48 30 Homsy J, King R. The role of traditional healers in HIV / AIDS counselling in  
49 Kampala, Uganda. Key issues and debates: traditional healers. *Soc Afr SIDA*  
50 1996;:2–3. PMID: 12179372  
51  
52  
53  
54  
55  
56  
57  
58  
59  
60

- 1  
2  
3 31 Peltzer K, Mngqundaniso N, Petros G. A controlled study of an HIV/AIDS/STI/TB  
4 intervention with traditional healers in KwaZulu-Natal, South Africa. *AIDS Behav*  
5 2006;**10**:683–90. doi:10.1007/s10461-006-9110-x  
6  
7 32 Makundi EA, Malebo HM, Mhame P, *et al.* Role of traditional healers in the  
8 management of severe malaria among children below five years of age: the case of  
9 Kilosa and Handeni Districts, Tanzania. *Malar J* 2006;**5**:58. doi:10.1186/1475-2875-  
10 5-58  
11  
12 33 Audet CM, Hamilton E, Hughart L, *et al.* Engagement of Traditional Healers and  
13 Birth Attendants as a Controversial Proposal to Extend the HIV Health Workforce.  
14 *Curr HIV/AIDS Rep* 2015;**12**:238–45. doi:10.1007/s11904-015-0258-8  
15  
16 34 Horwitz RH, Tsai AC, Maling S, *et al.* No Association Found Between Traditional  
17 Healer Use and Delayed Antiretroviral Initiation in Rural Uganda. *AIDS Behav*  
18 2012;**17**:260–5. doi:10.1007/s10461-011-0132-7  
19  
20 35 Sundararajan R, Mwanga-Amumpaire J, Adrama H, *et al.* Sociocultural and  
21 Structural Factors Contributing to Delays in Treatment for Children with Severe  
22 Malaria: A Qualitative Study in Southwestern Uganda. *American Journal of Tropical*  
23 *Medicine and Hygiene* 2015;**92**:933–40. doi:10.4269/ajtmh.14-0784  
24  
25 36 Kyomuhendo GB. Low use of rural maternity services in Uganda: impact of  
26 women's status, traditional beliefs and limited resources. *Reproductive Health*  
27 *Matters* 2003;**11**:16–26. doi:10.1016/S0968-8080(03)02176-1  
28  
29 37 van Duijl M, Kleijn W, de Jong J. Unravelling the spirits' message: a study of help-  
30 seeking steps and explanatory models among patients suffering from spirit  
31 possession in Uganda. *Int J Ment Health Syst* 2014;**8**:24. doi:10.1186/1752-4458-8-  
32 24  
33  
34 38 Berger I, Buchanan C. The Cwezi cults and the history of western Uganda. In:  
35 Gallagher JT, ed. *East African Culture History*. Syracuse: Maxwell School of  
36 Citizenship and Public Affairs. 1976.  
37  
38 39 Palinkas LA, Horwitz SM, Green CA, *et al.* Purposeful Sampling for Qualitative Data  
39 Collection and Analysis in Mixed Method Implementation Research. *Adm Policy*  
40 *Ment Health* 2015;**42**:533–44. doi:10.1007/s10488-013-0528-y  
41  
42 40 Creswell JW. *Qualitative Inquiry & Research Design*. Sage Publications. 2017.  
43  
44 41 Patton MQ. *Qualitative Evaluation and Research Methods*. Sage Publications.  
45 1990.  
46  
47 42 Morse JM. Determining sample size. *Qualitative Health Research*. 2000;**10**:3-5.  
48  
49 43 Smith JA, Flowers P, Larkin M. *Interpretive Phenomenological Analysis*. Sage  
50 Publications. 2009.  
51  
52 44 Smith J, Osborn M. Interpretive phenomenological analysis. In: Smith JA, ed.  
53 *Qualitative Psychology*. 2015, 53–80.  
54  
55  
56  
57  
58  
59  
60

- 1  
2  
3 45 Glaser BG, Strauss A. *The Discovery of Grounded Theory: Strategies for Qualitative Research*. Chicago: Aldine. 1967.
- 4  
5  
6 46 Littlewood RA, Vanable PA. A Global Perspective on Complementary and  
7 Alternative Medicine Use Among People Living with HIV/AIDS in the Era of  
8 Antiretroviral Treatment. *Curr HIV/AIDS Rep* 2011;**8**:257–68. doi:10.1007/s11904-  
9 011-0090-8
- 10  
11 47 Finkler K. Sacred Healing and Biomedicine Compared. *Medical Anthropology*  
12 *Quarterly* 1994;**8**:178–97. doi:10.1525/maq.1994.8.2.02a00030
- 13  
14 48 Sundararajan R, Kalkonde Y, Gokhale C, *et al*. Barriers to malaria control among  
15 marginalized tribal communities: a qualitative study. *PLoS ONE* 2013;**8**:e81966.  
16 doi:10.1371/journal.pone.0081966
- 17  
18 49 Hampshire K, Hamill H, Mariwah S, *et al*. The application of Signalling Theory to  
19 health-related trust problems: The example of herbal clinics in Ghana and  
20 Tanzania. *Soc Sci Med* 2017;**188**:109–18. doi:10.1016/j.socscimed.2017.07.009
- 21  
22 50 Rolfe A, Burton C. Reassurance after diagnostic testing with a low pretest  
23 probability of serious disease: systematic review and meta-analysis. *JAMA Intern*  
24 *Med* 2013;**173**:407–16. doi:10.1001/jamainternmed.2013.2762
- 25  
26 51 van Ravesteijn H, van Dijk I, Darmon D, *et al*. The reassuring value of diagnostic  
27 tests: a systematic review. *Patient Educ Couns* 2012;**86**:3–8.  
28 doi:10.1016/j.pec.2011.02.003
- 29  
30 52 Geleto A, Chojenta C, Mussa A, *et al*. Barriers to access and utilization of  
31 emergency obstetric care at health facilities in sub-Saharan Africa-a systematic  
32 review protocol. *Syst Rev* 2018;**7**:60. doi:10.1186/s13643-018-0720-y
- 33  
34 53 Kisitu DK, Eyler LE, Kajja I, *et al*. A pilot orthopedic trauma registry in Ugandan  
35 district hospitals. *J Surg Res* 2016;**202**:481–8. doi:10.1016/j.jss.2015.12.028
- 36  
37 54 Onyemaechi NO, Lasebikan OA, Elachi IC, *et al*. Patronage of traditional  
38 bonesetters in Makurdi, north-central Nigeria. *Patient Prefer Adherence*  
39 2015;**9**:275–9. doi:10.2147/PPA.S76877
- 40  
41 55 Uribe-Leitz T, Jaramillo J, Maurer L, *et al*. Variability in mortality following  
42 caesarean delivery, appendectomy, and groin hernia repair in low-income and  
43 middle-income countries: a systematic review and analysis of published data.  
44 *Lancet Glob Health* 2016;**4**:e165–74. doi:10.1016/S2214-109X(15)00320-4
- 45  
46 56 Bishop D, Dyer RA, Maswime S, *et al*. Maternal and neonatal outcomes after  
47 caesarean delivery in the African Surgical Outcomes Study: a 7-day prospective  
48 observational cohort study. *Lancet Glob Health* 2019;**7**:e513–22.  
49 doi:10.1016/S2214-109X(19)30036-1
- 50  
51 57 Chang LW, Kagaayi J, Nakigozi G, *et al*. Effect of peer health workers on AIDS care  
52 in Rakai, Uganda: a cluster-randomized trial. *PLoS ONE* 2010;**5**:e10923.  
53 doi:10.1371/journal.pone.0010923
- 54  
55  
56  
57  
58  
59



- 1  
2  
3 58 Simoni JM, Nelson KM, Franks JC, *et al.* Are peer interventions for HIV efficacious? A systematic review. *AIDS Behav* 2011;**15**:1589–95. doi:10.1007/s10461-011-9963-5
- 4  
5  
6  
7 59 Semitala FC, Camlin CS, Wallenta J, *et al.* Understanding uptake of an intervention to accelerate antiretroviral therapy initiation in Uganda via qualitative inquiry. *J Int AIDS Soc* 2017;**20**:e25033. doi:10.1002/jia2.25033
- 8  
9  
10  
11 60 Kågesten A, Gibbs S, Blum RW, *et al.* Understanding Factors that Shape Gender Attitudes in Early Adolescence Globally: A Mixed-Methods Systematic Review. *PLoS ONE* 2016;**11**:e0157805. doi:10.1371/journal.pone.0157805
- 12  
13  
14  
15 61 Rock A, Barrington C, Abdoulayi S, *et al.* Social networks, social participation, and health among youth living in extreme poverty in rural Malawi. *Soc Sci Med* 2016;**170**:55–62. doi:10.1016/j.socscimed.2016.10.005
- 16  
17  
18  
19 62 Coatsworth-Puspoky R, Forchuk C, Ward-Griffin C. Peer support relationships: an unexplored interpersonal process in mental health. *J Psychiatr Ment Health Nurs* 2006;**13**:490–7. doi:10.1111/j.1365-2850.2006.00970.x
- 20  
21  
22  
23 63 Alberta AJ, Ploski RR, Carlson SL. Addressing challenges to providing peer-based recovery support. *J Behav Health Serv Res* 2012;**39**:481–91. doi:10.1007/s11414-012-9286-y
- 24  
25  
26  
27 64 Hampshire KR, Owusu SA. Grandfathers, Google, and dreams: medical pluralism, globalization, and new healing encounters in Ghana. *Med Anthropol* 2013;**32**:247–65. doi:10.1080/01459740.2012.692740
- 28  
29  
30  
31 65 Kayombo EJ, Uiso FC, Mbwambo ZH, *et al.* Experience of initiating collaboration of traditional healers in managing HIV and AIDS in Tanzania. *J Ethnobiol Ethnomed* 2007;**3**:6. doi:10.1186/1746-4269-3-6
- 32  
33  
34  
35 66 Green EC. The participation of African traditional healers in AIDS/STD prevention programmes. *Trop Doct* 1997;**27 Suppl 1**:56–9. doi:10.1177/00494755970270S117
- 36  
37  
38  
39 67 James PB, Wardle J, Steel A, *et al.* Traditional, complementary and alternative medicine use in Sub-Saharan Africa: a systematic review. *BMJ Glob Health* 2018;**3**:e000895. doi:10.1136/bmjgh-2018-000895
- 40  
41  
42  
43 68 Kelak JA, Cheah WL, Safii R. Patient's Decision to Disclose the Use of Traditional and Complementary Medicine to Medical Doctor: A Descriptive Phenomenology Study. *Evid Based Complement Alternat Med* 2018;**2018**:4735234–11. doi:10.1155/2018/4735234
- 44  
45  
46  
47  
48  
49

## FIGURE CAPTION

50  
51 Figure 1. Conceptual model showing key factors within various levels (healthcare provider, healthcare system, peer) influencing individual health behavior within medically pluralistic contexts. Each factor differentially influences an individual's therapeutic itinerary. Negative factors may motivate a switch to the other modality, and positive factors contribute towards continued use of a particular healthcare modality. This model

52  
53  
54  
55  
56  
57  
58  
59  
60

1  
2  
3  
4  
5  
6  
7  
8  
9  
10  
11  
12  
13  
14  
15  
16  
17  
18  
19  
20  
21  
22  
23  
24  
25  
26  
27  
28  
29  
30  
31  
32  
33  
34  
35  
36  
37  
38  
39  
40  
41  
42  
43  
44  
45  
46  
47  
48  
49  
50  
51  
52  
53  
54  
55  
56  
57  
58  
59  
60

is not inclusive of all variables that influence health engagement, but illustrates categories that were described by our participants in driving their healthcare decision making, specifically regarding decisions to utilize traditional or biomedical care.

For peer review only

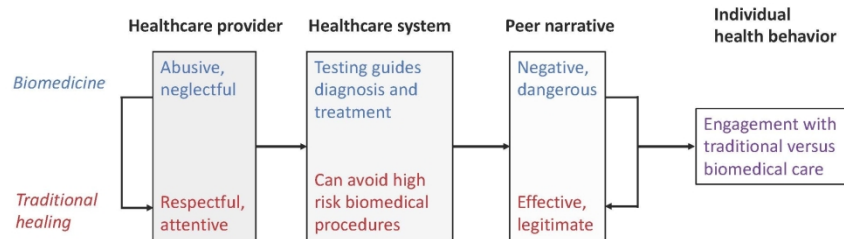

Figure 1. Conceptual model showing key factors within various levels (healthcare provider, healthcare system, peer) influencing individual health behavior within medically pluralistic contexts. Each factor differentially influences an individual's therapeutic itinerary. Negative factors may motivate a switch to the other modality, and positive factors contribute towards continued use of a particular healthcare modality. This model is not inclusive of all variables that influence health engagement, but illustrates categories that were described by our participants in driving their healthcare decision making, specifically regarding decisions to utilize traditional or biomedical care.

338x190mm (200 x 200 DPI)

## Standards for Reporting Qualitative Research (SRQR)\*

<http://www.equator-network.org/reporting-guidelines/srqr/>

Page/line no(s).

### Title and abstract

|                                                                                                                                                                                                                                                              |   |
|--------------------------------------------------------------------------------------------------------------------------------------------------------------------------------------------------------------------------------------------------------------|---|
| <p><b>Title</b> - Concise description of the nature and topic of the study Identifying the study as qualitative or indicating the approach (e.g., ethnography, grounded theory) or data collection methods (e.g., interview, focus group) is recommended</p> | 1 |
| <p><b>Abstract</b> - Summary of key elements of the study using the abstract format of the intended publication; typically includes background, purpose, methods, results, and conclusions</p>                                                               | 2 |

### Introduction

|                                                                                                                                                                     |     |
|---------------------------------------------------------------------------------------------------------------------------------------------------------------------|-----|
| <p><b>Problem formulation</b> - Description and significance of the problem/phenomenon studied; review of relevant theory and empirical work; problem statement</p> | 3-4 |
| <p><b>Purpose or research question</b> - Purpose of the study and specific objectives or questions</p>                                                              | 4   |

### Methods

|                                                                                                                                                                                                                                                                                                                                                                                                             |     |
|-------------------------------------------------------------------------------------------------------------------------------------------------------------------------------------------------------------------------------------------------------------------------------------------------------------------------------------------------------------------------------------------------------------|-----|
| <p><b>Qualitative approach and research paradigm</b> - Qualitative approach (e.g., ethnography, grounded theory, case study, phenomenology, narrative research) and guiding theory if appropriate; identifying the research paradigm (e.g., postpositivist, constructivist/ interpretivist) is also recommended; rationale**</p>                                                                            | 6   |
| <p><b>Researcher characteristics and reflexivity</b> - Researchers' characteristics that may influence the research, including personal attributes, qualifications/experience, relationship with participants, assumptions, and/or presuppositions; potential or actual interaction between researchers' characteristics and the research questions, approach, methods, results, and/or transferability</p> | 6   |
| <p><b>Context</b> - Setting/site and salient contextual factors; rationale**</p>                                                                                                                                                                                                                                                                                                                            | 4-5 |
| <p><b>Sampling strategy</b> - How and why research participants, documents, or events were selected; criteria for deciding when no further sampling was necessary (e.g., sampling saturation); rationale**</p>                                                                                                                                                                                              | 4-6 |
| <p><b>Ethical issues pertaining to human subjects</b> - Documentation of approval by an appropriate ethics review board and participant consent, or explanation for lack thereof; other confidentiality and data security issues</p>                                                                                                                                                                        | 7   |
| <p><b>Data collection methods</b> - Types of data collected; details of data collection procedures including (as appropriate) start and stop dates of data collection and analysis, iterative process, triangulation of sources/methods, and modification of procedures in response to evolving study findings; rationale**</p>                                                                             | 6   |

|                       |                                                                                                                                                                                                                                                       |     |
|-----------------------|-------------------------------------------------------------------------------------------------------------------------------------------------------------------------------------------------------------------------------------------------------|-----|
| 1<br>2<br>3<br>4<br>5 | <b>Data collection instruments and technologies</b> - Description of instruments (e.g., interview guides, questionnaires) and devices (e.g., audio recorders) used for data collection; if/how the instrument(s) changed over the course of the study | 5-6 |
| 6<br>7<br>8           | <b>Units of study</b> - Number and relevant characteristics of participants, documents, or events included in the study; level of participation (could be reported in results)                                                                        | 7   |
| 9<br>10<br>11<br>12   | <b>Data processing</b> - Methods for processing data prior to and during analysis, including transcription, data entry, data management and security, verification of data integrity, data coding, and anonymization/de-identification of excerpts    | 6-7 |
| 13<br>14<br>15<br>16  | <b>Data analysis</b> - Process by which inferences, themes, etc., were identified and developed, including the researchers involved in data analysis; usually references a specific paradigm or approach; rationale**                                 | 6-7 |
| 17<br>18<br>19<br>20  | <b>Techniques to enhance trustworthiness</b> - Techniques to enhance trustworthiness and credibility of data analysis (e.g., member checking, audit trail, triangulation); rationale**                                                                | 6   |

### Results/findings

|                      |                                                                                                                                                                                                   |      |
|----------------------|---------------------------------------------------------------------------------------------------------------------------------------------------------------------------------------------------|------|
| 23<br>24<br>25<br>26 | <b>Synthesis and interpretation</b> - Main findings (e.g., interpretations, inferences, and themes); might include development of a theory or model, or integration with prior research or theory | 8-12 |
| 27<br>28<br>29       | <b>Links to empirical data</b> - Evidence (e.g., quotes, field notes, text excerpts, photographs) to substantiate analytic findings                                                               | 8-12 |

### Discussion

|                                  |                                                                                                                                                                                                                                                                                                                                                                                                             |       |
|----------------------------------|-------------------------------------------------------------------------------------------------------------------------------------------------------------------------------------------------------------------------------------------------------------------------------------------------------------------------------------------------------------------------------------------------------------|-------|
| 32<br>33<br>34<br>35<br>36<br>37 | <b>Integration with prior work, implications, transferability, and contribution(s) to the field</b> - Short summary of main findings; explanation of how findings and conclusions connect to, support, elaborate on, or challenge conclusions of earlier scholarship; discussion of scope of application/generalizability; identification of unique contribution(s) to scholarship in a discipline or field | 12-15 |
| 38<br>39                         | <b>Limitations</b> - Trustworthiness and limitations of findings                                                                                                                                                                                                                                                                                                                                            | 15    |

### Other

|                |                                                                                                                                               |    |
|----------------|-----------------------------------------------------------------------------------------------------------------------------------------------|----|
| 42<br>43<br>44 | <b>Conflicts of interest</b> - Potential sources of influence or perceived influence on study conduct and conclusions; how these were managed | 16 |
| 45<br>46       | <b>Funding</b> - Sources of funding and other support; role of funders in data collection, interpretation, and reporting                      | 16 |

\*The authors created the SRQR by searching the literature to identify guidelines, reporting standards, and critical appraisal criteria for qualitative research; reviewing the reference lists of retrieved sources; and contacting experts to gain feedback. The SRQR aims to improve the transparency of all aspects of qualitative research by providing clear standards for reporting qualitative research.

1  
2  
3  
4  
5  
6  
7  
8  
9  
10  
11  
12  
13  
14  
15  
16  
17  
18  
19  
20  
21  
22  
23  
24  
25  
26  
27  
28  
29  
30  
31  
32  
33  
34  
35  
36  
37  
38  
39  
40  
41  
42  
43  
44  
45  
46  
47  
48  
49  
50  
51  
52  
53  
54  
55  
56  
57  
58  
59  
60

\*\*The rationale should briefly discuss the justification for choosing that theory, approach, method, or technique rather than other options available, the assumptions and limitations implicit in those choices, and how those choices influence study conclusions and transferability. As appropriate, the rationale for several items might be discussed together.

**Reference:**

O'Brien BC, Harris IB, Beckman TJ, Reed DA, Cook DA. **Standards for reporting qualitative research: a synthesis of recommendations.** *Academic Medicine*, Vol. 89, No. 9 / Sept 2014  
DOI: 10.1097/ACM.0000000000000388

For peer review only

# BMJ Open

## A conceptual model for pluralistic healthcare behavior: results from a qualitative study in southwestern Uganda

|                                 |                                                                                                                                                                                                                                                                                                                                                    |
|---------------------------------|----------------------------------------------------------------------------------------------------------------------------------------------------------------------------------------------------------------------------------------------------------------------------------------------------------------------------------------------------|
| Journal:                        | <i>BMJ Open</i>                                                                                                                                                                                                                                                                                                                                    |
| Manuscript ID                   | bmjopen-2019-033410.R3                                                                                                                                                                                                                                                                                                                             |
| Article Type:                   | Research                                                                                                                                                                                                                                                                                                                                           |
| Date Submitted by the Author:   | 23-Mar-2020                                                                                                                                                                                                                                                                                                                                        |
| Complete List of Authors:       | Sundararajan, Radhika; Weill Cornell Medical College, Center for Global Health; Weill Cornell Medical College, Emergency Medicine<br>Mwanga-Amumpaire, Juliet; Mbarara University of Science and Technology<br>King, Rachel; UCSF Medical Center, Global Health Sciences<br>Ware, Norma; Harvard Medical School, Global Health and Social Medicine |
| <b>Primary Subject Heading</b>: | Global health                                                                                                                                                                                                                                                                                                                                      |
| Secondary Subject Heading:      | Complementary medicine                                                                                                                                                                                                                                                                                                                             |
| Keywords:                       | COMPLEMENTARY MEDICINE, International health services < HEALTH SERVICES ADMINISTRATION & MANAGEMENT, QUALITATIVE RESEARCH, PUBLIC HEALTH                                                                                                                                                                                                           |
|                                 |                                                                                                                                                                                                                                                                                                                                                    |

SCHOLARONE™  
Manuscripts



I, the Submitting Author has the right to grant and does grant on behalf of all authors of the Work (as defined in the below author licence), an exclusive licence and/or a non-exclusive licence for contributions from authors who are: i) UK Crown employees; ii) where BMJ has agreed a CC-BY licence shall apply, and/or iii) in accordance with the terms applicable for US Federal Government officers or employees acting as part of their official duties; on a worldwide, perpetual, irrevocable, royalty-free basis to BMJ Publishing Group Ltd ("BMJ") its licensees and where the relevant Journal is co-owned by BMJ to the co-owners of the Journal, to publish the Work in this journal and any other BMJ products and to exploit all rights, as set out in our [licence](#).

The Submitting Author accepts and understands that any supply made under these terms is made by BMJ to the Submitting Author unless you are acting as an employee on behalf of your employer or a postgraduate student of an affiliated institution which is paying any applicable article publishing charge ("APC") for Open Access articles. Where the Submitting Author wishes to make the Work available on an Open Access basis (and intends to pay the relevant APC), the terms of reuse of such Open Access shall be governed by a Creative Commons licence – details of these licences and which [Creative Commons](#) licence will apply to this Work are set out in our licence referred to above.

Other than as permitted in any relevant BMJ Author's Self Archiving Policies, I confirm this Work has not been accepted for publication elsewhere, is not being considered for publication elsewhere and does not duplicate material already published. I confirm all authors consent to publication of this Work and authorise the granting of this licence.



1  
2  
3 **A conceptual model for pluralistic healthcare behavior: results from a qualitative**  
4 **study in southwestern Uganda**  
5

6 Radhika Sundararajan MD, PhD<sup>1,2\*</sup>  
7 Juliet Mwanga-Amumpaire, MD, MS<sup>3</sup>  
8 Rachel King, PhD, MPH<sup>4</sup>  
9 Norma C. Ware, PhD<sup>5,6</sup>  
10

11 1. Department of Emergency Medicine, Weill Cornell Medicine, 525 East 68<sup>th</sup> Street,  
12 New York, 10065, USA, ras9199@med.cornell.edu; 212-746-0780

13 2. Weill Cornell Center for Global Health, New York, USA

14 3. Mbarara University of Science and Technology, Mbarara, Uganda

15 4. Global Health Sciences, University of California San Francisco, USA

16 5. Department of Medicine, Brigham and Women's Hospital, Boston, USA

17 6. Department of Global Health and Social Medicine, Harvard Medical School, Boston  
18 USA

19 \*corresponding author  
20  
21  
22  
23  
24  
25  
26  
27  
28  
29  
30  
31  
32  
33  
34  
35  
36  
37  
38  
39  
40  
41  
42  
43  
44  
45  
46  
47  
48  
49  
50  
51  
52  
53  
54  
55  
56  
57  
58  
59  
60

## ABSTRACT

**Introduction:** *Medical pluralism*, or concurrent utilization of multiple therapeutic modalities, is common in various international contexts, and has been characterized as a factor contributing to poor health outcomes in low-resource settings. Traditional healers are ubiquitous providers in most regions, including the study site of southwestern Uganda. Where both informal and formal healthcare services are both available, patients do not engage with both options equally. It is not well understood why patients choose to engage with one healthcare modality over the other. The goal of this study was to explain therapeutic itineraries and create a conceptual framework of pluralistic health behavior.

**Methods:** In-depth interviews were conducted from September 2017 – February 2018 with patients seeking care at traditional healers (N=30) and at an outpatient medicine clinic (N=30) in Mbarara, Uganda; the study is nested within a longitudinal project examining HIV testing engagement among traditional healer-utilizing communities. Inclusion criteria included age  $\geq 18$  years, and ability to provide informed consent. Participants were recruited from practices representing the range of healer specialties. Following an inductive approach, interview transcripts were reviewed and coded to identify conceptual categories explaining healthcare utilization.

**Results:** We identified three broad categories relevant to healthcare utilization: 1) traditional healers treat patients with “care”; 2) biomedicine uses “modern” technologies; and 3) peer “testimony” influences healthcare engagement. These categories describe variables at the healthcare provider, healthcare system, and peer levels that interrelate to motivate individual engagement in pluralistic health resources.

**Conclusions:** Patients perceive clear advantages and disadvantages to biomedical and traditional care in medically pluralistic settings. We identified factors at the healthcare provider, healthcare system, and peer levels which influence patients’ therapeutic itineraries. Our findings provide a basis to improve health outcomes in medically pluralistic settings, and underscore the importance of recognizing traditional healers as important stakeholders in community health.

**Keywords:** Medical pluralism, Uganda, traditional healers, qualitative

## STRENGTHS AND LIMITATIONS OF THIS STUDY

- This study illuminates factors that motivate engagement with healthcare resources by using data from biomedical and traditional medicine utilizers
- This study employed qualitative methods to explore participants' own experiences of healthcare modalities, and identify perceived advantages and disadvantages of each form of healing
- While the data gathered is highly contextual and specific to the study context, the conceptual model presented offers a broad application to other medically pluralistic communities
- This conceptual model could be used to guide healthcare initiatives, policies, and research in pluralistic settings

## INTRODUCTION

*Medical pluralism*, or utilization of multiple therapeutic modalities, is common where both biomedical and complementary or alternative treatments are available to patients. This pattern of healthcare engagement is observed in both high-[1,2] and low-resource settings[3-6], and is well described for patients with both acute[7-9] and chronic illness[10-13] in various international contexts. In low- and middle-income countries, complementary and alternative healthcare services are often provided by traditional healers, who practice outside of the formal biomedical system. Traditional healers are broadly defined by the World Health Organization as: 1) persons recognized by local community as healers; 2) having regular patient attendance; and 3) having space to receive and treat patients[14]. They "provide health care by using plant, animal and mineral substances, and other methods based on social, cultural, and religious practices" [14]. It is estimated that 80% of the population in sub-Saharan Africa visit traditional healers[5].

As such, traditional healers are an initial point of contact for patients in medically pluralistic settings. Patients may prefer informal health services from traditional healers because of their increased accessibility: healers are present in higher numbers than physicians and biomedical facilities, particularly in low-resource settings[5]. However, their popularity cannot be strictly explained by convenience. Research in urban regions having high density of biomedical institutions demonstrates similar reliance on traditional healers[1,3]. Patients may also seek out traditional therapies to address symptoms attributed to ancestral curses or bewitching, believed incurable by biomedicine[15]. Use of traditional medicine is also strongly tied to local religious and ethnic identities[16]. Patients may pursue traditional healing in the setting of biomedicine treatment "failure", when symptoms worsen or persist despite ongoing therapies[6,17,18].

Prior research has shown that traditional healer use is a factor contributing to poor health outcomes among patients. For example, receiving care from a traditional healer has been shown to delay HIV testing and antiretroviral therapy (ART) initiation[19], and interrupt HIV treatment[18] for people living with HIV (PLHIV). In Mozambique, PLHIV initially seeking care from traditional healers experienced significantly longer delays to diagnosis compared with those who did not utilize healers; this delay exponentially grew with corresponding increases in the number of healers consulted prior to receiving HIV testing[19]. In South Africa, medical pluralism was shown to be negatively associated with ART use in a cohort of PLHIV[20]. Use of traditional healers was also identified as an important variable contributing to the recent Ebola outbreak in West Africa[21]. Studies have demonstrated that medical pluralism similarly contributes to poor outcomes

1  
2  
3 for non-infectious diseases, such as nonadherence to chemotherapy for cancer[4,22], or  
4 poor outpatient linkage to care for patients with hypertension[12].  
5

6 Because they are frequently consulted for most types of illness, traditional healers could  
7 be important allies for public health initiatives. Some programs have attempted to  
8 engage with healers for these purposes, which have included trainings for healers to  
9 deliver counseling and facility referral for HIV[23,24], TB[25], or malaria testing[7], or to  
10 increase uptake of prenatal care[26] and mental health treatment[27]. However, in most  
11 cases, program effectiveness has been limited by the fact that patients may not  
12 complete referrals to facilities. These findings highly the fact that where both informal  
13 and formal healthcare services are available, patients do not engage with both options  
14 equally.  
15

16  
17 There remains a critical lack of understanding about why patients choose to utilize one  
18 healthcare resource, but not another. It is clear that biomedicine and traditional healing  
19 offer distinctive forms of healthcare for patients. But there is a dearth of knowledge on  
20 perceived advantages and disadvantages of each modality from the perspective of the  
21 healthcare user. Without this information, healthcare initiatives in pluralistic settings  
22 cannot be truly “patient-centered”, and are at risk for failure. The goal of this study was  
23 to identify factors that motivate engagement with healthcare resources in a sub-Saharan  
24 African context, using qualitative research methods. We sought to explain therapeutic  
25 itineraries by conducting interviews with users of biomedical and traditional healthcare  
26 resources. These data were used to develop a general, conceptual framework that can  
27 inform future work in similar medically pluralistic settings.  
28

## 29 **METHODS**

### 30 **Study Setting and Design**

31  
32 This qualitative study was conducted in Mbarara District, Uganda, a rural district of  
33 418,000 residents located ~275 km southwest of the capital city of Kampala.  
34 Southwestern Uganda is a medically pluralistic context, where both traditional and  
35 biomedical modalities of healthcare co-exist[28-30].  
36  
37

38 The World Health Organization defines “traditional medicine practices” to include both  
39 medication and procedure-based treatments, including use of herbal remedies, manual  
40 physical manipulation, and spiritual therapies[5,14]. The scope of treatments delivered  
41 by healers throughout the world varies by location. In Uganda, traditional healers  
42 practice herbalism and spiritual healing[31]; they also set broken bones[32] and attend  
43 births in the community[33]. Spiritual healers attribute their powers to the *Bachwezi*,  
44 which are believed to be ancestral spirits from an ancient kingdom that previously  
45 occupied this region of eastern Africa[34,35]. For the purposes of this study, we  
46 excluded Christian or Muslim spiritual healers (i.e., “Born Again” or Pentecostal  
47 ministries), which have been extensively studied in sub-Saharan Africa as “faith healers”  
48 [18,36]. In Uganda, traditional healing is not formally recognized by the Ministry of  
49 Health; there is no centralized oversight of traditional healing training programs or  
50 services. This research was conducted as part of a multi-year, mixed methods study of  
51 HIV services engagement in a medically pluralistic community.  
52  
53

### 54 **Sampling and Recruitment**

55 Following a purposive sampling strategy, sixty (N=60) adults were identified to  
56 participate as key informants in this study, or “individuals that are especially  
57  
58  
59  
60

1  
2  
3 knowledgeable about or experienced with a phenomenon of interest”[37]. In our case,  
4 key informants were selected to represent variation in experiences of receiving  
5 modalities of healthcare: biomedical and traditional. That is, participants were patients  
6 representing two subgroups: (1) individuals receiving treatment from traditional healers  
7 (N=30), and (2) individuals receiving treatment from a biomedical general medicine  
8 outpatient clinic (N=30). Inclusion criteria for all participants were: 1) age  $\geq$ 18 years; 2)  
9 ability to provide informed consent; and 3) seeking healthcare at either a traditional  
10 healer or outpatient biomedical clinic in Mbarara District.  
11

12 Both verbal and written informed consent were obtained by Ugandan research  
13 assistants (RAs) prior to enrollment. After verbally reviewing the consent form, research  
14 staff used a 5-item questionnaire to assess whether the potential participant understood  
15 the study and consent process. This questionnaire posed questions critical to  
16 demonstrating consent, such as “How much time will this take you?”; “What are the  
17 possible benefits for you?”. If a potential participant demonstrated errors in  
18 understanding, these were corrected, and potential participants asked if they needed  
19 further clarification. If, after further attempts to clarify misunderstandings, study staff  
20 determined that the potential participant did not comprehend the consent process, or  
21 critical aspects of the study, they were not enrolled.  
22  
23

24 Participants in the traditional medicine subgroup were recruited from twelve traditional  
25 healer practices which reflected the range of healer specialties present in the study  
26 region: herbalist, bone setter, traditional birth attendant, and spiritual healer. All were  
27 located within 20 kilometers of Mbarara town center. It is well established that men tend  
28 to have low uptake of in healthcare services in sub-Saharan Africa[38-40]. In order to  
29 ensure that male perspectives were represented, we recruited two-thirds of participants  
30 at healer practices who were known to provide services for men. Therefore, more  
31 bonesetter and spiritual healer patients are included in the traditional healer group.  
32 Participants in the biomedical subgroup were recruited from Mbarara Municipality Clinic,  
33 a general outpatient government-run clinic in the town of Mbarara, which serves  
34 approximately 50,000 patients per year. Services at this clinic are provided free of  
35 charge.  
36  
37

38 At both traditional and biomedical facilities, RAs approached patients following  
39 completion of visits to assess eligibility and interest in participation. Potential participants  
40 were individually recruited by RAs, who visited recruitment sites once per week during  
41 business hours to screen for eligible patients. Recruitment visits were scheduled on  
42 random days of the week to maximize variation of participants included in this study. A  
43 maximum of two participants was enrolled during each site visit in order to allow ample  
44 time to review informed consent and conduct minimally-structured interviews. This  
45 approach ensured interview quality, and was central to the inductive data analysis  
46 process by providing time to review interview content, provide feedback to RAs, and  
47 identify preliminary codes (see “Data Collection” and “Analysis of Data” sections for  
48 more details). Biomedical clinic leadership and traditional healers gave permission for  
49 study staff to recruit patients at their practices. Recruitment was carried out over a period  
50 of six months (September 2017 - February 2018).  
51  
52

53 A target sample size of 30 participants per subgroup was guided by prior research  
54 suggesting that a range between 20 and 30 interviews is adequate to reach *thematic*  
55 *saturation*, the point at which no new concepts emerge from subsequent interviews[41-  
56 43]. After 30 interviews per group were conducted, the study authors agreed that  
57  
58  
59  
60

1  
2  
3 thematic saturation had been reached, and interview content no longer contained new or  
4 surprising content.  
5

### 6 **Data Collection**

7 Three Ugandan Research Assistants (RAs), two female and one male, with prior  
8 experience in conducting qualitative interviews in southwestern Uganda collected data  
9 for this study. Prior to initiation of data collection, all RAs took part in a three-day training  
10 session led by RS and JMA, which focused on the principles of qualitative research,  
11 approaches to conducting high quality interviews, and establishing standard procedures  
12 for interview translation and transcription. In addition, the RAs underwent intensive  
13 training with interview guide questions to ensure consistency of delivery and use  
14 throughout the study.  
15

16  
17 Each study participant took part in a single, individual, in-depth interview with one of  
18 these RAs. Interviews were conducted following an interview guide that included the  
19 following topics: 1) details of the patient's therapeutic itinerary for his/her current  
20 symptoms; 2) symptoms that motivated him/her to seek healthcare; 3) attitudes towards,  
21 and experiences with, traditional and biomedicine; and 4) details of concurrent or recent  
22 biomedical and traditional healer visits. The interview guide was created in English,  
23 translated to the local language (Runyankore), and back-translated into English to verify  
24 preservation of meaning. In addition, the interview guide was piloted with three  
25 traditional healers prior to initiation of data collection in August 2017; these responses  
26 were not included in our analysis.  
27

28  
29 Interviews lasted approximately one hour and were conducted in the local language  
30 (Runyankore), in private locations at either healer practices or at the participating  
31 biomedical clinic. Participants received the equivalent of 10,000 Ugandan Shillings  
32 (UGX, ~\$3 USD) in household staples (cooking oil, sugar, salt, soap) in recognition of  
33 the time and effort required to participate in the interview.  
34

35  
36 Interviews were digitally recorded, then transcribed and translated into English by the  
37 same RA who had conducted the interview. All transcripts were produced within 72  
38 hours of the interview being completed. The transcripts were reviewed line-by-line by the  
39 first author for quality, content, and to provide feedback to the RAs regarding strategies  
40 to improve interviewing techniques. This monitoring process allowed for RAs to receive  
41 consistent feedback to improve interviewing skills to ensure that interviews were  
42 consistently high quality, explored participants unique experiences, and focused on  
43 interview guide topics across interviewers. Though some variation is expected in  
44 qualitative interview data, we maximized the validity of our data by continuing enrollment  
45 until thematic saturation was reached in each participant group (please see "Sampling  
46 and Recruitment", above). English transcripts were spot-checked against audio  
47 recordings by an author (JMA, who is fluent in Runyankore and English) to ensure  
48 validity and integrity of translations.  
49

### 50 **Analysis of Data**

51 A three-step, inductive approach was used to analyze the qualitative data, as follows: (1)  
52 development of codes; (2) coding; and (3) category construction. We employed an  
53 interpretive phenomenological approach to data analysis[44,45], as the goal of this study  
54 was to explore participants' own experiences and perspectives on healthcare  
55 engagement.  
56  
57  
58  
59  
60

### Development of Codes.

Two authors (RS and JMA) reviewed transcripts within 72 hours of completion and corresponded weekly to identify and discuss emerging concepts. Guided by these discussions, the first author (RS) produced an initial set of codes, or labels that described key concepts in the dataset. Using an inductive strategy, this process was conducted while interviews were ongoing, providing overlap between qualitative interviewing and data analysis, allowing for iterative engagement with the dataset to identify concepts of interest. As additional transcripts were produced and reviewed, codes were reviewed and refined to fit the data. Using the “constant comparison” method, newly coded text segments were compared to text segments previously marked with the same code to determine if they reflected the same concept[46]. This process was repeated until all transcripts had been reviewed. A final list of codes was produced through discussion and consensus among three co-authors (RS, JMA and RK).

### Coding:

All study transcripts were coded, and re-coded when necessary, using the finalized list of codes. QSR NVivo 11 (QRS International Pty Ltd) was used for coding and data organization, but not in development of codes.

### Category Construction:

Next, coded data were examined and grouped to form conceptual categories, where data are aggregated based on similarities of meaning. Categories are defined below using text examples. Quotes from participants are shown as italicized and indented. Interrelationships between categories were identified to create a conceptual framework illustrating factors that influence health behavior in a pluralistic context (Figure 1).

### Ethical Statement:

This research was approved by the Human Research Protections Program Institutional Research Board at the University of California, San Diego (#170672), Weill Cornell Medical College (#1803019105), Mbarara University of Science and Technology Research Ethics Committee (#16/01-17) and the Ugandan National Council for Science and Technology (#SS4338). Participants provided written and verbal informed consent in Runyankore.

| Characteristic                                           | Traditional healer clients (N=30)                                                                | Biomedical clients (N=30)                                         |
|----------------------------------------------------------|--------------------------------------------------------------------------------------------------|-------------------------------------------------------------------|
| Report previously receiving care from alternate modality | N=30 (100%)                                                                                      | N=2 (7%)                                                          |
| Age (in years)                                           | 30 (median)<br>IQR = 20                                                                          | 28.5 (median)<br>IQR = 10.75                                      |
| Female gender (%)                                        | N = 16 (53%)                                                                                     | N= 18 (60%)                                                       |
| Primary school education or less                         | N= 14 (47%)                                                                                      | N = 13 (43%)                                                      |
| Household size (in persons)                              | 5 (median)<br>IQR = 3                                                                            | 4.5 (median)<br>IQR = 3.5                                         |
| Marital status                                           | Single (N = 7)<br>Married/Cohabiting (N = 21)<br>Widowed (N = 2)                                 | Single (N = 11)<br>Married/Cohabiting (N = 17)<br>Widowed (N = 2) |
| Christian religion                                       | N = 25 (83%)                                                                                     | N = 23 (77%)                                                      |
| Monthly household income (in USD)                        | \$41 (median),<br>IQR = 76                                                                       | \$22 (median)<br>IQR = 46                                         |
| Type of healer visited on day of enrollment              | Spiritualist (N=12)<br>Bonesetter (N=10)<br>Traditional birth attendant (N=4)<br>Herbalist (N=4) | N/A                                                               |

### RESULTS

#### Characteristics of Participants

Characteristics of study participants appear in Table 1. Over half of the sample had

1  
2  
3 clinical experience with both biomedical and traditional modalities of healthcare.  
4 However, pluralistic behaviors were much more commonly reported among patients of  
5 traditional healers. Only two participants recruited from the biomedical clinic reported  
6 prior experience receiving care from traditional healers (n=2/30, 7%); in contrast, all  
7 (n=30) traditional healer patients reported prior experience receiving biomedical  
8 treatment.  
9

10 Participants recruited from healer practice locations were slightly older, with a higher  
11 proportion being married, and with higher reported monthly incomes, compared to the  
12 biomedicine group. Biomedical participants were recruited from a government-run  
13 medical clinic, where they received health services at no cost. Therefore, we would  
14 expect lower household incomes, as they have preferentially sought to receive free  
15 medical care, rather than present to a fee-for-service facility. Other characteristics,  
16 including gender, household size, highest level of education, and religious affiliation,  
17 were similar between the two groups.  
18  
19

## 20 **Qualitative Results**

### 21 Overview

22 Our qualitative data indicate important perceived advantages and disadvantages to both  
23 healthcare modalities, which motivate patient engagement with available resources. We  
24 have developed three broad categories representing influences on therapeutic itineraries  
25 that were evident in the data. They are summarized as follows: 1) traditional healers  
26 treat patients with “care”; 2) biomedicine uses “modern” technologies; and 3) peer  
27 “testimony” influences healthcare engagement. Within each of these categories, we  
28 provide examples to illustrate how these factors drive plural healthcare engagement. We  
29 consider each one separately, below, and then present a conceptual model for how  
30 these factors interrelate to create therapeutic itineraries in southwestern Uganda.  
31  
32

### 33 *A. Traditional healers care about their patients*

34 Patients recruited from traditional healers report positive experiences with their care,  
35 specifically describing that treatments effectively relieve their symptoms. Participants  
36 state that they prefer traditional therapies because traditional practitioners “heal faster”.  
37 This efficient healing is sometimes attributed to the fact that traditional practitioners  
38 spend more time personally treating and caring for their patients, compared with  
39 healthcare workers in biomedical settings:  
40

41 *Those [bonesetters] are super! They heal faster than biomedical. When you*  
42 *take your patient to a bonesetter, he does not take long to get healed, compared*  
43 *to one in the hospital. In hospitals, the healing process is long because they do*  
44 *not do much more than hanging you there [in traction] and leave you. You can*  
45 *even become lame because they do not check to see whether you are healing or*  
46 *not. But for the healer, he does his reviews [checks your wound healing]*  
47 *constantly. (Bonesetter patient, female)*  
48

49 Patients receiving traditional care also state that they are treated with respect when  
50 visiting healers, and that healers are motivated to care for patients, rather than being  
51 strictly economically driven. Participants reported that healers attend to patients  
52 immediately, even if they did not have money; a few participants stated that healers  
53 allowed them to pay for services rendered in installments, or in kind (through farm  
54 goods). A participant seeking care from a traditional birth attendant described her  
55 preference for traditional healing, emphasizing the kindness of her practitioner:  
56  
57  
58  
59  
60



1  
2  
3  
4 *[The healer] does everything for you. Her services are excellent. In fact, when*  
5 *you deliver [your children] from here, you do not even think of going elsewhere*  
6 *another time. She cares so much about her clients. In fact, for all my*  
7 *pregnancies, I received antenatal care from this healer. She is my neighbor, and*  
8 *instead of going to sit at the hospital the whole day waiting for checkup, I come*  
9 *here. She is my neighbor and her services are good. So, I come get my antenatal*  
10 *checkup, and go back home to do my chores. (Traditional birth attendant patient,*  
11 *female)*  
12

13  
14 In contrast, patients describe experiences with biomedicine with narratives of disrespect,  
15 mistreatment, neglect or “abuse”. The central message of these biomedical testimonies  
16 is that healthcare workers do not care about their patients. In some cases, participants  
17 referred to these accounts while explaining why they tend to avoid biomedical facilities.  
18 A woman describes her experience receiving antenatal care at the local hospital:  
19

20 *I came to this hospital for antenatal care and found a nurse who treated me*  
21 *badly. She would tell you to lay on the bed and instead of telling you what to do,*  
22 *she would shout at you and say, “Don’t face me! Face the other side!” in a loud*  
23 *voice, and you wonder what the problem was. She embarrassed me and I felt*  
24 *ashamed. I promised myself never to return in this hospital .... She would only*  
25 *shout at us. She was horrible. (Biomedical patient, female)*  
26

27  
28 A number of participants describe experiences at biomedical facilities where they are  
29 never attended to by biomedical staff, despite waiting for many hours – sometimes  
30 spending the entire day without receiving medical attention. These hours spent waiting  
31 come at the expense of childcare, household duties and income-generating activities.  
32 One man describes his experience seeking biomedical care for a toothache as follows:  
33

34 *I went to the referral hospital and spent there the whole day without treatment.*  
35 *The following morning, when I went back, I was given only Panadol*  
36 *[Acetaminophen]. I felt so sad. (Biomedical patient, male)*  
37

38 Another patient states that he gave up after waiting all day for a voluntary circumcision  
39 procedure:  
40

41 *You reach there and sit for the whole day without treatment. Drugs are never*  
42 *there and health workers do not attend to patients as it should be. They arrive at*  
43 *work late and leave work early. They are really bad. I went [to the clinic] one time*  
44 *for circumcision and sat there for many hours until I got hungry and gave up. I left*  
45 *without seeing any doctor. (Bonesetter patient, male)*  
46

#### 47 **B. Biomedicine uses modern technologies to heal**

48 Participants state that biomedical care is preferred in instances where “modern”  
49 technologies can be utilized to provide a diagnosis for one’s symptoms, and guide  
50 treatment. Through blood and radiological tests, healthcare providers can identify the  
51 specific cause of a patient’s illness, and provide appropriate care. Patients perceive that  
52 the information generated by biomedical technology validates the therapies administered  
53 to them:  
54  
55  
56  
57  
58  
59  
60

1  
2  
3 *They use machines to diagnose and test for conditions. They give the right*  
4 *medical information. (Biomedical patient, male).*  
5

6 Having received a specific diagnosis, participants also believe that the treatment  
7 recommended by healthcare workers will be effective in alleviating their symptoms. For  
8 example, one participant described how appropriate medicines have the capacity to  
9 heal, even if taken in small amounts:  
10

11 *When you come [to the clinic] you get diagnosed and they write for you a*  
12 *prescription and you get the medicine then their service is good ... Even if you*  
13 *get very little medicine from them and take it, you get healed. (Biomedical*  
14 *patient, female)*  
15

16  
17 Another patient explains why the capacity to intervene with modern biomedical  
18 technology is more effective in treating symptoms than traditional medicine:  
19

20 *Biomedical facilities are good ... when you are, for instance, in a critical*  
21 *condition, they can put you on life support machines, or they can put you on a*  
22 *drip. They can also give you tablets and injections that can help you. Traditional*  
23 *healers can't manage something like that. They don't have modern equipment.*  
24 *They don't have tablets, and they don't have drips and injections. (Bonesetter*  
25 *patient, male)*  
26

27 Results from biomedical testing guide what some participants describe as “proper”,  
28 effective treatment, compared with traditional healing where therapies are provided in  
29 the absence of any diagnostic testing:  
30

31 *[Biomedical facilities] diagnose you and inform you of the ailment that you are*  
32 *suffering from, and at times inform you that your health is okay ... When you visit*  
33 *biomedical health facilities they diagnose you and inform you of your results and*  
34 *in case you are HIV positive, you can start on medicine ... [Traditional healers]*  
35 *don't have equipment to diagnose, so how do they diagnose for conditions? ... I*  
36 *don't trust them. (Biomedical patient, Female)*  
37  
38

39 While biomedicine is favored for its use of diagnostic technologies, other participants  
40 describe preference for traditional healing *specifically because* these approaches could  
41 enable avoidance of biomedical procedures, which participants describe as  
42 “unnecessary” and having high morbidity and mortality. Participants state that an  
43 advantage of traditional healing is that it supports the body to heal “naturally”, rather  
44 requiring modern, invasive interventions. Participants report seeking traditional care after  
45 having been told by biomedical providers that they would require an operation in order to  
46 recover. Those who ultimately healed after receiving traditional care declared that  
47 biomedical providers rush to use modern technologies, instead of allowing the body to  
48 heal on its own. One patient describes his experience receiving care from a bonesetter,  
49 after suffering severe extremity fractures after falling from a motorcycle:  
50

51 *[The hospital staff] told me that the doctors will cut off my leg because it was*  
52 *badly injured and that there was no way they could fix it ... When we reached*  
53 *[this healer], they told me that the bone that joins the knee was broken but*  
54 *promised that since I was in that place, in two to three weeks, I will be able to*  
55 *walk again. They then aligned my leg and started the treatment ... I am now*  
56  
57  
58  
59

1  
2  
3 *getting better. If I had remained at the hospital, I know my leg would have been*  
4 *cut off by now. (Bonesetter patient, male)*  
5

6 Another patient describes how effective treatment from an herbalist allowed her sister to  
7 avoid a Caesarean section with her twin pregnancy:  
8

9 *These healers are very useful ... my elder sister had a problem with her twin*  
10 *pregnancy. She was stuck with the pregnancy because the babies could not*  
11 *move. They took her to one of the traditional healers and was given medicine*  
12 *which helped her so much and she delivered her babies without difficulties. We*  
13 *thought she would be operated on while giving birth [via Caesarean section]*  
14 *because the doctors at referral hospital had told her that she will not manage to*  
15 *push and advised her to go for an operation, which did not happen because of*  
16 *the medicine the healer gave her. (Spiritual healer patient, female)*  
17  
18

19 Participants described fear of utilizing biomedical facilities to deliver their children, as  
20 they believed that physicians would perform unnecessary Caesarian sections,  
21 considered a high-risk procedure for both mothers and infants:  
22

23 *[Doctors] rush women to the operating theatre when it's not necessary. Many*  
24 *women and babies have lost their lives due to the negligence of doctors. Women*  
25 *fear to deliver from hospital. (Spiritual healer patient, male)*  
26

### 27 C. Peer "testimony" influences healthcare engagement

28 Our participants recount social narratives, or "testimonies" which describe healthcare  
29 experiences among peers within their communities. These discursive events evaluate a  
30 provider's competence and effectiveness in addressing ailments, and describe negative  
31 or positive outcomes of treatments. Participants indicate that peer testimonies strongly  
32 influence where they choose to seek care for their symptoms. We found that biomedical  
33 narratives frequently reinforced individual reports of mistreatment; in contrast, narratives  
34 about traditional healing were generally positive and affirmed the "real" nature of this  
35 form of healthcare.  
36

37  
38 Numerous participants who received care from traditional healers describe negative peer  
39 narratives about biomedicine. A participant describes the testimony from his neighbor  
40 that influenced his decision to seek care from a traditional bonesetter:  
41

42 *My neighbor reached [the referral hospital after injuring his leg], but nothing much*  
43 *was done. They made him sit on the waiting bench and the doctor told the*  
44 *caretaker to go and buy a bandage and find an empty box. The doctor then*  
45 *dismantled the box and tied it on the leg using the bandage and left him there.*  
46 *He remained there until morning. .... He never got any treatment [for the leg*  
47 *injury] apart from the empty boxes they tied on the leg. I will never forget what he*  
48 *experienced from the referral hospital. It was so bad and so discouraging. Health*  
49 *workers do not care about patients. (Bonesetter patient, male)*  
50

51 A number of participants recalled community narratives indicating that healthcare  
52 workers would intentionally withhold treatment or harm their patients. One woman  
53 seeking care at a traditional birth attendant practice describes stories that made her fear  
54 that she would be harmed at the hands of healthcare workers:  
55  
56  
57  
58  
59  
60

1  
2  
3  
4  
5  
6  
7  
8  
9  
10  
11  
12  
13  
14  
15  
16  
17  
18  
19  
20  
21  
22  
23  
24  
25  
26  
27  
28  
29  
30  
31  
32  
33  
34  
35  
36  
37  
38  
39  
40  
41  
42  
43  
44  
45  
46  
47  
48  
49  
50  
51  
52  
53  
54  
55  
56  
57  
58  
59  
60

*There was a woman in labor who was supposed to be taken to the operating theatre but the nurses asked her for money, which she did not have. They refused to work on her until other patients contributed some money and gave it to the nurses ... Those nurses do not mind whether you die from there or not ... There is also one mother I heard about who took her child for immunization and got an argument with the nurse. Intentionally the nurse gave the child overdose and the child died. Some of these health workers are so wicked. (Traditional birth attendant patient, female)*

Negative peer testimonies were not limited to patients of healers. For example, one woman seeking biomedical care told a story about her neighbor suffering mistreatment at the same facility.

*My pregnant neighbor delivered her baby in the village compound. [When they arrived at this hospital for post-partum care], the nurse abused her, saying that she should take her stupidity back to her village. They do not care. (Biomedical patient, female).*

In stark contrast to narratives surrounding biomedical care, peer testimony surrounding traditional healing is largely positive. Healers are lauded for their effective care, and patients are guided by peer testimonials in selecting which healer to visit for their ailments. One participant seeking care at a traditional herbalist describes the impact of peer endorsements on her decision to seek care from this particular healer:

*This healer is popular and well known, and wherever you go, people will recommend her to treat your sick child ... I have seen so many different people come here to receive treatment ... I am impressed. (Spiritual healer patient, male).*

A central concept in many testimonies about traditional medicine is the genuineness of the healer, and how they should be set apart from traditional healers who may be “fake” or “quacks”. One participant describes how testimonies from peers with similar injuries directed him to seek care from a specific bonesetter, and how testimonies generate more patients for particular healers:

*Most traditional healers are quacks, and personally I don't trust them. [Interviewer: Then how do you know that you will heal from this treatment?] I get the confidence from other people who have been treated here. There is a man from a nearby dairy. He bones were more severely broken than mine, but he healed from here, and is now doing his work. I have heard many people's testimonies that they have been healed from here ... When I come here and get healed, I will direct another one because he will be healed too and that person will also direct others... A healer who is real does not need to advertise on the radios because the people they heal create market for them. (Bonesetter patient, male)*

#### *D. Conceptual Model*

Figure 1 presents a conceptual model integrating our findings to show how influences at the healthcare provider, healthcare system, and peer levels influence individual engagement with healthcare in pluralistic settings. These variables interact to shape an individual's therapeutic itinerary, but not necessarily in a stepwise manner. For

1  
2  
3 healthcare users, one or more characteristics of a healthcare system may be of  
4 paramount importance in determining use of this resource, but each modality comes with  
5 potential disadvantages. Negative experiences could prompt users to switch to the  
6 alternate modality. We heard this process described by participants who believed their  
7 ailments were initially mismanaged by biomedical providers, and were subsequently  
8 healed using traditional approaches. Similarly, positive experiences contribute towards  
9 continued use of a healthcare modality, and an individual may become reticent to  
10 engage with the alternative in light of continued positive health outcomes.  
11

## 12 **DISCUSSION**

13 This study identified variables that drive engagement with healthcare resources in a  
14 medically pluralistic setting, and identified three central factors that contribute to  
15 therapeutic pluralism. These may be summarized as follows: 1) traditional healers care  
16 about their patients, while biomedical providers do not; 2) biomedical technologies can  
17 provide diagnosis and guide treatment, but these technologies are sometimes  
18 intentionally avoided; and 3) peer testimonies influence healthcare utilization, largely in  
19 favor of traditional healing. These can be considered conceptually as factors operating at  
20 the healthcare provider, healthcare system, and peer levels (Figure 1).  
21  
22

23 Our work illustrates how healthcare provider characteristics are of central importance to  
24 patients. The quality of interpersonal interactions can either motivate or deter  
25 engagement with healthcare services. We found that patient-provider interactions with  
26 traditional healers are described as generally respectful and supportive, while patient-  
27 provider interactions in biomedical contexts included narratives of neglect and “abuse”.  
28 These findings align prior work showing that initial choice of therapeutic modality in  
29 pluralistic contexts is driven by perceived trustworthiness of a healthcare provider[18,47-  
30 50]. Our participant accounts of negative interactions with biomedical staff are congruent  
31 with prior work linking negative interactions with disengagement with HIV care among  
32 people living with HIV[51-53], decreased HIV pre-exposure prophylaxis (PrEP) utilization  
33 among key populations[54] and lack of healthcare facility use among pregnant  
34 women[55-57].  
35  
36

37 We also describe how some characteristics of the available healthcare systems impact  
38 healthcare engagement. Our results speak to the hegemony of biomedicine in Uganda,  
39 and more broadly throughout post-colonial sub-Saharan Africa, where biomedicine is  
40 highly valued, and may be considered of superior quality and efficacy compared with  
41 traditional healing[58,59]. Some participants report gaining reassurance through  
42 laboratory and radiologic testing to guide diagnosis and therapy, describing this as  
43 “proper” treatment. We note that the desire for healthcare directed by “modern” test  
44 results is the central factor favoring biomedical healthcare utilization among our  
45 participants. Interestingly, other data from high-resource contexts has shown that  
46 diagnostic test results do not increase patient reassurance or decrease health-related  
47 anxiety in outpatient biomedical settings[60,61]. However, in our medically pluralistic  
48 study site, the capacity of biomedical facilities to perform diagnostic testing is distinctive  
49 in contrast to traditional medicine approaches, and therefore some patients consider  
50 access to testing as a benefit.  
51  
52

53 Traditional healthcare is sometimes preferred as a means to avoid invasive procedures,  
54 such as orthopedic fixation, limb amputation, or Caesarean section. Our findings are  
55 congruent with prior research demonstrating avoidance of facility-based obstetric  
56 services, preference for traditional home birth[30,57,62], and bonesetters to heal  
57  
58  
59  
60

1  
2  
3 orthopedic injuries in sub-Saharan Africa[32,63]. Motivation to avoid invasive operative  
4 procedures is further explained by poor post-operative outcomes throughout sub-  
5 Saharan Africa[64]. For example, maternal mortality after Caesarean section is fifty  
6 times higher in Africa compared with high income countries[65]. As such, patients  
7 consider invasive biomedical procedures high risk, and seek to avoid them through  
8 receipt of traditional therapies.  
9

10 Additionally, we note that the content of peer testimonies strongly influences patients'  
11 decisions to utilize traditional or biomedical care. Peer influences have been shown to  
12 have strong impact on individual healthcare engagement in the cases of HIV services  
13 utilization[66-68], adolescent health[69,70], mental health[71], and substance  
14 misuse[72], for example. Our study shows how peer testimonies serve as endorsements  
15 of traditional healing, legitimizing its use through descriptions of clinical effectiveness. In  
16 contrast, largely negative narratives regarding biomedicine potentiate avoidance of these  
17 facilities and services.  
18  
19

20 Our findings provide insight on how patients decide to engage with particular healthcare  
21 resources, and can guide efforts to improve healthcare quality and interventions in  
22 medically pluralistic communities. Importantly, our conceptual model can direct  
23 strategies to engage those who may avoid biomedical resources, and have low uptake  
24 of conventional healthcare outreach program, which are frequently facility-based, and/or  
25 delivered by biomedical providers. Our data suggest that healthcare users value the  
26 interpersonal interactions and trustworthiness of healers, but also may gain reassurance  
27 through receipt of biomedical testing and diagnostic technologies. An ideal health  
28 resource in a pluralistic context would potentially incorporate all of these valuable  
29 attributes. Traditional healers in Ghana have taken this approach, utilizing components  
30 of biomedical knowledge through reference to medical textbooks and "Google"[73].  
31 Similarly, we know of healers in Mbarara District who use glucometers, blood pressure  
32 cuffs, and performed commercially available rapid diagnostics tests for HIV and malaria.  
33 Our data suggest that decentralized healthcare services would be highly acceptable  
34 among pluralistic communities. An example of his approach at the national health policy  
35 level is demonstrated in the case of "differentiated care" for PLHIV[74], where service  
36 delivery is tailored to the needs of PLHIV in their communities, and biomedical facility  
37 visits are minimized.  
38  
39

40 Finally, our data contribute to a body of work that emphasizes the important role of  
41 traditional healers within the communities they serve. We hope our findings explain the  
42 persistent appeal of traditional medicine, and demonstrate that pluralistic behavior  
43 should be considered more than 'an inconvenient truth' for biomedical providers,  
44 researchers and policy makers. Low biomedical engagement in pluralistic settings  
45 should not simply be attributed to lack of access to formal resources, but should be  
46 considered an individual's informed healthcare choice. We recommend that researchers  
47 and policy makers involve traditional healers when designing and implementing  
48 community-based health initiatives because healers are well positioned allies for  
49 healthcare programs. Community members may consider healers more trustworthy than  
50 biomedical providers[50]. Biomedicine could learn a great deal from healers regarding  
51 the power of interpersonal relationships as part of the healthcare process[75,76]. For  
52 example, Moshabela et. al. (2016) considered the roles of traditional healers in the  
53 context of a community-wide HIV testing and treatment intervention. They found that  
54 healers boosted impact and acceptability of the intervention through educating clients on  
55 HIV-related stigma and supporting linkage to HIV care[77].  
56  
57  
58  
59  
60

1  
2  
3  
4 Many studies have shown that healers are interested in working with biomedical  
5 providers to improve health outcomes for their patients[23,78,79]. However, the  
6 converse is not typically the case. Biomedical objections to traditional healing largely  
7 focus on use of alternatively explanatory mechanisms (such as belief that evil spirits or  
8 bad luck may cause physical symptoms), lack of standardized training and oversight of  
9 practices, and delivery of varying concentrations or mixtures of herbal therapies[80]. In  
10 fact, negative attitudes towards traditional medicine have been described as the primary  
11 barrier to true collaboration between traditional and biomedicine, as biomedical providers  
12 repeatedly downplay the skills and contributions of traditional healers[81,82]. Biomedical  
13 providers may express distrust and disapproval of traditional medicine in interactions  
14 with their patients[81-83]. Related to this lack of trust is the observation that our  
15 participant groups reported markedly different experiences with pluralistic healthcare  
16 utilization. Most biomedical participants denied prior use of traditional medicine, while  
17 most traditional medicine users reported having previously sought biomedical care. This  
18 difference in self-reporting is likely an example of a well described phenomenon, where  
19 patients are reticent to disclose traditional medicine use in the context of receiving  
20 biomedical care[6,83,84]. Therefore, we suspect that participants seeking care in the  
21 biomedical context under-reported traditional medicine use due to fear of social  
22 judgement.  
23  
24

25 There are a few limitations of this study. We acknowledge that baseline characteristics of  
26 participants recruited from traditional healer practices are different than those recruited  
27 from an outpatient biomedical practice. Qualitative samples are intended to be relevant  
28 to the research question, and may not be representative, as would be prioritized in a  
29 quantitative study. We did not record medical histories for our participants, and cannot  
30 speak to how particular diagnoses may motivate to healthcare itinerary, beyond the  
31 symptoms prompting the current visit. This study includes only people seeking  
32 healthcare from traditional healers, and similar work is needed for those seeking care  
33 from faith healers. Further, we acknowledge the potential impact of social judgement and  
34 recognize that some biomedical participants may have been reticent to share positive  
35 feelings about traditional medicine during their interviews. Last, our qualitative data  
36 indicate multiple directions for future research. For example, what are strategies to  
37 facilitate bidirectional cooperation between traditional and biomedical systems? How  
38 would one design and implement a decentralized healthcare initiative in cooperation with  
39 traditional healers?  
40  
41

## 42 **CONCLUSIONS**

43 Patients perceive clear advantages and disadvantages to biomedical and traditional care  
44 in medically pluralistic settings. We identified factors at the healthcare provider,  
45 healthcare system, and peer levels which can influence patients' therapeutic itineraries,  
46 and illustrate why traditional medicine is sometimes preferred. Our findings can inform  
47 community-based, public health interventions in medically pluralistic contexts, and  
48 underscore the importance of recognizing and engaging with traditional healers as  
49 important stakeholders in community health.  
50

## 51 **ACKNOWLEDGEMENTS**

52 The authors would like to acknowledge the work of our research assistants, Patricia  
53 Tushemereirwe, Donny Ndazima and Doreen Nabukalu. We also appreciate the  
54 thoughtful comments provided by three manuscript reviewers. Finally, we are grateful to  
55  
56  
57  
58  
59  
60

1  
2  
3 the traditional healers and patients in Mbarara District for sharing their experiences with  
4 us.  
5

### 6 **CONTRIBUTORSHIP STATEMENT**

7 RS conceived of the study. RK and JMA provided input on study design, study  
8 procedures. RS and JMA oversaw data collection. RS was primarily responsible for data  
9 analysis, with input from JMA, RK and NW. RS composed the first draft of the  
10 manuscript. All authors provided input and approve of the final submission.  
11

### 12 **COMPETING INTERESTS**

13 The authors declare no competing interests.  
14  
15

### 16 **FUNDING**

17 This study was supported by the National Institutes of Health (K23 MH111409), PI:  
18 Sundararajan. RK is supported by the National Institutes of Health (R01 MH109337).  
19 The study funder did not have any role in the study design, collection, analysis,  
20 interpretation of data, nor in the decision to submit the article for publication. All authors  
21 are independent from the funders, and had full access to all of the data. All authors take  
22 responsibility for the integrity of the data and accuracy of the data analysis.  
23

### 24 **DATA SHARING STATEMENT**

25 Deidentified data may be shared upon reasonable request by emailing the first author.  
26  
27

### 28 **PATIENT AND PUBLIC INVOLVEMENT STATEMENT**

29 Patients were included as participants in this study. They did not directly participate in  
30 the design or implementation of the study, as the purpose of the study was to elicit  
31 patient perspectives on community healthcare resources. Results of this study were  
32 used to guide development of a study community advisory board, which includes  
33 patients and other stakeholders, including healthcare providers, traditional healers and  
34 community leaders.  
35  
36

### 37 **REFERENCES**

- 38  
39 1 Shih C-C, Su Y-C, Liao C-C, *et al.* Patterns of medical pluralism among adults:  
40 results from the 2001 National Health Interview Survey in Taiwan. *BMC Health*  
41 *Services Research* 2010;**10**:191. doi:10.1186/1472-6963-10-191  
42  
43 2 Wade C, Chao M, Kronenberg F, *et al.* Medical pluralism among American women:  
44 results of a national survey. *J Womens Health (Larchmt)* 2008;**17**:829–40.  
45 doi:10.1089/jwh.2007.0579  
46  
47 3 Hughes GD, Puoane TR, Clark BL, *et al.* Prevalence and Predictors of Traditional  
48 Medicine Utilization among Persons Living With AIDS (PLWA) on Antiretroviral  
49 (ARV) and Prophylaxis Treatment in both Rural and Urban Areas in South Africa.  
50 *Afr J Tradit Complement Altern Med* 2012;**9**:470–84. doi:10.4314/ajtcam.v9i4.4  
51  
52 4 Broom A, Wijewardena K, Sibbritt D, *et al.* The use of traditional, complementary  
53 and alternative medicine in Sri Lankan cancer care: results from a survey of 500  
54 cancer patients. *Public Health* 2010;**124**:232–7. doi:10.1016/j.puhe.2010.02.012  
55  
56  
57  
58  
59  
60



- 1  
2  
3 5 World Health Organization. WHO Traditional Medicine Strategy 2014 - 2023.  
4 <http://apps.who.int/medicinedocs/pdf/s2297e/s2297e.pdf>. 2013;:1–  
5 74. <http://apps.who.int/medicinedocs/pdf/s2297e/s2297e.pdf> (accessed 30  
6 Dec2015).
- 7  
8 6 James PB, Wardle J, Steel A, *et al.* Traditional, complementary and alternative  
9 medicine use in Sub-Saharan Africa: a systematic review. *BMJ Glob Health*  
10 2018;**3**:e000895. doi:10.1136/bmjgh-2018-000895
- 11  
12 7 Makundi EA, Malebo HM, Mhame P, *et al.* Role of traditional healers in the  
13 management of severe malaria among children below five years of age: the case of  
14 Kilosa and Handeni Districts, Tanzania. *Malar J* 2006;**5**:58. doi:10.1186/1475-2875-  
15 5-58
- 16  
17 8 Saifodine A, Gudo PS, Sidat M, *et al.* Patient and health system delay among  
18 patients with pulmonary tuberculosis in Beira city, Mozambique. *BMC Public Health*  
19 2013;**13**:559. doi:10.1186/1471-2458-13-559
- 20  
21 9 Beiersmann C, Sanou A, Wladarsch E, *et al.* Malaria in rural Burkina Faso: local  
22 illness concepts, patterns of traditional treatment and influence on health-seeking  
23 behaviour. *Malar J* 2007;**6**:106. doi:10.1186/1475-2875-6-106
- 24  
25 10 Taylor TN, Dolezal C, Tross S, *et al.* Comparison of HIV/AIDS-specific quality of life  
26 change in Zimbabwean patients at western medicine versus traditional African  
27 medicine care sites. *JAIDS Journal of Acquired Immune Deficiency Syndromes*  
28 2008;**49**:552–6. doi:10.1097/QAI.0b013e31818d5be0
- 29  
30 11 Wanyama JN, Tsui S, Kwok C, *et al.* Persons living with HIV infection on  
31 antiretroviral therapy also consulting traditional healers: a study in three African  
32 countries. *International Journal of STD & AIDS* 2017;**28**:1018–27.  
33 doi:10.1177/0956462416685890
- 34  
35 12 Liwa A, Roediger R, Jaka H, *et al.* Herbal and Alternative Medicine Use in  
36 Tanzanian Adults Admitted with Hypertension-Related Diseases: A Mixed-Methods  
37 Study. *Int J Hypertens* 2017;**2017**:5692572–9. doi:10.1155/2017/5692572
- 38  
39 13 Hughes GD, Aboyade OM, Beauclair R, *et al.* Characterizing Herbal Medicine Use  
40 for Noncommunicable Diseases in Urban South Africa. *Evid Based Complement*  
41 *Alternat Med* 2015;**2015**:736074–10. doi:10.1155/2015/736074
- 42  
43 14 World Health Organization. *The promotion and development of traditional medicine.*  
44 Geneva: : World Health Organization Technical Report Series 1978.
- 45  
46 15 Green EC, Jurg A, Dgedge A. Sexually-transmitted diseases, AIDS and traditional  
47 healers in Mozambique. *Med Anthropol* 1993;**15**:261–81.  
48 doi:10.1080/01459740.1993.9966094
- 49  
50 16 Broom A, Doron A, Tovey P. The inequalities of medical pluralism: Hierarchies of  
51 health, the politics of tradition and the economies of care in Indian oncology. *Soc*  
52 *Sci Med* 2009;**69**:698–706. doi:10.1016/j.socscimed.2009.07.002
- 53  
54  
55  
56  
57  
58  
59

- 1  
2  
3 17 Moshabela M, Pronyk P, Williams N, *et al.* Patterns and implications of medical  
4 pluralism among HIV/AIDS patients in rural South Africa. *AIDS Behav*  
5 2011;**15**:842–52. doi:10.1007/s10461-010-9747-3  
6  
7 18 Moshabela M, Bukenya D, Darong G, *et al.* Traditional healers, faith healers and  
8 medical practitioners: the contribution of medical pluralism to bottlenecks along the  
9 cascade of care for HIV/AIDS in Eastern and Southern Africa. *Sex Transm Infect*  
10 2017;**93**:e052974. doi:10.1136/sextrans-2016-052974  
11  
12 19 Audet CM, Blevins M, Rosenberg C, *et al.* Symptomatic HIV-Positive Persons in  
13 Rural Mozambique Who First Consult a Traditional Healer Have Delays in HIV  
14 Testing : A Cross-Sectional Study. *Journal of Acquired Immune Deficiency*  
15 *Syndrome* 2014;**66**:80–6.  
16  
17 20 Pantelic M, Cluver L, Boyes M, *et al.* Medical Pluralism Predicts Non-ART Use  
18 among Parents in Need of ART: A Community Survey in KwaZulu-Natal, South  
19 Africa. *AIDS Behav* 2014;**19**:137–44. doi:10.1007/s10461-014-0852-6  
20  
21 21 Manguvo A, Mafuvadze B. The impact of traditional and religious practices on the  
22 spread of Ebola in West Africa: time for a strategic shift. *Pan Afr Med J* 2015;**22**  
23 **Suppl 1**:9. doi:10.11694/pamj.suppl.2015.22.1.6190  
24  
25 22 Iskandarsyah A, de Klerk C, Suardi DR, *et al.* Consulting a traditional healer and  
26 negative illness perceptions are associated with non-adherence to treatment in  
27 Indonesian women with breast cancer. *Psychooncology* 2014;**23**:1118–24.  
28 doi:10.1002/pon.3534  
29  
30 23 King R, Homsy J. Involving traditional healers in AIDS education and counselling in  
31 sub-Saharan Africa: a review. *AIDS* 1997;**11 Suppl A**:S217–25.  
32  
33 24 Homsy J, King R. The role of traditional healers in HIV / AIDS counselling in  
34 Kampala, Uganda. Key issues and debates: traditional healers. *Soc Afr SIDA*  
35 1996;**2**:2–3.  
36  
37 25 Peltzer K, Mngqundaniso N, Petros G. A controlled study of an HIV/AIDS/STI/TB  
38 intervention with traditional healers in KwaZulu-Natal, South Africa. *AIDS Behav*  
39 2006;**10**:683–90. doi:10.1007/s10461-006-9110-x  
40  
41 26 Audet CM, Hamilton E, Hughart L, *et al.* Engagement of Traditional Healers and  
42 Birth Attendants as a Controversial Proposal to Extend the HIV Health Workforce.  
43 *Curr HIV/AIDS Rep* 2015;**12**:238–45. doi:10.1007/s11904-015-0258-8  
44  
45 27 Akol A, Moland KM, Babirye JN, *et al.* 'We are like co-wives': Traditional healers'  
46 views on collaborating with the formal Child and Adolescent Mental Health System  
47 in Uganda. *BMC Health Services Research* 2018;**18**:258–9. doi:10.1186/s12913-  
48 018-3063-4  
49  
50 28 Horwitz RH, Tsai AC, Maling S, *et al.* No Association Found Between Traditional  
51 Healer Use and Delayed Antiretroviral Initiation in Rural Uganda. *AIDS Behav*  
52 2012;**17**:260–5. doi:10.1007/s10461-011-0132-7  
53  
54  
55  
56  
57  
58  
59  
60

- 1  
2  
3 29 Sundararajan R, Mwanga-Amumpaire J, Adrama H, *et al*. Sociocultural and  
4 Structural Factors Contributing to Delays in Treatment for Children with Severe  
5 Malaria: A Qualitative Study in Southwestern Uganda. *American Journal of Tropical*  
6 *Medicine and Hygiene* 2015;**92**:933–40. doi:10.4269/ajtmh.14-0784  
7
- 8 30 Kyomuhendo GB. Low use of rural maternity services in Uganda: impact of  
9 women's status, traditional beliefs and limited resources. *Reproductive Health*  
10 *Matters* 2003;**11**:16–26. doi:10.1016/S0968-8080(03)02176-1  
11
- 12 31 Konde-Lule J, Gitta SN, Lindfors A, *et al*. Private and public health care in rural  
13 areas of Uganda. *BMC Int Health Hum Rights* 2010;**10**:29. doi:10.1186/1472-698X-  
14 10-29  
15
- 16 32 Kisitu DK, Eyler LE, Kajja I, *et al*. A pilot orthopedic trauma registry in Ugandan  
17 district hospitals. *J Surg Res* 2016;**202**:481–8. doi:10.1016/j.jss.2015.12.028  
18
- 19 33 Ndyomugenyi R, Neema S, Magnussen P. The use of formal and informal services  
20 for antenatal care and malaria treatment in rural Uganda. *Health Policy Plan*  
21 1998;**13**:94–102.  
22
- 23 34 van Duijl M, Kleijn W, de Jong J. Unravelling the spirits' message: a study of help-  
24 seeking steps and explanatory models among patients suffering from spirit  
25 possession in Uganda. *Int J Ment Health Syst* 2014;**8**:24. doi:10.1186/1752-4458-8-  
26 24  
27
- 28 35 Berger I, Buchanan C. The Cwezi cults and the history of western Uganda. In:  
29 Gallagher JT, ed. *East African Culture History*. Syracuse: 1976.  
30
- 31 36 Downs JA, Mwakisole AH, Chandika AB, *et al*. Educating religious leaders to  
32 promote uptake of male circumcision in Tanzania: a cluster randomised trial. *The*  
33 *Lancet* 2017;**389**:1124–32. doi:10.1016/S0140-6736(16)32055-4  
34
- 35 37 Palinkas LA, Horwitz SM, Green CA, *et al*. Purposeful Sampling for Qualitative Data  
36 Collection and Analysis in Mixed Method Implementation Research. *Adm Policy*  
37 *Ment Health* 2015;**42**:533–44. doi:10.1007/s10488-013-0528-y  
38
- 39 38 Camlin CS, Ssemmondo E, Chamie G, *et al*. Men 'missing' from population-based  
40 HIV testing: insights from qualitative research. *AIDS Care* 2016;**28 Suppl 3**:67–73.  
41 doi:10.1080/09540121.2016.1164806  
42
- 43 39 Boum Y, Atwine D, Orikiriza P, *et al*. Male Gender is independently associated with  
44 pulmonary tuberculosis among sputum and non-sputum producers people with  
45 presumptive tuberculosis in Southwestern Uganda. *BMC Infect Dis* 2014;**14**:638.  
46 doi:10.1186/s12879-014-0638-5  
47
- 48 40 Chikovore J, Gillespie N, McGrath N, *et al*. Men, masculinity, and engagement with  
49 treatment as prevention in KwaZulu-Natal, South Africa. *AIDS Care* 2016;**28 Suppl**  
50 **3**:74–82. doi:10.1080/09540121.2016.1178953  
51
- 52 41 Creswell JW. *Qualitative Inquiry & Research Design*. 2007.  
53  
54  
55  
56  
57  
58  
59

- 1  
2  
3 42 Patton MQ. *Qualitative Evaluation and Research Methods*. SAGE Publications, Incorporated 1990.  
4  
5  
6 43 Morse JM. Determining sample size. 2000.  
7  
8 44 Smith JA, Flowers P, Larkin M. *Interpretive Phenomenological Analysis*. Sage Publications 2009.  
9  
10  
11 45 Smith J, Osborn M. Interpretive phenomenological analysis. In: Smith JA, ed. *Qualitative Psychology*. 2015. 53–80.  
12  
13  
14 46 Glaser BG, Strauss A. *The Discovery of Grounded Theory: Strategies for Qualitative Research*. Chicago: : Aldine 1967.  
15  
16  
17 47 Littlewood RA, Vanable PA. A Global Perspective on Complementary and Alternative Medicine Use Among People Living with HIV/AIDS in the Era of Antiretroviral Treatment. *Curr HIV/AIDS Rep* 2011;**8**:257–68. doi:10.1007/s11904-011-0090-8  
18  
19  
20  
21  
22 48 Finkler K. Sacred Healing and Biomedicine Compared. *Medical Anthropology Quarterly* 1994;**8**:178–97.  
23  
24  
25  
26 49 Sundararajan R, Kalkonde Y, Gokhale C, *et al*. Barriers to malaria control among marginalized tribal communities: a qualitative study. *PLoS ONE* 2013;**8**:e81966. doi:10.1371/journal.pone.0081966  
27  
28  
29  
30 50 Hampshire K, Hamill H, Mariwah S, *et al*. The application of Signalling Theory to health-related trust problems: The example of herbal clinics in Ghana and Tanzania. *Soc Sci Med* 2017;**188**:109–18. doi:10.1016/j.socscimed.2017.07.009  
31  
32  
33  
34 51 Ware NC, Wyatt MA, Geng EH, *et al*. Toward an understanding of disengagement from HIV treatment and care in sub-Saharan Africa: a qualitative study. *PLoS Med* 2013;**10**:e1001369–discussion1001369. doi:10.1371/journal.pmed.1001369  
35  
36  
37  
38 52 Mwamba C, Sharma A, Mukamba N, *et al*. ‘They care rudely!’: resourcing and relational health system factors that influence retention in care for people living with HIV in Zambia. *BMJ Glob Health* 2018;**3**:e001007. doi:10.1136/bmjgh-2018-001007  
39  
40  
41  
42 53 Layer EH, Brahmbhatt H, Beckham SW, *et al*. ‘I pray that they accept me without scolding:’ experiences with disengagement and re-engagement in HIV care and treatment services in Tanzania. *AIDS Patient Care STDS* 2014;**28**:483–8. doi:10.1089/apc.2014.0077  
43  
44  
45  
46  
47 54 Quinn K, Dickson-Gomez J, Zarwell M, *et al*. ‘A Gay Man and a Doctor are Just like, a Recipe for Destruction’: How Racism and Homonegativity in Healthcare Settings Influence PrEP Uptake Among Young Black MSM. *AIDS Behav* 2019;**23**:1951–63. doi:10.1007/s10461-018-2375-z  
48  
49  
50  
51  
52 55 Bradley S, McCourt C, Rayment J, *et al*. Disrespectful intrapartum care during facility-based delivery in sub-Saharan Africa: A qualitative systematic review and

- 1  
2  
3 thematic synthesis of women's perceptions and experiences. *Soc Sci Med*  
4 2016;**169**:157–70. doi:10.1016/j.socscimed.2016.09.039  
5
- 6 56 Asefa A, Bekele D, Morgan A, *et al.* Service providers' experiences of disrespectful  
7 and abusive behavior towards women during facility based childbirth in Addis  
8 Ababa, Ethiopia. *Reprod Health* 2018;**15**:4. doi:10.1186/s12978-017-0449-4  
9
- 10 57 Sipsma H, Thompson J, Maurer L, *et al.* Preferences for home delivery in Ethiopia:  
11 provider perspectives. *Glob Public Health* 2013;**8**:1014–26.  
12 doi:10.1080/17441692.2013.835434  
13
- 14 58 Abdullahi AA. Trends and challenges of traditional medicine in Africa. *Afr J Tradit*  
15 *Complement Altern Med* 2011;**8**:115–23. doi:10.4314/ajtcam.v8i5S.5  
16
- 17 59 Busia K. Medical provision in Africa -- past and present. *Phytother Res*  
18 2005;**19**:919–23. doi:10.1002/ptr.1775  
19
- 20 60 Rolfe A, Burton C. Reassurance after diagnostic testing with a low pretest  
21 probability of serious disease: systematic review and meta-analysis. *JAMA Intern*  
22 *Med* 2013;**173**:407–16. doi:10.1001/jamainternmed.2013.2762  
23
- 24 61 van Ravesteijn H, van Dijk I, Darmon D, *et al.* The reassuring value of diagnostic  
25 tests: a systematic review. *Patient Educ Couns* 2012;**86**:3–8.  
26 doi:10.1016/j.pec.2011.02.003  
27
- 28 62 Geleto A, Chojenta C, Mussa A, *et al.* Barriers to access and utilization of  
29 emergency obstetric care at health facilities in sub-Saharan Africa-a systematic  
30 review protocol. *Syst Rev* 2018;**7**:60. doi:10.1186/s13643-018-0720-y  
31
- 32 63 Onyemaechi NO, Lasebikan OA, Elachi IC, *et al.* Patronage of traditional  
33 bonesetters in Makurdi, north-central Nigeria. *Patient Prefer Adherence*  
34 2015;**9**:275–9. doi:10.2147/PPA.S76877  
35
- 36 64 Uribe-Leitz T, Jaramillo J, Maurer L, *et al.* Variability in mortality following  
37 caesarean delivery, appendectomy, and groin hernia repair in low-income and  
38 middle-income countries: a systematic review and analysis of published data.  
39 *Lancet Glob Health* 2016;**4**:e165–74. doi:10.1016/S2214-109X(15)00320-4  
40
- 41 65 Bishop D, Dyer RA, Maswime S, *et al.* Maternal and neonatal outcomes after  
42 caesarean delivery in the African Surgical Outcomes Study: a 7-day prospective  
43 observational cohort study. *Lancet Glob Health* 2019;**7**:e513–22.  
44 doi:10.1016/S2214-109X(19)30036-1  
45
- 46 66 Chang LW, Kagaayi J, Nakigozi G, *et al.* Effect of peer health workers on AIDS care  
47 in Rakai, Uganda: a cluster-randomized trial. *PLoS ONE* 2010;**5**:e10923.  
48 doi:10.1371/journal.pone.0010923  
49
- 50 67 Simoni JM, Nelson KM, Franks JC, *et al.* Are peer interventions for HIV efficacious?  
51 A systematic review. *AIDS Behav* 2011;**15**:1589–95. doi:10.1007/s10461-011-  
52 9963-5  
53  
54  
55  
56  
57  
58  
59

- 1  
2  
3 68 Semitala FC, Camlin CS, Wallenta J, *et al.* Understanding uptake of an intervention  
4 to accelerate antiretroviral therapy initiation in Uganda via qualitative inquiry. *J Int*  
5 *AIDS Soc* 2017;**20**:e25033. doi:10.1002/jia2.25033  
6
- 7 69 Kågesten A, Gibbs S, Blum RW, *et al.* Understanding Factors that Shape Gender  
8 Attitudes in Early Adolescence Globally: A Mixed-Methods Systematic Review.  
9 *PLoS ONE* 2016;**11**:e0157805. doi:10.1371/journal.pone.0157805  
10
- 11 70 Rock A, Barrington C, Abdoulayi S, *et al.* Social networks, social participation, and  
12 health among youth living in extreme poverty in rural Malawi. *Soc Sci Med*  
13 2016;**170**:55–62. doi:10.1016/j.socscimed.2016.10.005  
14
- 15 71 Coatsworth-Puspokoy R, Forchuk C, Ward-Griffin C. Peer support relationships: an  
16 unexplored interpersonal process in mental health. *J Psychiatr Ment Health Nurs*  
17 2006;**13**:490–7. doi:10.1111/j.1365-2850.2006.00970.x  
18
- 19 72 Alberta AJ, Ploski RR, Carlson SL. Addressing challenges to providing peer-based  
20 recovery support. *J Behav Health Serv Res* 2012;**39**:481–91. doi:10.1007/s11414-  
21 012-9286-y  
22
- 23 73 Hampshire KR, Owusu SA. Grandfathers, Google, and dreams: medical pluralism,  
24 globalization, and new healing encounters in Ghana. *Med Anthropol* 2013;**32**:247–  
25 65. doi:10.1080/01459740.2012.692740  
26
- 27 74 Long L, Kuchukhidze S, Pascoe S, *et al.* Differentiated models of service delivery  
28 for antiretroviral treatment of HIV in sub-Saharan Africa: a rapid review protocol.  
29 *Syst Rev* 2019;**8**:314–6. doi:10.1186/s13643-019-1210-6  
30
- 31 75 Blasini M, Peiris N, Wright T, *et al.* The Role of Patient-Practitioner Relationships in  
32 Placebo and Nocebo Phenomena. *Int Rev Neurobiol* 2018;**139**:211–31.  
33 doi:10.1016/bs.irm.2018.07.033  
34
- 35 76 Kleinman A, Sung L. Why Do Indigenous Practitioners Successfully Heal?  
36 1979;**138**:7–26.  
37
- 38 77 Moshabela M, Zuma T, Orne-Gliemann J, *et al.* 'It is better to die': experiences of  
39 traditional health practitioners within the HIV treatment as prevention trial  
40 communities in rural South Africa (ANRS 12249 TasP trial). *AIDS Care* 2016;**28**  
41 **Suppl 3**:24–32. doi:10.1080/09540121.2016.1181296  
42
- 43 78 Kayombo EJ, Uiso FC, Mbwambo ZH, *et al.* Experience of initiating collaboration of  
44 traditional healers in managing HIV and AIDS in Tanzania. *J Ethnobiol Ethnomed*  
45 2007;**3**:6. doi:10.1186/1746-4269-3-6  
46
- 47 79 Green EC. The participation of African traditional healers in AIDS/STD prevention  
48 programmes. *Trop Doct* 1997;**27 Suppl 1**:56–9. doi:10.1177/00494755970270S117  
49
- 50 80 King R. Collaboration with traditional healers in HIV/AIDS prevention and care in  
51 sub-Saharan Africa. <http://data.unaids.org/publications/irc-pubjic-tradhealen.pdf>.  
52 2000;:1–57.  
53  
54  
55  
56  
57  
58  
59

- 1  
2  
3 81 Audet CM, Salato J, Blevins M, *et al.* Educational intervention increased referrals to  
4 allopathic care by traditional healers in three high HIV-prevalence rural districts in  
5 Mozambique. *PLoS ONE* 2013;**8**:e70326–8. doi:10.1371/journal.pone.0070326  
6
- 7 82 Gall A, Anderson K, Adams J, *et al.* An exploration of healthcare providers'  
8 experiences and perspectives of Traditional and complementary medicine usage  
9 and disclosure by Indigenous cancer patients. *BMC Complement Altern Med*  
10 2019;**19**:259–9. doi:10.1186/s12906-019-2665-7  
11
- 12 83 Puoane TR, Hughes GD, Uwimana J, *et al.* Why HIV positive patients on  
13 antiretroviral treatment and/or cotrimoxazole prophylaxis use traditional medicine:  
14 perceptions of health workers, traditional healers and patients: a study in two  
15 provinces of South Africa. *Afr J Tradit Complement Altern Med* 2012;**9**:495–502.  
16 doi:10.4314/ajtcam.v9i4.6  
17
- 18 84 Kelak JA, Cheah WL, Safii R. Patient's Decision to Disclose the Use of Traditional  
19 and Complementary Medicine to Medical Doctor: A Descriptive Phenomenology  
20 Study. *Evid Based Complement Alternat Med* 2018;**2018**:4735234–11.  
21 doi:10.1155/2018/4735234  
22  
23  
24  
25

#### FIGURE CAPTION

26  
27 Figure 1. Conceptual model showing key factors within various levels (healthcare  
28 provider, healthcare system, peer) influencing individual health behavior within medically  
29 pluralistic contexts. Each factor differentially influences an individual's therapeutic  
30 itinerary. Negative factors may motivate a switch to the other modality, and positive  
31 factors contribute towards continued use of a particular healthcare modality. This model  
32 is not inclusive of all variables that influence health engagement, but illustrates  
33 categories that were described by our participants in driving their healthcare decision  
34 making, specifically regarding decisions to utilize traditional or biomedical care.  
35  
36  
37  
38  
39  
40  
41  
42  
43  
44  
45  
46  
47  
48  
49  
50  
51  
52  
53  
54  
55  
56  
57  
58  
59  
60



Figure 1. Conceptual model showing key factors within various levels (healthcare provider, healthcare system, peer) influencing individual health behavior within medically pluralistic contexts. Each factor differentially influences an individual's therapeutic itinerary. Negative factors may motivate a switch to the other modality, and positive factors contribute towards continued use of a particular healthcare modality. This model is not inclusive of all variables that influence health engagement, but illustrates categories that were described by our participants in driving their healthcare decision making, specifically regarding decisions to utilize traditional or biomedical care.

338x190mm (200 x 200 DPI)



## Standards for Reporting Qualitative Research (SRQR)\*

<http://www.equator-network.org/reporting-guidelines/srqr/>

Page/line no(s).

### Title and abstract

|                                                                                                                                                                                                                                                              |   |
|--------------------------------------------------------------------------------------------------------------------------------------------------------------------------------------------------------------------------------------------------------------|---|
| <p><b>Title</b> - Concise description of the nature and topic of the study Identifying the study as qualitative or indicating the approach (e.g., ethnography, grounded theory) or data collection methods (e.g., interview, focus group) is recommended</p> | 1 |
| <p><b>Abstract</b> - Summary of key elements of the study using the abstract format of the intended publication; typically includes background, purpose, methods, results, and conclusions</p>                                                               | 2 |

### Introduction

|                                                                                                                                                                     |     |
|---------------------------------------------------------------------------------------------------------------------------------------------------------------------|-----|
| <p><b>Problem formulation</b> - Description and significance of the problem/phenomenon studied; review of relevant theory and empirical work; problem statement</p> | 3-4 |
| <p><b>Purpose or research question</b> - Purpose of the study and specific objectives or questions</p>                                                              | 4   |

### Methods

|                                                                                                                                                                                                                                                                                                                                                                                                             |     |
|-------------------------------------------------------------------------------------------------------------------------------------------------------------------------------------------------------------------------------------------------------------------------------------------------------------------------------------------------------------------------------------------------------------|-----|
| <p><b>Qualitative approach and research paradigm</b> - Qualitative approach (e.g., ethnography, grounded theory, case study, phenomenology, narrative research) and guiding theory if appropriate; identifying the research paradigm (e.g., postpositivist, constructivist/ interpretivist) is also recommended; rationale**</p>                                                                            | 6   |
| <p><b>Researcher characteristics and reflexivity</b> - Researchers' characteristics that may influence the research, including personal attributes, qualifications/experience, relationship with participants, assumptions, and/or presuppositions; potential or actual interaction between researchers' characteristics and the research questions, approach, methods, results, and/or transferability</p> | 6   |
| <p><b>Context</b> - Setting/site and salient contextual factors; rationale**</p>                                                                                                                                                                                                                                                                                                                            | 4-5 |
| <p><b>Sampling strategy</b> - How and why research participants, documents, or events were selected; criteria for deciding when no further sampling was necessary (e.g., sampling saturation); rationale**</p>                                                                                                                                                                                              | 4-6 |
| <p><b>Ethical issues pertaining to human subjects</b> - Documentation of approval by an appropriate ethics review board and participant consent, or explanation for lack thereof; other confidentiality and data security issues</p>                                                                                                                                                                        | 7   |
| <p><b>Data collection methods</b> - Types of data collected; details of data collection procedures including (as appropriate) start and stop dates of data collection and analysis, iterative process, triangulation of sources/methods, and modification of procedures in response to evolving study findings; rationale**</p>                                                                             | 6   |

|    |                                                                                         |     |
|----|-----------------------------------------------------------------------------------------|-----|
| 1  |                                                                                         |     |
| 2  |                                                                                         |     |
| 3  | <b>Data collection instruments and technologies</b> - Description of instruments (e.g., |     |
| 4  | interview guides, questionnaires) and devices (e.g., audio recorders) used for data     |     |
| 5  | collection; if/how the instrument(s) changed over the course of the study               | 5-6 |
| 6  |                                                                                         |     |
| 7  | <b>Units of study</b> - Number and relevant characteristics of participants, documents, |     |
| 8  | or events included in the study; level of participation (could be reported in results)  | 7   |
| 9  |                                                                                         |     |
| 10 | <b>Data processing</b> - Methods for processing data prior to and during analysis,      |     |
| 11 | including transcription, data entry, data management and security, verification of      |     |
| 12 | data integrity, data coding, and anonymization/de-identification of excerpts            | 6-7 |
| 13 |                                                                                         |     |
| 14 | <b>Data analysis</b> - Process by which inferences, themes, etc., were identified and   |     |
| 15 | developed, including the researchers involved in data analysis; usually references a    |     |
| 16 | specific paradigm or approach; rationale**                                              | 6-7 |
| 17 |                                                                                         |     |
| 18 | <b>Techniques to enhance trustworthiness</b> - Techniques to enhance trustworthiness    |     |
| 19 | and credibility of data analysis (e.g., member checking, audit trail, triangulation);   |     |
| 20 | rationale**                                                                             | 6   |

### Results/findings

|    |                                                                                             |      |
|----|---------------------------------------------------------------------------------------------|------|
| 23 | <b>Synthesis and interpretation</b> - Main findings (e.g., interpretations, inferences, and |      |
| 24 | themes); might include development of a theory or model, or integration with                |      |
| 25 | prior research or theory                                                                    | 8-12 |
| 26 |                                                                                             |      |
| 27 | <b>Links to empirical data</b> - Evidence (e.g., quotes, field notes, text excerpts,        |      |
| 28 | photographs) to substantiate analytic findings                                              | 8-12 |
| 29 |                                                                                             |      |

### Discussion

|    |                                                                                           |       |
|----|-------------------------------------------------------------------------------------------|-------|
| 32 | <b>Integration with prior work, implications, transferability, and contribution(s) to</b> |       |
| 33 | <b>the field</b> - Short summary of main findings; explanation of how findings and        |       |
| 34 | conclusions connect to, support, elaborate on, or challenge conclusions of earlier        |       |
| 35 | scholarship; discussion of scope of application/generalizability; identification of       |       |
| 36 | unique contribution(s) to scholarship in a discipline or field                            | 12-15 |
| 37 |                                                                                           |       |
| 38 | <b>Limitations</b> - Trustworthiness and limitations of findings                          | 15    |
| 39 |                                                                                           |       |

### Other

|    |                                                                                            |    |
|----|--------------------------------------------------------------------------------------------|----|
| 42 | <b>Conflicts of interest</b> - Potential sources of influence or perceived influence on    |    |
| 43 | study conduct and conclusions; how these were managed                                      | 16 |
| 44 |                                                                                            |    |
| 45 | <b>Funding</b> - Sources of funding and other support; role of funders in data collection, |    |
| 46 | interpretation, and reporting                                                              | 16 |
| 47 |                                                                                            |    |

\*The authors created the SRQR by searching the literature to identify guidelines, reporting standards, and critical appraisal criteria for qualitative research; reviewing the reference lists of retrieved sources; and contacting experts to gain feedback. The SRQR aims to improve the transparency of all aspects of qualitative research by providing clear standards for reporting qualitative research.

1  
2  
3  
4  
5  
6  
7  
8  
9  
10  
11  
12  
13  
14  
15  
16  
17  
18  
19  
20  
21  
22  
23  
24  
25  
26  
27  
28  
29  
30  
31  
32  
33  
34  
35  
36  
37  
38  
39  
40  
41  
42  
43  
44  
45  
46  
47  
48  
49  
50  
51  
52  
53  
54  
55  
56  
57  
58  
59  
60

\*\*The rationale should briefly discuss the justification for choosing that theory, approach, method, or technique rather than other options available, the assumptions and limitations implicit in those choices, and how those choices influence study conclusions and transferability. As appropriate, the rationale for several items might be discussed together.

**Reference:**

O'Brien BC, Harris IB, Beckman TJ, Reed DA, Cook DA. **Standards for reporting qualitative research: a synthesis of recommendations.** *Academic Medicine*, Vol. 89, No. 9 / Sept 2014  
DOI: 10.1097/ACM.0000000000000388

For peer review only
